# Supplementary material for: A Missense Variant in CASKIN1’s Proline-Rich Region Segregates with Psychosis in a Three-Generation Family
Source: MDPI journal article supplement (doi:10.3390/genes14010177), 2023-01-09
Supplement: s1 [file s1]

Supplementary Materials

# A Missense Variant in CASKIN1's Proline-Rich Region Segregates with Psychosis in a Three-Generation Family

**Table S1.** Family diagnosis information.

| Individual | Age at Diagnosis | Gender | Diagnosis (MINI)                      | DSM IV Diagnosis (Consensus)            | Other Diagnoses      |
|------------|------------------|--------|---------------------------------------|-----------------------------------------|----------------------|
| I-2        | 85               | M      | No Psychotic Disorder                 | No Psychotic Disorder                   |                      |
| I-3        | 81               | F      | No Psychotic Disorder                 | No Psychotic Disorder                   | Anxiety Disorder     |
| I-4        | 67               | F      | Psychotic Disorder                    | Schizophrenia                           | Postpartum onset     |
| II-3       | 57               | F      | No Psychotic Disorder                 | No Psychotic Disorder                   | Retinitis Pigmentosa |
| II-5       | 55               | M      | No Psychotic Disorder                 | No Psychotic Disorder                   | Retinitis Pigmentosa |
| II-7       | 37               | F      | Psychotic Disorder                    | Schizophrenia                           |                      |
| III-10     | 30               | M      | No Psychotic Disorder                 | No Psychotic Disorder                   |                      |
| II-11      | 33               | M      | Psychotic Disorder                    | Schizophrenia                           | Retinitis Pigmentosa |
| II-13      | 37               | F      | Psychotic Disorder                    | Schizophrenia                           | Postpartum Onset     |
| III-3      | 39               | M      | No Psychotic Disorder                 | No Psychotic Disorder                   |                      |
| III-8      | 26               | M      | No Psychotic Disorder                 | No Psychotic Disorder                   |                      |
| III-9      | 27               | M      | Mood Disorder with Psychotic Features | Bipolar Disorder I                      |                      |
| III-11     | 28               | M      | No Psychotic Disorder                 | No Psychotic Disorder                   |                      |
| III-12     | 15               | F      | Psychotic Disorder                    | Schizoaffective Disorder (bipolar type) |                      |

**Table S2.** Bioinformatic predictions of functionality of variants discovered.

| Gene          | Variant              | Variant locus and allele change | p LI | Missense Z | Presence in databases      | VEST | fathmm  |
|---------------|----------------------|---------------------------------|------|------------|----------------------------|------|---------|
| <i>RHEBL1</i> | Valine 114 Δ Leucine | Chr12: 49460054 C-->G           | 0    | 0.84       | N/A in dbSNP, ExAC, gnomAD | 0.6  | 0.98511 |

|                |                                     |                         |   |      |                                    |       |         |
|----------------|-------------------------------------|-------------------------|---|------|------------------------------------|-------|---------|
| <i>CASKIN1</i> | Aspartate<br>1204 Δ Aspar-<br>agine | Chr16: 2229759<br>G-->A | 1 | 1.79 | N/A in dbSNP,<br>ExAC, gno-<br>mAD | 0.025 | 0.94836 |
|----------------|-------------------------------------|-------------------------|---|------|------------------------------------|-------|---------|

Score descriptions:

- **pLI:** Probability of loss of function intolerance.
- **Missense Z:** Z scores indicate intolerance to missense variation. Z scores larger than 2 indicate intolerance at the 5<sup>th</sup> percentile.
- **VEST:** Predicts the functional significance of a missense mutation based on the probability that it's pathogenic. Scores near 1 indicate a functional prediction.
- **fathmm:** Predicts the consequences of coding variation – The range is 0-1 values above 0.5 are predicted to be deleterious

All genomic positions are in hg19

**Table S3.** SCZ and BPD PRS for penetrant and non-penetrant individuals.

| ID     | Diagnosis       | PRS-SZ-threshed p =<br>0.00115 | PRS-BPD threshold<br>p<5e-4 |
|--------|-----------------|--------------------------------|-----------------------------|
| II-3   | Non-penetrant   | 0.00045                        | -0.00388                    |
| III-12 | Schizoaffective | 0.00063                        | -0.00447                    |
| III-9  | Bipolar - I     | 0.00053                        | -0.00412                    |
| I-3    | Non-penetrant   | 0.00040                        | -0.00393                    |
| I-4    | Schizophrenia   | 0.00067                        | -0.00479                    |
| II-7   | Schizophrenia   | 0.00051                        | -0.00432                    |
| II-13  | Schizophrenia   | 0.00069                        | -0.00411                    |
| II-11  | Schizophrenia   | 0.00053                        | -0.00411                    |

**Table S4.** On target and off target primers.

| Locus                         | Forward primer                | Reverse primer                 |
|-------------------------------|-------------------------------|--------------------------------|
| Chr16:2179957-<br>2179555     | 5'-CGTCAAGTTCATCCTGACCG-3'    | 5'-GAGTAAGGAGGTGGAGCAGG-3'     |
| ChrX: 154468525-<br>154468995 | 5'-GAGAGCAAGAACCACCCCAA-3'    | 5'-CTCTCTCTGCACCCCTACCT-3'     |
| Chr16:71168265-<br>71168864   | 5'-GCAGAGATCACACCATTGCACT-3'  | 5'-GAACCACAAATTTTGATTGGACAT-3' |
| Chr1: 146541273-<br>146541827 | 5'-TAGTCTCCAAATTTTCAGGGCGG-3' | 5'-AGTGAGCAGAGATCACACCA-3'     |

**Table S5.** sgRNA oligo sequences with Bbs1 sticky ends bolded and ssODN sequence.

| Forward Oligo                                                                                                                                                                                | Reverse Oligo                                | Forward Oligo                                |
|----------------------------------------------------------------------------------------------------------------------------------------------------------------------------------------------|----------------------------------------------|----------------------------------------------|
| 5'- <b>CACCGG</b> -<br>TAGGTGCGCCAGGTCGGT-3'                                                                                                                                                 | 5'- <b>AAACACCGACCTGGCG</b> -<br>CACCTACC-3' | 5'- <b>CACCGG</b> -<br>TAGGTGCGCCAGGTCGGT-3' |
| <b>ssODN:</b> 5'-CTTGGGAGAGACAGGCGGCTTGGCCGGCTTCCGGGCTTCGCCCTCGGGCGGGGG-<br>CAATGaGGGTAGGTcCGaCAGGTtGGTGGGCGGGGGTTCGGCAGGCGGGGCGGTGGAGGCAG<br>CTCCGGAGGCCACGCTGCTCCGAGGCCGGTTCGGCGGCACGG- 3' |                                              |                                              |

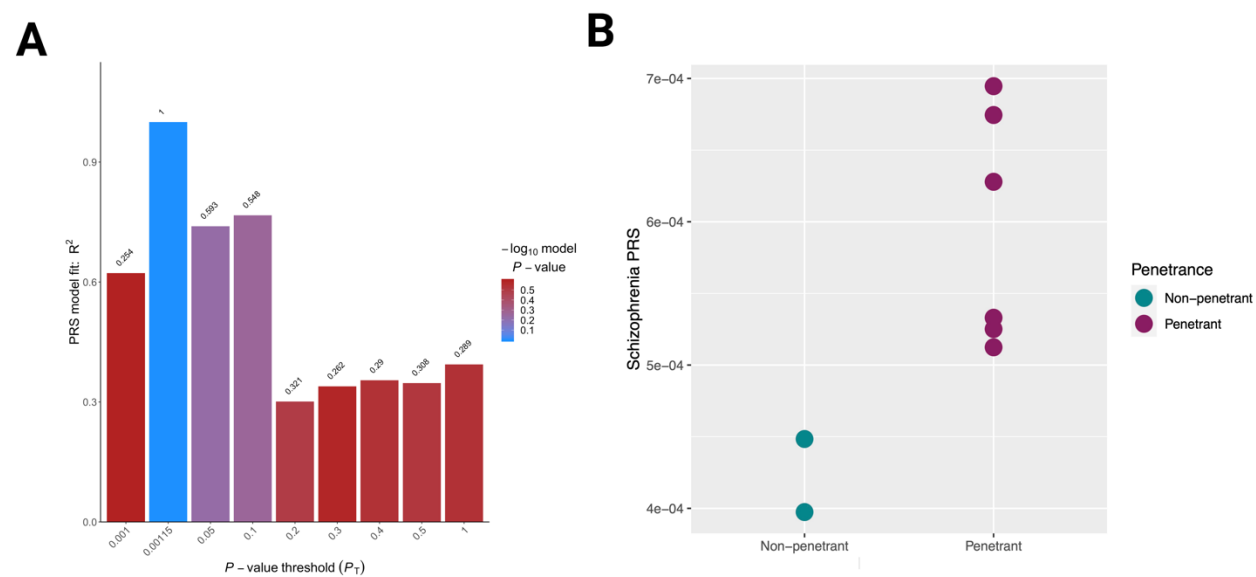

**Figure S1. PRSs correlate with the penetrance of CAKSIN1 D1204N.** (A) Correlation of score with penetrance at different p-value thresholds. Correlation reaches 1 at a threshold of 0.00115. (B) PRS scores of for each individual at the best threshold.

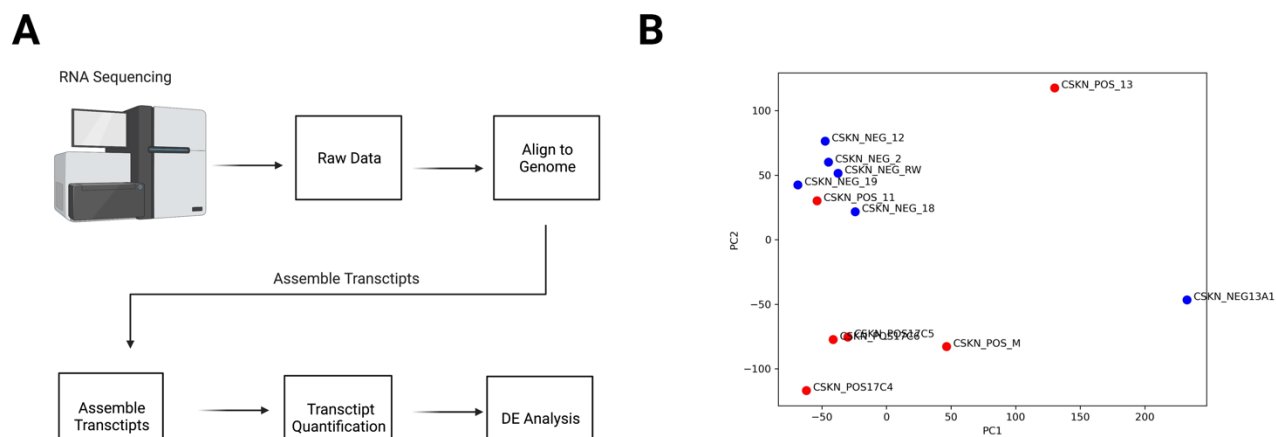

**Figure S2. RNA-seq flow and PCA. (A)** Flow of RNA-seq analysis. **(B)** Principal Component Analysis (PCA), PC1 and PC2. Each dot is a clone. All red clones are edited. All blue clones are unedited. PC1 separates out 2 clones, one edited and one unedited. These clones were taken out of RNA-seq analysis.

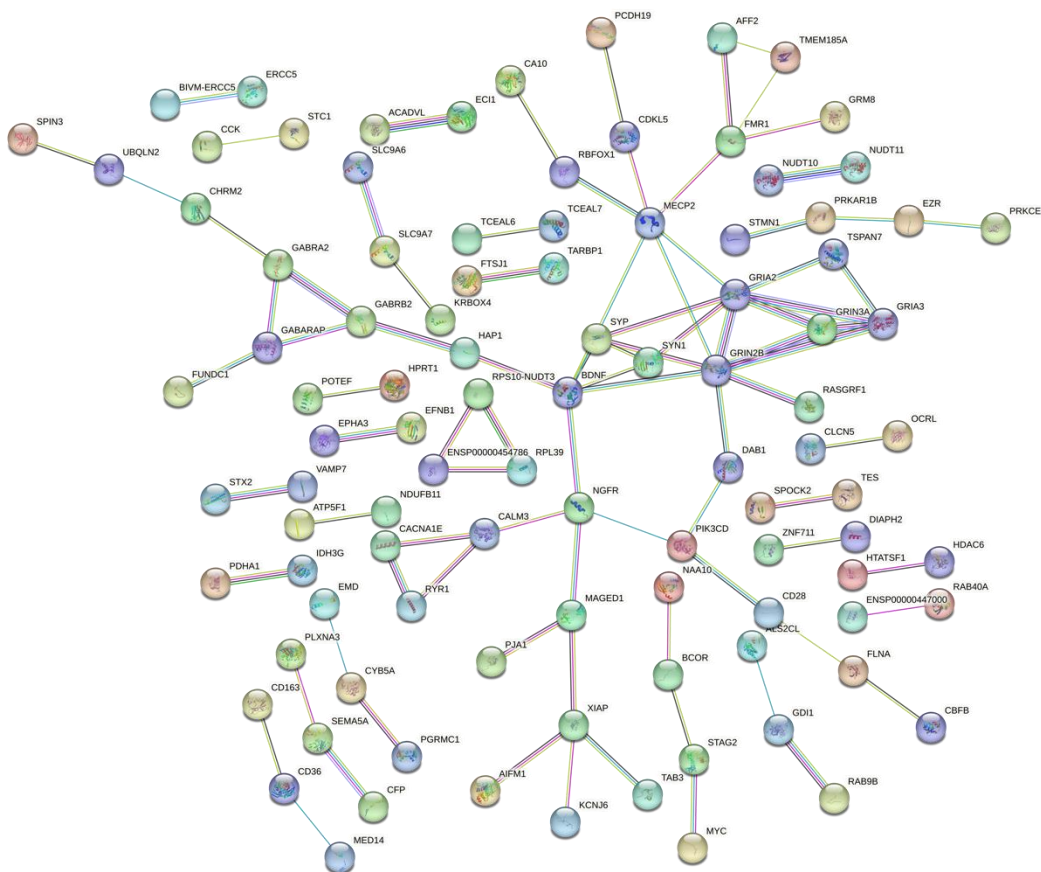

**Figure S3. STRING analysis of protein-protein interactions of DEG.** Network nodes represent proteins of significantly DEG genes ( $p_{adj} < 0.05$ ) that have an interaction with one or more proteins within the same set of genes as represented by the Edges. The minimum required interaction score was 0.7 (high confidence). We found a strong enrichment in PPI with 89 observed edges as compared to the expected 47 for a random set of genes ( $p$ -value:  $2.5e-08$ ).

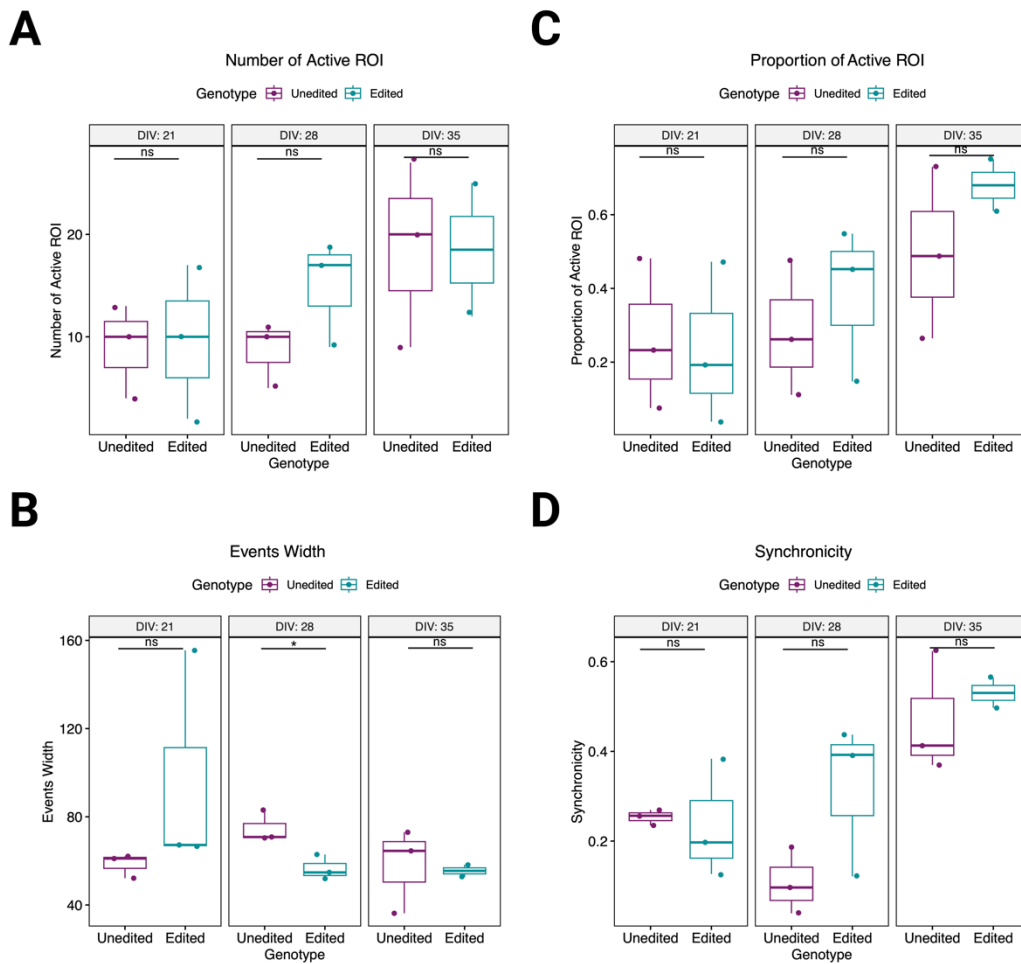

**Figure S4. Calcium imaging data.** (A) Number of active ROIs in edited (teal) and unedited (purple) cells across 3 time points (all p-values are nominal): DIV21( $p = 0.903$ ), DIV28 ( $p = 0.166$ ), and DIV35 ( $p = 0.986$ ). (B) Events width in edited (teal) and unedited (purple) cells across 3 time points: DIV21( $p = 0.327$ ), DIV28 ( $p = 0.282$ ), and DIV35 ( $p = 0.850$ ). (C) Proportion of active ROIs in edited (teal) and unedited (purple) cells across 3 time points: DIV21 ( $p = 0.876$ ), DIV28 ( $p = 0.569$ ), and DIV35 ( $p = 0.312$ ). (D) Synchronicity in edited (teal) and unedited (purple) cells across 3 time points: DIV21 ( $p = 0.839$ ), DIV28  $p = 0.156$ , and DIV35  $p = 0.528$ ).
