# Supplementary material for: A Missense Variant in CASKIN1’s Proline-Rich Region Segregates with Psychosis in a Three-Generation Family
Source: Genes (Basel). 2023 Jan 9;14(1):177. doi: 10.3390/genes14010177 (PMC9859343; doi:10.3390/genes14010177)
Supplement: Supplementary file 1 [file genes-14-00177-s001.zip › genes-2119082-supplementary Tables S6, S7, S8.xlsx]

## Sheet: TableS6 Neuronal marker FPKM
Marker	Genename	Identity	CSKN_NEG13A1_FPKM	CSKN_NEG_19_FPKM	CSKN_POS17C4_FPKM	CSKN_POS_11_FPKM	CSKN_NEG_12_FPKM	CSKN_NEG_2_FPKM	CSKN_POS17C5_FPKM	CSKN_POS_13_FPKM	CSKN_NEG_18_FPKM	CSKN_NEG_RW_FPKM	CSKN_POS17C6_FPKM	CSKN_POS_M_FPKM
NeuN	RBFOX3	Neuronal	15.56	29.0626	30.8639	29.7003	26.0589	25.702	32.239	15.4664	24.5657	29.1456	29.6478	24.3785
MAP2	MAP2	Neuronal	335.314	298.881	224.645	249.093	192.842	247.615	223.737	204.17	216.43	221.044	254.596	292.745
160kDaaneurofilamentmedium	NEFM	Neuronal	967.509	2623.57	1067.13	2291.96	2566.09	2124.07	1524.96	1499.11	1769.46	2728.64	1548.16	1321.04
200kDaaneurofilamentheavy	NEFH	Neuronal	7.33849	12.2725	9.92423	12.1703	12.9341	11.8124	12.36	8.16101	12.2181	15.584	12.2897	12.9622
PSD95	DLG4	Neuronal	69.1845	101.496	139.248	97.4084	100.662	96.9962	138.398	69.4344	97.6085	97.9658	119.01	103.975
TUJ1	TUBB3	Neuronal	894.211	1874.77	1189.82	1606.88	1398.6	1507.81	1437.19	1277.35	1448.17	1635.46	1345.46	1175.25
vGluT1	SLC17A7	Glutamatergic	13.2483	35.6328	14.8797	26.3965	21.3843	19.8787	22.6843	18.4444	26.2853	21.2957	23.4288	24.1859
vGluT2	SLC17A6	Glutamatergic	155.936	89.645	98.337	99.3599	75.7376	77.1603	116.765	89.8163	104.533	84.7183	89.6433	113.259
NMDAR1	GRIN1	Glutamatergic	1.50895	5.25293	7.3257	6.86654	8.30526	7.8033	4.69176	4.50555	6.21005	11.0594	4.94075	3.06391
Glutaminase	GLS	Glutamatergic	56.7117	45.7329	38.1673	41.4056	33.6274	36.1661	38.9803	34.6712	45.8652	36.7418	42.2087	41.2058
Glutaminesynthetase	GLUL	Glutamatergic	26.3089	29.9	37.9755	29.6126	24.6506	25.1598	28.9917	27.2753	24.902	24.55	27.0181	26.8619

## Sheet: TableS7 GSEA results 
Gene Sets	Size	ES	NES	Nominal p-value
REACTOME_TRAFFICKING_OF_GLUR2_CONTAINING_AMPA_RECEPTORS	17	0.71426845	1.5830892	0
REACTOME_MECP2_REGULATES_NEURONAL_RECEPTORS_AND_CHANNELS	18	0.7299233	1.5664452	0
REACTOME_RAS_ACTIVATION_UPON_CA2_INFLUX_THROUGH_NMDA_RECEPTOR	20	0.63316274	1.4953085	0
WP_NOCGMPPKG_MEDIATED_NEUROPROTECTION	48	0.5719573	1.4807593	0
REACTOME_LONG_TERM_POTENTIATION	23	0.65437716	1.4632868	0
KEGG_NEUROACTIVE_LIGAND_RECEPTOR_INTERACTION	272	0.4872605	1.3442099	0.004
REACTOME_TRAFFICKING_OF_AMPA_RECEPTORS	31	0.66357493	1.4720176	0.00606061
REACTOME_CREB1_PHOSPHORYLATION_THROUGH_NMDA_RECEPTOR_MEDIATED_ACTIVATION_OF_RAS_SIGNALING	28	0.59776914	1.4285833	0.00819672
REACTOME_NEGATIVE_REGULATION_OF_NMDA_RECEPTOR_MEDIATED_NEURONAL_TRANSMISSION	21	0.6017401	1.376486	0.01226994
REACTOME_UNBLOCKING_OF_NMDA_RECEPTORS_GLUTAMATE_BINDING_AND_ACTIVATION	21	0.71976626	1.4719789	0.02258727
WP_NEUROINFLAMMATION_AND_GLUTAMATERGIC_SIGNALING	144	0.51938045	1.3904846	0.02729045
WP_PHOSPHODIESTERASES_IN_NEURONAL_FUNCTION	53	0.5427587	1.3663814	0.02755906
WP_COMPLEMENT_SYSTEM_IN_NEURONAL_DEVELOPMENT_AND_PLASTICITY	108	0.48969758	1.2933022	0.04238921
KEGG_LONG_TERM_DEPRESSION	70	0.5279366	1.3690319	0.06224066
WP_GPCRS_CLASS_C_METABOTROPIC_GLUTAMATE_PHEROMONE	16	0.6793957	1.3823162	0.06876228
REACTOME_ACTIVATION_OF_NMDA_RECEPTORS_AND_POSTSYNAPTIC_EVENTS	93	0.473731	1.3118525	0.08032128
REACTOME_ASSEMBLY_AND_CELL_SURFACE_PRESENTATION_OF_NMDA_RECEPTORS	43	0.45799854	1.239439	0.08527132
KEGG_LONG_TERM_POTENTIATION	70	0.49757493	1.3124526	0.09815951
REACTOME_NEUREXINS_AND_NEUROLIGINS	56	0.54245365	1.3149204	0.10358566
REACTOME_NEURONAL_SYSTEM	409	0.42496818	1.2143285	0.1183432
REACTOME_DOPAMINE_NEUROTRANSMITTER_RELEASE_CYCLE	23	0.5187806	1.268889	0.12055336
WP_BRAINDERIVED_NEUROTROPHIC_FACTOR_BDNF_SIGNALING_PATHWAY	144	0.3490699	1.1367999	0.13894737
REACTOME_NEUROTRANSMITTER_RELEASE_CYCLE	51	0.46127757	1.1988502	0.15429688
REACTOME_NEUROTRANSMITTER_RECEPTORS_AND_POSTSYNAPTIC_SIGNAL_TRANSMISSION	204	0.42472446	1.1805845	0.16465864
REACTOME_NA_CL_DEPENDENT_NEUROTRANSMITTER_TRANSPORTERS	19	0.5903097	1.2087103	0.23632812
REACTOME_SEROTONIN_NEUROTRANSMITTER_RELEASE_CYCLE	18	0.46945414	1.1589885	0.24329896
KEGG_ALANINE_ASPARTATE_AND_GLUTAMATE_METABOLISM	30	0.38617584	1.0631042	0.3184584
REACTOME_CLASS_C_3_METABOTROPIC_GLUTAMATE_PHEROMONE_RECEPTORS	39	0.42391348	1.053905	0.342
WP_GLUTATHIONE_METABOLISM	22	0.46565387	1.0679476	0.37747034
REACTOME_NOREPINEPHRINE_NEUROTRANSMITTER_RELEASE_CYCLE	18	0.41599607	1.0314074	0.39078155
WP_NEURAL_CREST_DIFFERENTIATION	102	0.3478088	1.0153211	0.4334601
KEGG_GLUTATHIONE_METABOLISM	49	0.4020588	0.910259	0.5752577
REACTOME_FOXO_MEDIATED_TRANSCRIPTION_OF_OXIDATIVE_STRESS_METABOLIC_AND_NEURONAL_GENES	29	0.35330546	0.94410276	0.5922131
REACTOME_GLUTATHIONE_CONJUGATION	35	0.36131617	0.8177103	0.7252525
REACTOME_NCAM_SIGNALING_FOR_NEURITE_OUT_GROWTH	63	0.3129297	0.81505406	0.8364389
WP_DOPAMINERGIC_NEUROGENESIS	30	0.3726533	0.7807196	0.8560311

## Sheet: TableS8 DEG 
Gene	baseMean	log2FoldChange	lfcSE	stat	pvalue	padj	gene_id
AC023055.1	133.646	-3.7627	0.355938	-10.5712	4.05197e-26	7.34379e-22	ENSG00000257390
AC018865.3	203.977	4.96868	0.474233	10.4773	1.09837e-25	9.95342e-22	ENSG00000286058
FAR2P1	87.444	7.44115	0.72884	10.2096	1.79654e-24	1.08535e-20	ENSG00000180178
ISY1-RAB43	133.619	10.4405	1.09524	9.53262	1.53357e-21	6.94862e-18	ENSG00000261796
PCAT7	267.318	3.46632	0.42353	8.18435	2.73768e-16	9.92355e-13	ENSG00000231806
GRIN2B	425.528	1.99625	0.250254	7.97688	1.50073e-15	4.53321e-12	ENSG00000273079
AC026273.1	56.5448	5.66359	0.740218	7.65124	1.99056e-14	5.15385e-11	ENSG00000286156
AC092143.1	227.816	-27.0563	3.6098	-7.49524	6.61795e-14	1.4993e-10	ENSG00000198211
AC008443.3	41.2754	5.6926	0.809194	7.0349	1.994e-12	4.01546e-09	ENSG00000248103
LINC00839	24.1948	-24.5533	3.57889	-6.8606	6.85717e-12	1.24279e-08	ENSG00000185904
DERPC	477.35	-1.58136	0.23717	-6.66763	2.59965e-11	4.28328e-08	ENSG00000286140
AC245033.1	147.503	23.8946	3.65207	6.54276	6.03937e-11	9.12146e-08	ENSG00000260836
AL590226.1	60.3133	-23.8187	3.65211	-6.5219	6.94245e-11	9.67885e-08	ENSG00000228401
FAM156A	904.705	1.09762	0.170333	6.44397	1.1639e-10	1.50675e-07	ENSG00000268350
KLF2P1	52.0081	6.48493	1.01379	6.39673	1.58735e-10	1.91794e-07	ENSG00000231240
CBLN4	24.8378	-8.19632	1.2841	-6.38293	1.73728e-10	1.9679e-07	ENSG00000054803
KCNA6	39.2063	4.48216	0.737062	6.08112	1.19345e-09	1.27235e-06	ENSG00000151079
AC244197.3	318.346	1.22589	0.203974	6.01003	1.8549e-09	1.86768e-06	ENSG00000241489
RPS2P28	11.9448	21.3519	3.58098	5.9626	2.48263e-09	2.36817e-06	ENSG00000179157
CHRM2	754.01	-1.90689	0.320505	-5.94964	2.68738e-09	2.43531e-06	ENSG00000181072
AC019257.9	25.9326	21.3648	3.6522	5.84983	4.92067e-09	4.05915e-06	ENSG00000285957
AC079584.2	26.327	21.3639	3.6522	5.84961	4.92724e-09	4.05915e-06	ENSG00000257226
ARHGAP4	131.289	1.93992	0.333212	5.82187	5.81945e-09	4.58572e-06	ENSG00000089820
MID1	254.652	1.59379	0.274443	5.80737	6.34635e-09	4.60085e-06	ENSG00000101871
Z83843.1	228.878	1.47543	0.253799	5.81338	6.12223e-09	4.60085e-06	ENSG00000271533
MAGEE2	37.2131	5.07351	0.889831	5.70166	1.18648e-08	8.27066e-06	ENSG00000186675
DRAXIN	2914.22	-1.01446	0.178534	-5.68215	1.33012e-08	8.92857e-06	ENSG00000162490
AACSP1	230.352	10.1888	1.83418	5.55497	2.77657e-08	1.73526e-05	ENSG00000250420
PHACTR3	1013.43	-1.60196	0.288281	-5.55693	2.74553e-08	1.73526e-05	ENSG00000087495
PCDH19	1707.85	1.535	0.278269	5.51623	3.46341e-08	2.09236e-05	ENSG00000165194
FAR2P4	21.9698	6.44175	1.18492	5.43646	5.43498e-08	3.17754e-05	ENSG00000231431
CDYL2	942.357	-0.761872	0.141944	-5.36743	7.98648e-08	4.26773e-05	ENSG00000166446
LINC02506	510.064	8.9254	1.66019	5.37612	7.61073e-08	4.26773e-05	ENSG00000251129
MYOM2	122.872	-1.48688	0.277041	-5.36699	8.00612e-08	4.26773e-05	ENSG00000036448
HSPE1-MOB4	37.9792	19.2795	3.60989	5.34074	9.25702e-08	4.79355e-05	ENSG00000270757
RPS10-NUDT3	815.826	-1.13754	0.213927	-5.31743	1.05242e-07	5.29835e-05	ENSG00000270800
KRT8P4	31.2144	19.1477	3.60991	5.30419	1.13171e-07	5.54357e-05	ENSG00000248231
AL133500.1	40.6571	18.9624	3.60996	5.2528	1.49803e-07	7.14483e-05	ENSG00000285547
GRIA2	2903.78	0.980353	0.187302	5.23407	1.65821e-07	7.70599e-05	ENSG00000120251
CD28	36.3573	-4.85314	0.939851	-5.16373	2.42071e-07	0.000109682	ENSG00000178562
AL035461.3	22.2657	18.5917	3.61008	5.14994	2.60567e-07	0.000112441	ENSG00000286235
FTX	2058.55	0.815431	0.158335	5.15005	2.60421e-07	0.000112441	ENSG00000230590
BX322639.1	736.606	-1.17235	0.228526	-5.13007	2.89638e-07	0.000116653	ENSG00000215146
NCAM2	3147.47	-1.04662	0.203949	-5.13179	2.87004e-07	0.000116653	ENSG00000154654
POTEE	26.225	4.11731	0.80172	5.1356	2.81251e-07	0.000116653	ENSG00000188219
PRKAR1B	2804.71	-0.934137	0.182326	-5.12343	3.00026e-07	0.00011821	ENSG00000188191
FLNA	4863.41	0.694313	0.135799	5.1128	3.17421e-07	0.000122403	ENSG00000196924
ZNF208	571.454	-12.7542	2.52677	-5.04763	4.47333e-07	0.000168905	ENSG00000160321
BCOR	1877.95	-0.769184	0.154531	-4.97754	6.43979e-07	0.000238193	ENSG00000183337
IDH3G	1413.94	0.741804	0.150361	4.93347	8.07804e-07	0.000292813	ENSG00000067829
ZCCHC18	1133.3	1.07818	0.220036	4.90002	9.58292e-07	0.000340551	ENSG00000166707
CDH20	873.069	1.0453	0.215808	4.84366	1.27468e-06	0.000444274	ENSG00000101542
AC010547.4	133.731	2.08945	0.433793	4.81669	1.45959e-06	0.000499124	ENSG00000261611
MSL3	1286.42	0.812154	0.169726	4.78509	1.70909e-06	0.00057362	ENSG00000005302
STMN1	36448.6	-0.507613	0.106369	-4.77221	1.82217e-06	0.000600455	ENSG00000117632
AC012213.5	31.1491	5.40707	1.136	4.75977	1.93815e-06	0.000627267	ENSG00000285982
AC008443.7	24.2858	4.33084	0.914088	4.73788	2.15965e-06	0.000661167	ENSG00000274525
AC138035.1	74.591	1.56907	0.331391	4.73481	2.19255e-06	0.000661167	ENSG00000238035
SLC30A8	414.792	7.68214	1.61904	4.74488	2.08633e-06	0.000661167	ENSG00000164756
VPS13A	2298.53	0.489445	0.103437	4.73181	2.22529e-06	0.000661167	ENSG00000197969
ZNF449	397.927	1.05088	0.221674	4.74067	2.13014e-06	0.000661167	ENSG00000173275
CLCN5	2598.21	1.22647	0.261069	4.69789	2.62857e-06	0.000760399	ENSG00000171365
TAB3	2732.86	0.955277	0.203419	4.69612	2.65154e-06	0.000760399	ENSG00000157625
ZNF41	444.115	0.874613	0.186344	4.69354	2.68514e-06	0.000760399	ENSG00000147124
SPOCK2	12539.2	-0.806062	0.172887	-4.66237	3.12589e-06	0.000871595	ENSG00000107742
MDK	1379.21	-0.952912	0.204887	-4.65092	3.30462e-06	0.000907468	ENSG00000110492
PLXNA3	6624.76	0.717726	0.155257	4.62284	3.7853e-06	0.00102395	ENSG00000130827
FHL1	6889.45	0.655243	0.14235	4.60304	4.1637e-06	0.00110975	ENSG00000022267
IGSF1	236.411	1.41324	0.308354	4.58318	4.57957e-06	0.0012029	ENSG00000147255
GOLGA8A	2598.18	0.63591	0.139162	4.56957	4.88722e-06	0.00126537	ENSG00000175265
HCCS	684.761	1.10958	0.244132	4.54499	5.49368e-06	0.00140236	ENSG00000004961
ZNF439	184.861	-6.52916	1.43861	-4.5385	5.66552e-06	0.00142614	ENSG00000171291
CCDC144NL-AS1	381.924	6.61061	1.46215	4.52116	6.15018e-06	0.00151561	ENSG00000233098
PLEKHG4B	130.929	-1.94005	0.429229	-4.51985	6.18821e-06	0.00151561	ENSG00000153404
AL732372.2	115.357	1.3299	0.29452	4.51549	6.3172e-06	0.00152657	ENSG00000237094
GK	505.716	1.12347	0.24954	4.50218	6.72598e-06	0.00158314	ENSG00000198814
PDLIM2	99.4545	-1.91845	0.426093	-4.50242	6.71853e-06	0.00158314	ENSG00000120913
FSTL5	974.145	1.02796	0.229049	4.48794	7.19136e-06	0.0016693	ENSG00000168843
HYDIN	327.51	1.00176	0.223336	4.48544	7.27626e-06	0.0016693	ENSG00000157423
CD163	54.9173	1.76692	0.394307	4.48107	7.42712e-06	0.00168261	ENSG00000177575
MIR100HG	450.292	1.17834	0.263337	4.47464	7.654e-06	0.00169172	ENSG00000255248
ZBED6CL	362.767	1.58616	0.354317	4.47666	7.58209e-06	0.00169172	ENSG00000188707
CA10	1367.99	-1.11346	0.249076	-4.47037	7.8085e-06	0.00170138	ENSG00000154975
WDR13	3003.86	0.668151	0.149532	4.46827	7.88545e-06	0.00170138	ENSG00000101940
CLDN6	210.283	-2.07165	0.465141	-4.45382	8.43552e-06	0.00179865	ENSG00000184697
CALM3	45088.4	-0.416181	0.0936419	-4.44439	8.81421e-06	0.00183619	ENSG00000160014
SSR4	2476.06	0.620272	0.13956	4.44448	8.81031e-06	0.00183619	ENSG00000180879
RPL39P3	517.22	0.982858	0.222485	4.41763	9.97893e-06	0.00205521	ENSG00000235174
GRIA3	1767.17	1.11397	0.25309	4.40147	1.07519e-05	0.00218953	ENSG00000125675
AC107398.3	114.379	-7.56192	1.72291	-4.38903	1.13855e-05	0.0022676	ENSG00000260918
NHSL2	383.545	1.80246	0.410497	4.39094	1.12864e-05	0.0022676	ENSG00000204131
MEG3	6033.39	15.3604	3.5326	4.3482	1.37262e-05	0.00270407	ENSG00000214548
PDHA1	3236.61	0.753828	0.173966	4.33319	1.46962e-05	0.00283664	ENSG00000131828
TSPYL2	1267.25	0.941226	0.217225	4.33295	1.47122e-05	0.00283664	ENSG00000184205
CBLN2	371.953	-10.706	2.47595	-4.32401	1.53221e-05	0.00292312	ENSG00000141668
MOSPD2	618.015	1.00909	0.233641	4.31898	1.56752e-05	0.00295935	ENSG00000130150
HS6ST2	831.676	0.863246	0.20043	4.30696	1.65511e-05	0.00309249	ENSG00000171004
IDSP1	19.9627	4.45326	1.03967	4.28335	1.84097e-05	0.00340467	ENSG00000176289
ZNF98	23.4407	-5.90752	1.38038	-4.27964	1.87199e-05	0.00342706	ENSG00000197360
PNCK	903.794	1.02513	0.239907	4.27302	1.9284e-05	0.00346043	ENSG00000130822
TLX3	864.141	-1.39791	0.327136	-4.27317	1.92712e-05	0.00346043	ENSG00000164438
CRLF1	213.741	-1.0339	0.242506	-4.26341	2.01328e-05	0.00351522	ENSG00000006016
HPRT1	883.092	0.808363	0.189467	4.26652	1.98547e-05	0.00351522	ENSG00000165704
SINHCAF	800.352	-0.736618	0.172794	-4.26299	2.01712e-05	0.00351522	ENSG00000139146
STC1	307.765	0.965508	0.226647	4.25996	2.04464e-05	0.00352925	ENSG00000159167
C1QTNF3-AMACR	139.707	7.51936	1.77187	4.24374	2.19826e-05	0.00372972	ENSG00000273294
CFP	32.5548	2.62337	0.618229	4.24336	2.20194e-05	0.00372972	ENSG00000126759
LINC02055	15.758	-5.7886	1.36642	-4.23632	2.27216e-05	0.00381302	ENSG00000254101
HDAC6	4493.33	0.743198	0.175633	4.23154	2.32093e-05	0.00385913	ENSG00000094631
AC010343.1	180.382	-1.78002	0.421204	-4.22601	2.37869e-05	0.0039125	ENSG00000240376
NUDT11	2194.49	0.826576	0.195669	4.22436	2.3962e-05	0.0039125	ENSG00000196368
GRIN3A	1472.02	-5.17277	1.22543	-4.22118	2.43031e-05	0.00393277	ENSG00000198785
GABRA2	360.382	-10.3764	2.46301	-4.2129	2.5211e-05	0.00402597	ENSG00000151834
TSPYL5	1678.27	-0.933168	0.221555	-4.2119	2.53233e-05	0.00402597	ENSG00000180543
ERCC5	749.609	1.02064	0.242632	4.20656	2.5929e-05	0.00405118	ENSG00000134899
PAK6	502.58	1.15495	0.274445	4.20829	2.57311e-05	0.00405118	ENSG00000137843
PCDHGA8	41.3494	3.52227	0.83961	4.19513	2.72717e-05	0.00422455	ENSG00000253767
AP005242.4	20.4438	-5.5214	1.31866	-4.18712	2.8251e-05	0.00433917	ENSG00000279042
SAPCD2	216.597	-1.23203	0.294471	-4.18387	2.86586e-05	0.00436478	ENSG00000186193
CYGB	624.425	-0.831044	0.19876	-4.18113	2.90059e-05	0.00436577	ENSG00000161544
LRRC24	446.803	-0.711371	0.170183	-4.18003	2.91469e-05	0.00436577	ENSG00000254402
A1BG-AS1	248.982	-1.15943	0.278177	-4.16798	3.07311e-05	0.00456533	ENSG00000268895
AC116533.1	637.027	-0.71593	0.172092	-4.16016	3.18022e-05	0.00468604	ENSG00000244398
AFF2	2846.99	0.589881	0.14245	4.14098	3.45832e-05	0.00502568	ENSG00000155966
VAMP7	943.857	0.817629	0.19756	4.13863	3.4939e-05	0.00502568	ENSG00000124333
ZBTB33	2230.34	0.757208	0.18291	4.13978	3.47634e-05	0.00502568	ENSG00000177485
AC020951.1	17.0348	-5.78541	1.39928	-4.13457	3.55616e-05	0.00507494	ENSG00000278897
SLC16A2	5476.15	0.877511	0.212616	4.12722	3.67178e-05	0.00519901	ENSG00000147100
KRBOX4	647.893	0.878607	0.213192	4.1212	3.76898e-05	0.00525454	ENSG00000147121
XIAP	3489.51	1.0797	0.261965	4.12155	3.76326e-05	0.00525454	ENSG00000101966
AC125611.4	569.406	-1.42255	0.345594	-4.11626	3.85071e-05	0.0053275	ENSG00000258334
KCNJ6	1166.98	0.630387	0.15324	4.11372	3.89336e-05	0.0053457	ENSG00000157542
GOLGA8B	2670.17	0.548123	0.133666	4.10068	4.1193e-05	0.0056134	ENSG00000215252
KHDRBS2	198.61	-9.49725	2.33283	-4.07113	4.67866e-05	0.00632807	ENSG00000112232
MED14	1879.57	0.803237	0.197799	4.06088	4.88876e-05	0.00656325	ENSG00000180182
KRT18P48	34.1446	2.05947	0.507607	4.05721	4.96626e-05	0.00661827	ENSG00000217889
DDR2	144.275	1.34662	0.332374	4.05152	5.08866e-05	0.00666178	ENSG00000162733
SLC25A14	1172.09	0.737747	0.182134	4.05058	5.10918e-05	0.00666178	ENSG00000102078
SMARCA1	3725.26	0.92643	0.228565	4.05325	5.05112e-05	0.00666178	ENSG00000102038
CBFB	4980.77	-0.908785	0.224631	-4.04567	5.21728e-05	0.00673089	ENSG00000067955
RASGRF1	485.229	0.973206	0.240606	4.04481	5.23646e-05	0.00673089	ENSG00000058335
NDUFB11	3206.79	0.588266	0.1459	4.03199	5.53064e-05	0.00705896	ENSG00000147123
PARP4	352.887	-0.886513	0.220007	-4.02947	5.59032e-05	0.00708524	ENSG00000102699
IDS	33701.7	0.807832	0.200988	4.01931	5.8368e-05	0.00734626	ENSG00000010404
RAB9B	2014.17	0.801696	0.199716	4.01418	5.9652e-05	0.00745608	ENSG00000123570
SERTM1	93.8672	1.75928	0.439128	4.00629	6.16794e-05	0.0076567	ENSG00000180440
CST3	1766.29	-0.663824	0.165907	-4.00119	6.30253e-05	0.00766624	ENSG00000101439
MIR4458HG	238.111	-7.93081	1.98059	-4.00427	6.22089e-05	0.00766624	ENSG00000247516
TSPAN7	9123.67	0.857344	0.214226	4.00205	6.27963e-05	0.00766624	ENSG00000156298
SMIM10L2A	2937.52	1.04171	0.260813	3.99409	6.49431e-05	0.00784686	ENSG00000178947
PDE4B	2994.82	-0.515436	0.12916	-3.99068	6.58843e-05	0.00790786	ENSG00000184588
SEL1L3	1400.5	-0.674068	0.169743	-3.97112	7.1537e-05	0.00852984	ENSG00000091490
PRKCE	5243.43	-0.741716	0.186856	-3.96946	7.20344e-05	0.00853302	ENSG00000171132
FOXN3	1639.59	-0.490082	0.123725	-3.96105	7.46205e-05	0.00866938	ENSG00000053254
LHFPL3	206.098	-1.33599	0.337164	-3.96243	7.41909e-05	0.00866938	ENSG00000187416
PAPPA	598.083	0.87085	0.21978	3.96237	7.42085e-05	0.00866938	ENSG00000182752
PGRMC1	11116.2	0.818132	0.206641	3.95921	7.51996e-05	0.008681	ENSG00000101856
FAM110C	18.6409	3.25772	0.823805	3.95448	7.67025e-05	0.00879845	ENSG00000184731
ATP5PB	3118.04	-0.54657	0.138312	-3.95174	7.75866e-05	0.0088439	ENSG00000116459
CCDC144NL	11.8104	5.4364	1.37669	3.94889	7.85139e-05	0.00889366	ENSG00000205212
BMS1P10	48.3879	2.00044	0.507203	3.94407	8.01113e-05	0.00901824	ENSG00000237238
AL390800.1	15.3464	4.85438	1.23221	3.93958	8.16244e-05	0.00907583	ENSG00000286099
CTSF	182.654	-9.5467	2.42272	-3.94049	8.13149e-05	0.00907583	ENSG00000174080
DLL3	968.338	-0.737184	0.187236	-3.9372	8.24394e-05	0.00909504	ENSG00000090932
ZNF257	15.8798	-5.23977	1.33119	-3.93615	8.28008e-05	0.00909504	ENSG00000197134
MDM4	1105.74	0.615745	0.156529	3.93373	8.36361e-05	0.00913145	ENSG00000198625
IQSEC2	1075.36	1.04852	0.26728	3.92291	8.74841e-05	0.00949439	ENSG00000124313
NAA10	1713.09	0.620336	0.158283	3.91915	8.88629e-05	0.00958661	ENSG00000102030
AC245452.1	356.371	-1.08601	0.277229	-3.91739	8.95143e-05	0.00959974	ENSG00000224086
EBF1	5128.63	-0.661633	0.169228	-3.9097	9.24099e-05	0.00985199	ENSG00000164330
SPIN2A	146.241	1.26903	0.324847	3.90655	9.36223e-05	0.00992286	ENSG00000147059
ALS2CL	76.2458	1.558	0.399934	3.89566	9.79333e-05	0.0103194	ENSG00000178038
TCEAL6	41.0022	-2.52383	0.64823	-3.89342	9.88418e-05	0.010355	ENSG00000204071
SPIN2B	538.109	0.87381	0.224682	3.8891	0.000100617	0.0104804	ENSG00000186787
MYO7A	409.571	0.94936	0.244221	3.8873	0.000101364	0.0104979	ENSG00000137474
TMEM189-UBE2V1	490.068	-13.5365	3.48557	-3.88358	0.00010293	0.0105994	ENSG00000124208
TXNRD2	248.456	0.990717	0.255246	3.88142	0.000103849	0.0106337	ENSG00000184470
AC104072.1	19.2846	-4.55676	1.17499	-3.87814	0.000105259	0.0106576	ENSG00000260878
PDZD4	14772.4	0.835233	0.21533	3.87885	0.000104951	0.0106576	ENSG00000067840
GABRB2	263.491	1.40015	0.3628	3.85928	0.000113722	0.0114506	ENSG00000145864
POTEF	58.5472	5.89041	1.52962	3.8509	0.000117687	0.0117843	ENSG00000196604
AL021395.1	85.7636	-7.25862	1.90061	-3.81911	0.000133934	0.0132645	ENSG00000233508
MECP2	6128.89	0.82549	0.216098	3.81999	0.000133459	0.0132645	ENSG00000169057
SLC16A5	18.7025	-5.82031	1.5253	-3.81584	0.000135719	0.0133683	ENSG00000170190
FAT3	2961.07	0.632081	0.165803	3.81225	0.000137708	0.0134909	ENSG00000165323
CNN2	189.223	-1.79545	0.471717	-3.80621	0.000141115	0.0137503	ENSG00000064666
OCRL	4576.83	0.745354	0.196098	3.80092	0.000144158	0.0139718	ENSG00000122126
EPHA3	2258.19	-0.737161	0.194433	-3.79133	0.000149843	0.0142621	ENSG00000044524
ERVK13-1	689.644	0.526791	0.138938	3.79154	0.000149715	0.0142621	ENSG00000260565
RBP1	2523.99	-0.659582	0.173961	-3.79155	0.000149711	0.0142621	ENSG00000114115
SLC35A3	401.43	0.902689	0.238141	3.79057	0.000150301	0.0142621	ENSG00000117620
FAM53A	16.0122	3.59655	0.95011	3.7854	0.000153461	0.0144861	ENSG00000174137
MEG8	66.9717	9.26354	2.44984	3.78128	0.000156025	0.0146518	ENSG00000225746
NGFR	7216.47	-0.87832	0.232497	-3.77777	0.000158239	0.0147263	ENSG00000064300
SEPTIN5	6604.54	-0.519408	0.137537	-3.77648	0.00015906	0.0147263	ENSG00000184702
ZNF728	92.1334	-8.55005	2.26421	-3.77617	0.000159256	0.0147263	ENSG00000269067
GRM8	818.304	0.820522	0.217454	3.77332	0.000161088	0.0148201	ENSG00000179603
ZNF711	3273.25	0.730631	0.193728	3.77143	0.000162316	0.0148577	ENSG00000147180
AC097652.1	28.2693	3.66544	0.974805	3.76017	0.000169795	0.0154642	ENSG00000250658
PIK3CD	1174.53	-0.643048	0.171137	-3.75749	0.000171624	0.0154752	ENSG00000171608
ZNF676	87.8874	-8.45944	2.25065	-3.75867	0.000170822	0.0154752	ENSG00000196109
HNRNPUL2-BSCL2	554.059	-7.05679	1.88004	-3.75353	0.00017436	0.0156441	ENSG00000234857
MIR4435-2HG	245.464	1.03373	0.275574	3.75117	0.000176013	0.0157146	ENSG00000172965
AC007744.1	282.798	-0.764315	0.204052	-3.74568	0.000179905	0.0159193	ENSG00000271894
FMR1	1849.57	0.834473	0.222796	3.74546	0.000180062	0.0159193	ENSG00000102081
P2RY1	139.967	1.63193	0.436106	3.74205	0.000182527	0.0160588	ENSG00000169860
MTMR1	1467.07	0.750924	0.201421	3.72814	0.000192899	0.0167378	ENSG00000063601
SPIN3	1945.9	0.661603	0.177425	3.72893	0.000192298	0.0167378	ENSG00000204271
TSHZ2	32.1419	-2.84773	0.763879	-3.72799	0.000193015	0.0167378	ENSG00000182463
SLC5A3	2017.98	0.580258	0.155806	3.72423	0.000195911	0.016908	ENSG00000198743
TMEM185A	1097.82	0.823317	0.221215	3.7218	0.000197805	0.0169906	ENSG00000269556
MDGA2	623.175	0.680331	0.183488	3.70778	0.000209084	0.0177908	ENSG00000139915
SEMA5A	1160.47	0.773863	0.20869	3.7082	0.00020874	0.0177908	ENSG00000112902
CD226	41.7972	2.5584	0.691136	3.70173	0.000214137	0.0178849	ENSG00000150637
CHST12	847.815	-1.09889	0.296705	-3.70363	0.000212532	0.0178849	ENSG00000136213
KCTD12	3413.81	0.552216	0.149132	3.70286	0.000213181	0.0178849	ENSG00000178695
TACR3	162.103	1.09903	0.296694	3.70424	0.000212029	0.0178849	ENSG00000169836
NEDD4L	7755.89	-0.411065	0.111775	-3.67761	0.000235425	0.0194968	ENSG00000049759
UBQLN2	5701.95	0.673217	0.183067	3.67744	0.000235588	0.0194968	ENSG00000188021
AC012349.1	11.4601	-5.35877	1.46078	-3.66842	0.00024405	0.0201053	ENSG00000254254
PROX1	1294.03	0.663052	0.180809	3.66714	0.000245281	0.0201153	ENSG00000117707
LINC00893	104.631	1.46426	0.399875	3.66178	0.000250465	0.0204479	ENSG00000241769
CCNJL	982.55	-0.489423	0.133759	-3.65899	0.000253207	0.020579	ENSG00000135083
PLCXD3	925.147	-4.47537	1.22363	-3.65745	0.000254741	0.0206113	ENSG00000182836
CEBPZOS	766.686	0.559695	0.153517	3.64581	0.000266547	0.0208228	ENSG00000218739
MMP11	635.492	-0.720967	0.197571	-3.64916	0.000263095	0.0208228	ENSG00000099953
NBDY	2091.95	0.645824	0.177003	3.64867	0.000263602	0.0208228	ENSG00000204272
NPIPB12	182.184	-1.33276	0.365549	-3.64592	0.000266436	0.0208228	ENSG00000169203
ONECUT1	1444.64	0.67404	0.184581	3.65174	0.000260474	0.0208228	ENSG00000169856
RMST	604.232	0.705458	0.193143	3.65251	0.000259687	0.0208228	ENSG00000255794
WARS	3992.69	-0.570566	0.156448	-3.64701	0.000265307	0.0208228	ENSG00000140105
ZNF674-AS1	215.599	1.30386	0.357219	3.65003	0.000262213	0.0208228	ENSG00000230844
GPRASP2	4153.8	0.784618	0.215667	3.6381	0.000274659	0.0213585	ENSG00000158301
UNC13C	64.6688	-8.04468	2.21186	-3.63707	0.000275761	0.0213585	ENSG00000137766
FAM156B	883.688	0.836037	0.229979	3.63527	0.000277687	0.0214162	ENSG00000179304
BCLAF3	1164.01	0.650801	0.179153	3.63266	0.000280517	0.0215428	ENSG00000173681
DNAJC14	1079.12	0.493355	0.136004	3.6275	0.000286182	0.0218851	ENSG00000135392
CHRM4	256.539	-1.03246	0.285151	-3.62074	0.000293767	0.0223707	ENSG00000180720
AC006064.6	175.073	-12.5902	3.48564	-3.61203	0.000303812	0.0230046	ENSG00000285238
HAP1	833.227	0.679785	0.188237	3.61133	0.00030463	0.0230046	ENSG00000173805
FUNDC1	408.876	0.880601	0.244039	3.60844	0.000308045	0.0230703	ENSG00000069509
RAB40A	167.876	0.821262	0.227563	3.60895	0.000307439	0.0230703	ENSG00000172476
STAG2	1590.46	0.854917	0.237278	3.60301	0.000314548	0.0234604	ENSG00000101972
BEST1	300.643	1.09168	0.303422	3.59789	0.000320807	0.0238291	ENSG00000167995
USP27X	843.419	0.836556	0.23288	3.59222	0.000327873	0.0242545	ENSG00000273820
SYN1	6951.91	0.77295	0.215393	3.58856	0.000332513	0.0244979	ENSG00000008056
CYB5A	417.792	-0.687369	0.192053	-3.57905	0.000344842	0.0253033	ENSG00000166347
EFNB1	548.088	0.998526	0.280188	3.56377	0.000365569	0.0265023	ENSG00000090776
RFX7	1722.26	0.623767	0.174954	3.56533	0.000363397	0.0265023	ENSG00000181827
SUCNR1	76.2988	-1.60061	0.449006	-3.56479	0.000364152	0.0265023	ENSG00000198829
MYC	1673.96	-0.987563	0.277252	-3.56197	0.000368078	0.0265779	ENSG00000136997
BEX4	5124.14	0.737412	0.207132	3.56011	0.000370693	0.0266605	ENSG00000102409
AC008073.3	16.1124	-3.39073	0.953792	-3.555	0.000377975	0.0270767	ENSG00000276087
MAATS1	172.066	0.982453	0.276664	3.55107	0.000383674	0.0271629	ENSG00000183833
SDK2	1111.38	0.649059	0.182686	3.55286	0.000381061	0.0271629	ENSG00000069188
SNHG16	1705.62	-0.495592	0.13956	-3.55109	0.000383637	0.0271629	ENSG00000163597
FAM3A	1089.62	0.770396	0.217127	3.54814	0.000387966	0.0273599	ENSG00000071889
FTSJ1	1436.78	0.582914	0.164446	3.54472	0.000393025	0.0276093	ENSG00000068438
RGS6	222.158	1.23962	0.350276	3.53899	0.000401662	0.0278917	ENSG00000182732
S100A10	858.086	-1.07125	0.302692	-3.53909	0.000401513	0.0278917	ENSG00000197747
UAP1L1	163.257	-0.932004	0.263208	-3.54094	0.000398705	0.0278917	ENSG00000197355
ZXDB	959.669	0.759856	0.214841	3.53682	0.00040497	0.028014	ENSG00000198455
CCK	84.6272	2.03578	0.576253	3.53279	0.000411202	0.028337	ENSG00000187094
KIAA1217	88.4428	1.10142	0.312104	3.52902	0.000417098	0.0286344	ENSG00000120549
RPGR	170.967	1.05883	0.300724	3.52094	0.000430013	0.0294096	ENSG00000156313
CREB5	362.486	0.866966	0.246388	3.5187	0.000433668	0.0295481	ENSG00000146592
RYR1	236.886	1.20612	0.343003	3.51636	0.000437503	0.0296977	ENSG00000196218
ACAP2	869.155	0.4666	0.132828	3.51281	0.00044339	0.029985	ENSG00000114331
PCDHA13	53.9948	2.94452	0.838559	3.51141	0.000445736	0.0300316	ENSG00000239389
DAB1	1576.2	0.603693	0.172056	3.5087	0.000450302	0.0301154	ENSG00000173406
SLC5A4-AS1	483.732	1.07891	0.307458	3.50912	0.000449586	0.0301154	ENSG00000242082
BCAS3	682.271	-0.578068	0.165067	-3.50202	0.000461742	0.0305424	ENSG00000141376
CD36	276.329	0.848535	0.242174	3.50383	0.000458617	0.0305424	ENSG00000135218
PJA1	5474.02	0.699731	0.199802	3.50212	0.000461576	0.0305424	ENSG00000181191
AC093912.1	105.335	8.8229	2.52227	3.498	0.000468767	0.0307824	ENSG00000285876
GABARAP	5502.71	-0.411348	0.117594	-3.49805	0.000468671	0.0307824	ENSG00000170296
PORCN	916.835	0.840912	0.240716	3.49338	0.000476945	0.0311016	ENSG00000102312
TARBP1	833.514	0.624595	0.178797	3.49332	0.00047706	0.0311016	ENSG00000059588
EMD	1283.37	0.689731	0.197609	3.49038	0.00048233	0.0313324	ENSG00000102119
ZCCHC12	8628.42	0.750848	0.215377	3.4862	0.000489941	0.0317132	ENSG00000174460
TPPP3	809.8	-0.769373	0.22079	-3.48464	0.000492799	0.0317846	ENSG00000159713
AC003973.2	14.2718	-5.62185	1.61834	-3.47383	0.00051308	0.0329754	ENSG00000279377
MARVELD1	912.312	-0.515965	0.148699	-3.46987	0.000520719	0.0333481	ENSG00000155254
NHLH1	3865.15	-0.830898	0.23962	-3.46756	0.000525202	0.0335168	ENSG00000171786
GDI1	33084.4	0.606313	0.174976	3.46512	0.000529985	0.0335332	ENSG00000203879
MAGED1	26299	0.58083	0.167695	3.4636	0.000532994	0.0335332	ENSG00000179222
MSANTD1	81.3086	-1.53713	0.443891	-3.46285	0.000534492	0.0335332	ENSG00000188981
NEFM	148606	-0.670912	0.193679	-3.46404	0.00053213	0.0335332	ENSG00000104722
PPP1R17	960.966	-0.892916	0.257864	-3.46274	0.000534711	0.0335332	ENSG00000106341
BDNF	729.41	1.15484	0.333764	3.46004	0.000540087	0.0336376	ENSG00000176697
DUSP19	74.0186	1.11782	0.323006	3.46067	0.000538834	0.0336376	ENSG00000162999
DIAPH2	271.499	0.796702	0.231005	3.44885	0.000562977	0.0346111	ENSG00000147202
ONECUT2	11066.7	0.478815	0.13884	3.44867	0.000563356	0.0346111	ENSG00000119547
ZNF302	1190.02	-0.633706	0.183624	-3.45111	0.000558288	0.0346111	ENSG00000089335
ZNF559-ZNF177	279.971	-0.739286	0.214282	-3.45006	0.000560453	0.0346111	ENSG00000270011
C8orf58	217.521	-0.717508	0.208119	-3.44758	0.000565635	0.0346337	ENSG00000241852
FIGNL2	1788.74	-0.578943	0.168037	-3.44533	0.000570366	0.0348058	ENSG00000261308
GPR173	4256.41	0.599854	0.174536	3.43684	0.000588533	0.0357939	ENSG00000184194
LINC00632	625.811	0.830166	0.241683	3.43494	0.000592694	0.0358066	ENSG00000203930
STX2	1500.8	-0.52376	0.152463	-3.43533	0.000591836	0.0358066	ENSG00000111450
YY2	116.344	1.23589	0.359959	3.43341	0.000596043	0.0358893	ENSG00000230797
AIFM1	938.823	0.724066	0.210961	3.43222	0.000598652	0.0359271	ENSG00000156709
HTATSF1	4775.58	0.624537	0.182113	3.4294	0.000604913	0.036183	ENSG00000102241
SNCG	8616.61	-0.583751	0.170277	-3.42824	0.00060751	0.0362188	ENSG00000173267
AL390879.1	77.3363	1.43658	0.419217	3.42681	0.00061071	0.0362902	ENSG00000234062
SLC9A6	5294.9	0.740875	0.216476	3.42243	0.000620641	0.0367598	ENSG00000198689
KCNK9	852.536	-0.841925	0.246089	-3.42122	0.00062341	0.0368035	ENSG00000169427
CDKL5	2355.31	0.683109	0.199842	3.41824	0.000630271	0.0369677	ENSG00000008086
MLF1	431.594	-0.643424	0.188198	-3.41887	0.000628812	0.0369677	ENSG00000178053
IL1RAPL2	45.147	2.06735	0.606349	3.4095	0.000650816	0.0379273	ENSG00000189108
ZNF559	240.873	-1.17169	0.343651	-3.40953	0.000650742	0.0379273	ENSG00000188321
MOB3B	471.452	-0.8142	0.238952	-3.40738	0.000655903	0.0381013	ENSG00000120162
MALAT1	2953.79	0.491684	0.144407	3.40485	0.000662014	0.0382113	ENSG00000251562
NKRF	1452.58	0.640245	0.188011	3.40535	0.000660782	0.0382113	ENSG00000186416
TRPM3	587.556	0.682565	0.200652	3.40173	0.000669597	0.0385263	ENSG00000083067
FAM199X	4020.9	0.668058	0.196847	3.3938	0.000689307	0.0394267	ENSG00000123575
SLC9A7	6071.34	0.67166	0.197915	3.39368	0.000689597	0.0394267	ENSG00000065923
PENK	49.514	-8.05615	2.3757	-3.39106	0.000696222	0.0396803	ENSG00000181195
AF274858.1	195.964	1.04045	0.307154	3.38737	0.000705661	0.0398847	ENSG00000260081
BARHL2	319.719	0.800058	0.236097	3.38869	0.000702279	0.0398847	ENSG00000143032
SORCS1	737.471	0.838718	0.247623	3.38708	0.00070641	0.0398847	ENSG00000108018
TRMT2B	178.192	-0.778309	0.229954	-3.38463	0.000712732	0.0401166	ENSG00000188917
AC008543.1	48.3721	-1.68061	0.497105	-3.3808	0.000722757	0.0405549	ENSG00000197332
FBXO2	656.857	-0.562439	0.166542	-3.37716	0.000732381	0.0409681	ENSG00000116661
ACADVL	1702.52	0.637484	0.189489	3.36422	0.000767609	0.0424649	ENSG00000072778
L3MBTL1	946.945	0.533094	0.158385	3.3658	0.000763208	0.0424649	ENSG00000185513
SERPINI2	121.84	0.927368	0.275683	3.36389	0.000768511	0.0424649	ENSG00000114204
ZNF177	25.4198	-2.23854	0.665455	-3.36393	0.000768416	0.0424649	ENSG00000188629
SYP	21506.5	0.747824	0.222368	3.36301	0.000770975	0.0424716	ENSG00000102003
AC006059.2	40.4912	3.31058	0.984703	3.36201	0.000773769	0.0424964	ENSG00000280571
ZDHHC9	4779.77	0.690915	0.205787	3.35742	0.000786733	0.0430778	ENSG00000188706
ALG10B	481.222	0.766608	0.228421	3.35612	0.000790441	0.0431505	ENSG00000175548
HCG11	617.408	-0.526954	0.157246	-3.35115	0.000804775	0.043801	ENSG00000228223
TES	2219.63	-0.585858	0.175048	-3.34685	0.000817357	0.0443526	ENSG00000135269
PCSK2	2273.5	-0.64911	0.194094	-3.3443	0.000824898	0.0446282	ENSG00000125851
LINC01572	293.572	-0.773877	0.231581	-3.34171	0.000832644	0.04478	ENSG00000261008
MYO15A	76.4458	1.1433	0.342081	3.34219	0.000831187	0.04478	ENSG00000091536
AC008763.2	36.4926	2.15435	0.645927	3.33528	0.00085213	0.0454508	ENSG00000268400
FAAH2	81.6887	1.35094	0.404886	3.33659	0.000848127	0.0454508	ENSG00000165591
VMA21	4049.24	0.74113	0.22222	3.33512	0.000852641	0.0454508	ENSG00000160131
MX2	80.5489	2.11217	0.63377	3.33271	0.00086005	0.0457113	ENSG00000183486
AC107871.1	56.5174	1.3275	0.3993	3.32457	0.000885552	0.046521	ENSG00000260007
BIVM-ERCC5	457.799	-4.79214	1.44142	-3.32461	0.000885438	0.046521	ENSG00000270181
EIF4A1P10	118.352	-0.911205	0.273922	-3.32651	0.000879401	0.046521	ENSG00000229132
MED14OS	64.1715	1.15015	0.345955	3.32457	0.000885545	0.046521	ENSG00000234636
BCAP31	3538.86	0.598604	0.180179	3.32226	0.000892899	0.0465653	ENSG00000185825
C1GALT1C1	423.156	0.677727	0.203978	3.32256	0.000891959	0.0465653	ENSG00000171155
CUL4B	3459.99	0.673039	0.202607	3.32189	0.000894103	0.0465653	ENSG00000158290
BOC	33.0219	1.78254	0.53696	3.3197	0.000901148	0.0465955	ENSG00000144857
EZR	591.936	-1.06292	0.320267	-3.31886	0.000903845	0.0465955	ENSG00000092820
GDF15	54.2955	2.16738	0.652722	3.32053	0.000898477	0.0465955	ENSG00000130513
MORF4L2	12055.9	0.585967	0.176575	3.31852	0.000904967	0.0465955	ENSG00000123562
CNTN4	259.121	-3.46029	1.04302	-3.31758	0.000908023	0.0466204	ENSG00000144619
PCDHGA10	356.989	-1.22331	0.369166	-3.31371	0.000920655	0.0471355	ENSG00000253846
ECI1	413.579	-0.64074	0.193606	-3.3095	0.000934629	0.0477161	ENSG00000167969
RPL39	2510.29	0.593328	0.179343	3.30834	0.000938521	0.0477802	ENSG00000198918
TPD52	2952.51	-0.534784	0.161967	-3.30181	0.000960637	0.0487691	ENSG00000076554
TCEAL7	1287.97	0.940945	0.285088	3.30054	0.000964978	0.0488527	ENSG00000182916
NUDT10	1020.66	0.636698	0.19307	3.29776	0.000974589	0.0490771	ENSG00000122824
RBFOX1	3363.61	-0.798996	0.242289	-3.29769	0.000974826	0.0490771	ENSG00000078328
CACNA1E	6089.88	0.565054	0.171407	3.29657	0.000978749	0.0491381	ENSG00000198216
URGCP-MRPS24	71.9057	-7.71835	2.3433	-3.29379	0.000988447	0.0494879	ENSG00000270617
AC245297.1	1562.65	-0.567142	0.172254	-3.29247	0.000993099	0.0495838	ENSG00000215861
MMGT1	2653.2	0.692236	0.210301	3.29164	0.000996041	0.0495941	ENSG00000169446
COL11A2	237.519	0.768989	0.233757	3.28969	0.00100297	0.0498023	ENSG00000204248
FRG1BP	390.506	-0.729203	0.221772	-3.28808	0.00100873	0.0499512	ENSG00000149531
AC098582.1	36.6111	2.61536	0.795718	3.28679	0.00101337	0.0499539	ENSG00000287542
PIK3IP1	413.735	-0.668792	0.203495	-3.28653	0.00101429	0.0499539	ENSG00000100100
BCAM	592.239	-0.694673	0.211532	-3.28401	0.00102341	0.0502665	ENSG00000187244
PHC2	3793.53	-0.326102	0.0993493	-3.28238	0.00102935	0.0504215	ENSG00000134686
AC013394.1	31.3893	-1.95927	0.597132	-3.28113	0.00103392	0.050509	ENSG00000279765
FAM122B	508.265	0.729022	0.22259	3.27518	0.00105596	0.0514468	ENSG00000156504
ALG6	286.931	0.681553	0.208192	3.27367	0.0010616	0.051583	ENSG00000088035
FGFRL1	49.4142	1.75977	0.538267	3.26932	0.00107808	0.05214	ENSG00000127418
MEG9	98.8488	4.69684	1.43673	3.26912	0.00107882	0.05214	ENSG00000223403
MICALL2	468.911	0.773066	0.236691	3.26614	0.00109025	0.0525522	ENSG00000164877
ADRA1B	182.271	0.891589	0.273329	3.26196	0.00110645	0.0531915	ENSG00000170214
PCDHA5	666.233	-4.83611	1.4832	-3.26059	0.00111181	0.0533078	ENSG00000204965
CHM	1474.65	0.487069	0.149527	3.2574	0.00112439	0.0537692	ENSG00000188419
CSMD3	992.385	0.756827	0.232489	3.25533	0.00113261	0.0540196	ENSG00000164796
VN1R110P	28.5542	2.06261	0.633866	3.25401	0.00113788	0.0541283	ENSG00000231725
PLCB3	547.767	-1.00982	0.310525	-3.25199	0.001146	0.054255	ENSG00000149782
SPON1	369.427	1.18327	0.363874	3.25186	0.00114653	0.054255	ENSG00000262655
RPL10	8545.65	-0.490392	0.150938	-3.24896	0.00115828	0.0546686	ENSG00000147403
DNAH9	287.011	0.671082	0.20678	3.24539	0.00117289	0.0552142	ENSG00000007174
MEIS1	231.156	-0.88903	0.274185	-3.24245	0.00118506	0.0556426	ENSG00000143995
HACE1	585.227	0.525154	0.162161	3.23848	0.00120168	0.0562772	ENSG00000085382
RBMX2	434.388	0.803235	0.248085	3.23774	0.0012048	0.0562779	ENSG00000134597
CCNQ	694.772	0.642777	0.198911	3.23148	0.00123149	0.0572298	ENSG00000262919
RPS4X	8620.07	0.474133	0.146691	3.23219	0.00122845	0.0572298	ENSG00000198034
SLITRK2	33.4943	-6.75485	2.09145	-3.22975	0.00123898	0.0574304	ENSG00000185985
PLCD3	130.921	0.968791	0.30003	3.22898	0.00124231	0.0574379	ENSG00000161714
AC002310.4	47.2267	-8.80558	2.7298	-3.22573	0.00125653	0.0579477	ENSG00000261459
PTPN9	3338.56	-0.368206	0.114227	-3.22345	0.00126656	0.0582618	ENSG00000169410
AC010247.2	662.181	-0.591137	0.183651	-3.21881	0.00128722	0.0590624	ENSG00000259436
ZNF704	3507.56	0.665117	0.206712	3.21761	0.00129265	0.0591617	ENSG00000164684
HSFX2	100.438	1.30916	0.407079	3.21597	0.00130002	0.0593492	ENSG00000268738
SPRY2	2920.55	-0.765705	0.238406	-3.21177	0.00131918	0.0600723	ENSG00000136158
TAC1	2983.35	0.774589	0.241285	3.21026	0.00132615	0.0602385	ENSG00000006128
CPNE3	1759.96	-0.606793	0.189106	-3.20874	0.00133317	0.0604058	ENSG00000085719
ATP11C	2693	0.652191	0.20342	3.20613	0.00134533	0.0606534	ENSG00000101974
CHST8	2881.9	-0.453677	0.141475	-3.20677	0.00134236	0.0606534	ENSG00000124302
TRIM7	57.408	-1.29968	0.405688	-3.20365	0.00135699	0.0610274	ENSG00000146054
FGFR1	3397.59	0.578025	0.180502	3.20232	0.00136327	0.0611582	ENSG00000077782
ATP10D	69.5951	-4.52319	1.41407	-3.1987	0.00138051	0.061475	ENSG00000145246
BEX2	4143.42	0.662426	0.207041	3.1995	0.00137666	0.061475	ENSG00000133134
CHRM3	742.334	0.70417	0.220118	3.19905	0.00137882	0.061475	ENSG00000133019
GPKOW	650.749	0.784998	0.245469	3.19796	0.00138404	0.0614814	ENSG00000068394
STRA6	32.6108	2.16811	0.678205	3.19683	0.00138946	0.0615709	ENSG00000137868
COL11A1	165.117	1.45938	0.456777	3.19495	0.00139855	0.0616724	ENSG00000060718
TMEM159	637.444	-0.60038	0.187915	-3.19496	0.00139851	0.0616724	ENSG00000011638
DNAH6	172.293	0.76834	0.240762	3.19129	0.00141641	0.0623082	ENSG00000115423
ZNF26	238.961	-0.943728	0.296184	-3.18629	0.00144108	0.06324	ENSG00000198393
TMEM132B	737.33	0.535759	0.168241	3.18447	0.0014502	0.0634865	ENSG00000139364
PLXDC2	689.729	0.47807	0.15021	3.18268	0.00145919	0.0636194	ENSG00000120594
WDR86	1352.07	-0.555766	0.174634	-3.18247	0.00146026	0.0636194	ENSG00000187260
ANKRD20A7P	13.5446	-3.89062	1.2228	-3.18174	0.00146394	0.0636268	ENSG00000236816
ACOT2	254.704	-1.14477	0.360142	-3.17867	0.00147953	0.0641509	ENSG00000119673
SLC6A8	2343.38	0.574005	0.180636	3.17769	0.00148451	0.0642131	ENSG00000130821
LUZP2	440.437	0.585732	0.184581	3.1733	0.00150714	0.0650368	ENSG00000187398
UBALD2	769.362	-0.519616	0.163955	-3.16925	0.00152831	0.0657934	ENSG00000185262
PIGA	287.279	0.810838	0.255967	3.16775	0.00153625	0.0658225	ENSG00000165195
UBE2A	2551.91	0.639538	0.20188	3.1679	0.00153542	0.0658225	ENSG00000077721
AF106564.1	1176.94	0.749233	0.236821	3.16371	0.00155774	0.0664187	ENSG00000272163
PDE1C	244.806	-1.51431	0.478662	-3.16364	0.00155811	0.0664187	ENSG00000154678
SLC7A14	1579.17	0.683735	0.216162	3.16307	0.00156116	0.0664187	ENSG00000013293
STK26	114.037	1.23389	0.390321	3.16122	0.0015711	0.0665294	ENSG00000134602
TM7SF2	3173.03	-0.340106	0.107571	-3.16169	0.00156859	0.0665294	ENSG00000149809
HMGB3	4752.82	0.489068	0.15477	3.15996	0.00157791	0.0666622	ENSG00000029993
ADGRV1	171.236	0.984348	0.311892	3.15605	0.00159922	0.0674052	ENSG00000164199
CHST1	1406.85	0.689148	0.218584	3.15279	0.00161719	0.0675345	ENSG00000175264
DDTL	196.365	-1.12519	0.356788	-3.15366	0.00161239	0.0675345	ENSG00000099974
L1CAM	40009.3	0.55069	0.174649	3.15312	0.00161536	0.0675345	ENSG00000198910
NSA2	1052.64	-0.391668	0.124151	-3.15478	0.00160619	0.0675345	ENSG00000164346
AC022424.1	93.5295	1.08567	0.344455	3.15184	0.00162246	0.0675987	ENSG00000250579
ITGA2B	77.5208	1.03683	0.329035	3.15111	0.00162651	0.0676119	ENSG00000005961
BEX3	6782.19	0.671478	0.213231	3.14907	0.00163791	0.0679303	ENSG00000166681
GPR26	324.853	1.24419	0.395214	3.14813	0.00164317	0.0679926	ENSG00000154478
RPS28P7	1355.83	-0.359364	0.114187	-3.14714	0.00164876	0.0680688	ENSG00000227097
CRIP2	5710.63	-0.363763	0.115665	-3.14497	0.00166105	0.06842	ENSG00000182809
RBM41	435.825	0.629731	0.200708	3.13755	0.00170367	0.0700165	ENSG00000089682
LRRTM2	238.148	-1.23142	0.392692	-3.13585	0.00171358	0.0702647	ENSG00000146006
RHOXF1-AS1	16.354	3.20371	1.0219	3.13506	0.00171821	0.0702953	ENSG00000258545
ARHGAP29	58.3615	1.24506	0.397384	3.13315	0.00172938	0.0705931	ENSG00000137962
AC018688.1	17.8168	-2.9693	0.948056	-3.13199	0.00173627	0.070715	ENSG00000283443
CDKN1C	1791.51	-0.728935	0.232831	-3.13074	0.00174364	0.0708561	ENSG00000129757
BHLHB9	735.058	0.913781	0.292691	3.12201	0.00179624	0.0728299	ENSG00000198908
KCND2	802.339	0.44556	0.142813	3.11988	0.00180924	0.0731935	ENSG00000184408
EEF1A1P5	5186.01	-0.522006	0.167435	-3.11767	0.00182285	0.0735736	ENSG00000196205
TCEAL9	536.042	0.885743	0.284161	3.11704	0.00182676	0.0735736	ENSG00000185222
AL049838.1	225.654	-0.621281	0.199492	-3.11432	0.00184369	0.0740908	ENSG00000259969
ADRA2A	1217.72	0.495348	0.159304	3.10945	0.00187434	0.0750894	ENSG00000150594
GABRB1	38.9643	-6.76877	2.17711	-3.10906	0.00187682	0.0750894	ENSG00000163288
GABRG1	49.0538	-7.07304	2.27591	-3.10778	0.00188498	0.0752497	ENSG00000163285
CCDC160	60.6061	1.29446	0.416741	3.10616	0.00189537	0.0753326	ENSG00000203952
NKAP	980.181	0.681053	0.219228	3.1066	0.00189252	0.0753326	ENSG00000101882
CDK19	816.94	-0.449592	0.144879	-3.10323	0.00191421	0.0757491	ENSG00000155111
PTCHD1	306.683	1.10897	0.357343	3.10339	0.00191318	0.0757491	ENSG00000165186
SLC25A5	3607.53	0.5286	0.170402	3.10208	0.00192164	0.0758776	ENSG00000005022
SRSF12	942.204	0.406405	0.131151	3.09877	0.00194329	0.0765655	ENSG00000154548
RALGDS	11103.4	-0.393675	0.127178	-3.09547	0.00196501	0.0772535	ENSG00000160271
IKBKG	421.78	0.668855	0.216334	3.09177	0.00198968	0.077837	ENSG00000269335
MMP2	1140.8	-0.846566	0.273899	-3.09079	0.00199623	0.077837	ENSG00000087245
RADX	1720.5	1.41711	0.45827	3.09229	0.00198618	0.077837	ENSG00000147231
TCEAL8	1393.71	0.617431	0.199799	3.09025	0.00199985	0.077837	ENSG00000180964
ZNF528-AS1	329.392	-2.38281	0.771127	-3.09004	0.00200133	0.077837	ENSG00000269834
GUCY1A2	1145.27	0.76412	0.247391	3.08871	0.00201027	0.0779621	ENSG00000152402
ZNF558	310.577	10.9106	3.53289	3.08829	0.00201315	0.0779621	ENSG00000167785
EPHA7	749.956	0.483197	0.156504	3.08744	0.00201885	0.0780164	ENSG00000135333
KCNK12	862.293	0.807795	0.261721	3.08647	0.00202547	0.0781055	ENSG00000184261
DGKK	575.715	0.856273	0.27753	3.08534	0.00203321	0.0781247	ENSG00000274588
RHOXF1P3	17.8957	-5.11969	1.65947	-3.08514	0.00203459	0.0781247	ENSG00000282933
LINC01301	30.5014	1.6373	0.531171	3.08243	0.00205316	0.0786711	ENSG00000251396
FAM157C	93.2697	1.07436	0.348848	3.07974	0.0020718	0.0790958	ENSG00000260528
JADE3	532.136	0.720625	0.234002	3.07957	0.00207297	0.0790958	ENSG00000102221
FAM50A	1751.12	0.50072	0.162745	3.07671	0.00209298	0.0791926	ENSG00000071859
JUP	7561.77	-0.470766	0.152967	-3.07757	0.00208698	0.0791926	ENSG00000173801
TSTD1	238.666	-0.751078	0.244114	-3.07676	0.00209266	0.0791926	ENSG00000215845
ZNF571-AS1	170.305	-1.75881	0.571574	-3.07712	0.00209008	0.0791926	ENSG00000267470
IGDCC3	2967.83	-0.356971	0.116062	-3.07568	0.0021002	0.0793	ENSG00000174498
AC006058.4	297.775	0.610839	0.198849	3.07187	0.00212721	0.0799865	ENSG00000280435
GPRASP1	1319.58	0.706347	0.229901	3.0724	0.00212348	0.0799865	ENSG00000198932
RPS8	8342.6	-0.37506	0.12215	-3.07049	0.00213705	0.0801902	ENSG00000142937
ADGRG4	44.876	1.42069	0.462926	3.06894	0.00214819	0.0804087	ENSG00000156920
RELN	1648.28	-0.895545	0.291856	-3.06845	0.00215174	0.0804087	ENSG00000189056
ARAF	359.949	0.729146	0.237696	3.06756	0.00215818	0.0804831	ENSG00000078061
MSC	936.355	-0.775346	0.253054	-3.06395	0.00218433	0.0812913	ENSG00000178860
CACNA1I	922.675	0.515698	0.168513	3.06028	0.00221127	0.081957	ENSG00000100346
RAB43	159.412	-1.28933	0.421228	-3.06088	0.00220688	0.081957	ENSG00000172780
AL008707.1	100.887	1.49676	0.489543	3.05747	0.00223212	0.082561	ENSG00000232599
HUWE1	17559.2	0.65379	0.213955	3.05574	0.00224507	0.082871	ENSG00000086758
AC012618.3	55.9445	-1.82705	0.598393	-3.05326	0.00226369	0.0828832	ENSG00000234773
EPHA4	2246.22	0.729641	0.238897	3.0542	0.0022566	0.0828832	ENSG00000116106
SCARF2	377.37	-0.90902	0.297584	-3.05467	0.0022531	0.0828832	ENSG00000244486
SLC18A3	2731.07	-0.72113	0.236158	-3.05358	0.00226125	0.0828832	ENSG00000187714
WDR45	888.018	0.511828	0.167667	3.05264	0.00226835	0.0828862	ENSG00000196998
ARHGAP20	163.864	0.902133	0.295827	3.04953	0.00229203	0.0830815	ENSG00000137727
PDRG1	995.025	-0.604875	0.198292	-3.05043	0.00228518	0.0830815	ENSG00000088356
RTN1	49328.8	-0.337876	0.110786	-3.0498	0.00228993	0.0830815	ENSG00000139970
SHC1	3033.07	-0.73705	0.241625	-3.05038	0.00228549	0.0830815	ENSG00000160691
CACNG3	331.614	0.983105	0.322536	3.04804	0.00230337	0.0831366	ENSG00000006116
KIF26A	2742.14	-0.516201	0.169346	-3.0482	0.00230215	0.0831366	ENSG00000066735
STXBP5	1204.93	0.467686	0.153464	3.04753	0.00230731	0.0831366	ENSG00000164506
AC091980.2	171.983	-1.28955	0.423584	-3.04439	0.00233156	0.0834611	ENSG00000275038
CHKB-CPT1B	923.451	0.770561	0.253143	3.04398	0.00233474	0.0834611	ENSG00000254413
PHLDA1	374.773	0.874578	0.287189	3.04531	0.00232442	0.0834611	ENSG00000139289
PPP2R1A	13422.5	-0.365115	0.119947	-3.04398	0.00233472	0.0834611	ENSG00000105568
GJD2	82.1373	1.10317	0.362987	3.03916	0.00237241	0.084641	ENSG00000159248
MAOB	92.1105	1.53361	0.50489	3.03751	0.00238538	0.0849364	ENSG00000069535
AHI1	1315.71	0.563038	0.185684	3.03224	0.00242746	0.0862652	ENSG00000135541
AL442128.2	17.5728	2.73991	0.904843	3.02805	0.00246136	0.0871807	ENSG00000277767
PRAF2	2714.62	0.481303	0.158959	3.02784	0.00246309	0.0871807	ENSG00000243279
PRSS16	12.5347	-3.56383	1.17724	-3.02728	0.00246765	0.0871807	ENSG00000112812
SCART1	36.944	1.87394	0.619284	3.02598	0.00247825	0.0873076	ENSG00000214279
UPF3B	1133.03	0.632559	0.209064	3.02566	0.00248088	0.0873076	ENSG00000125351
AC138035.2	16.5259	2.40795	0.797111	3.02085	0.0025207	0.0885208	ENSG00000250765
RFPL2	56.5248	1.59948	0.529575	3.02032	0.00252512	0.0885208	ENSG00000128253
BCL7A	2566.33	-0.36836	0.122029	-3.01863	0.00253919	0.0888423	ENSG00000110987
DUSP5P1	30.7793	-2.29999	0.762715	-3.01553	0.0025653	0.089583	ENSG00000183929
ATF4	5813.24	-0.311705	0.103613	-3.00835	0.00262669	0.0910252	ENSG00000128272
KCNJ2	192.98	0.795321	0.264356	3.00852	0.00262526	0.0910252	ENSG00000123700
TBL1X	778.491	0.613788	0.203977	3.0091	0.00262022	0.0910252	ENSG00000101849
YWHAE	22051.2	-0.347904	0.11563	-3.00877	0.00262309	0.0910252	ENSG00000108953
ABCB6	509.326	0.540114	0.17967	3.00614	0.00264591	0.091252	ENSG00000115657
NKTR	2669.12	0.317082	0.105457	3.00675	0.00264054	0.091252	ENSG00000114857
SORCS3	802.223	0.722494	0.240362	3.00586	0.00264834	0.091252	ENSG00000156395
LPAR3	22.2324	-2.69296	0.896167	-3.00497	0.00265603	0.0913434	ENSG00000171517
RNF125	1056.83	-0.718817	0.239773	-2.9979	0.00271844	0.0933126	ENSG00000101695
CASZ1	1143.58	-0.810241	0.270369	-2.9968	0.00272827	0.093394	ENSG00000130940
CHD7	2224.85	-0.415582	0.13869	-2.99648	0.00273112	0.093394	ENSG00000171316
NOL3	248.899	-0.819973	0.273734	-2.99551	0.0027399	0.0935177	ENSG00000140939
GRIA1	1239.33	0.750171	0.250551	2.99409	0.00275265	0.0937764	ENSG00000155511
HCRTR2	172.519	0.981391	0.327859	2.99333	0.00275952	0.093834	ENSG00000137252
DHRS4L2	135.424	0.75201	0.251484	2.99029	0.00278712	0.0945951	ENSG00000187630
GRIN2A	421.194	0.583832	0.195552	2.98557	0.00283055	0.0958895	ENSG00000183454
FAM120B	1791.99	-0.337961	0.113234	-2.98463	0.00283922	0.0960039	ENSG00000112584
AC027031.2	532.044	0.625441	0.209806	2.98105	0.00287261	0.096278	ENSG00000254615
AL117327.1	62.8049	1.44679	0.485157	2.9821	0.00286275	0.096278	ENSG00000281091
AP000459.2	267.883	-4.55042	1.52599	-2.98195	0.00286421	0.096278	ENSG00000228592
KLHL1	355.153	0.760818	0.25523	2.98091	0.00287389	0.096278	ENSG00000150361
NPNT	61.0606	1.89105	0.634212	2.98173	0.00286622	0.096278	ENSG00000168743
ADGRG1	3920.97	0.565633	0.189921	2.97825	0.002899	0.0965835	ENSG00000205336
CCDC22	506.238	0.628015	0.210839	2.97864	0.00289528	0.0965835	ENSG00000101997
STC2	160.738	-1.15921	0.389128	-2.979	0.00289189	0.0965835	ENSG00000113739
CNTFR	4413.18	-0.311575	0.104659	-2.97704	0.00291043	0.0967466	ENSG00000122756
GLIPR2	387.517	-0.5349	0.179788	-2.97517	0.00292826	0.0967466	ENSG00000122694
ITGAV	594.874	0.638171	0.214517	2.97493	0.00293058	0.0967466	ENSG00000138448
MAP3K14	437.948	0.555195	0.186615	2.97508	0.00292909	0.0967466	ENSG00000006062
PRKG1	1830.94	-0.628623	0.21123	-2.97601	0.00292023	0.0967466	ENSG00000185532
RBMS2	241.065	-0.699507	0.235355	-2.97214	0.00295734	0.0972755	ENSG00000076067
WDR44	1420.08	0.62583	0.210552	2.97233	0.00295554	0.0972755	ENSG00000131725
ATP6V1G2	2721.6	-0.387977	0.130754	-2.96724	0.00300488	0.0979145	ENSG00000213760
CILP2	80.8141	-0.981756	0.330758	-2.9682	0.00299546	0.0979145	ENSG00000160161
FANCB	19.6173	2.15251	0.725154	2.96835	0.00299406	0.0979145	ENSG00000181544
RALA	3009.55	-0.334801	0.112849	-2.9668	0.00300918	0.0979145	ENSG00000006451
SH3KBP1	2757.59	0.719822	0.242402	2.96954	0.00298249	0.0979145	ENSG00000147010
SLC9A3R1	302.57	-0.69462	0.234112	-2.96703	0.00300688	0.0979145	ENSG00000109062
LY6G5B	232.434	0.739773	0.249672	2.96297	0.00304682	0.0986082	ENSG00000240053
NR6A1	2058.81	-0.54761	0.184816	-2.963	0.00304655	0.0986082	ENSG00000148200
SIGIRR	218.999	-0.723516	0.244122	-2.96374	0.00303923	0.0986082	ENSG00000185187
OTUD3	670.512	0.430817	0.145498	2.96099	0.00306657	0.0990704	ENSG00000169914
NFE2L1	9043.57	-0.304143	0.102747	-2.96012	0.00307516	0.0991711	ENSG00000082641
THOC2	1666.09	0.559266	0.188989	2.95925	0.00308386	0.099275	ENSG00000125676
SKA2	1643.13	-0.324499	0.109829	-2.95458	0.003131	0.100614	ENSG00000182628
TCEAL1	667.116	0.630868	0.213629	2.9531	0.00314596	0.100916	ENSG00000172465
CXorf40B	643.23	0.695969	0.236033	2.94861	0.00319209	0.101855	ENSG00000197021
RPL9P7	466.478	-0.483942	0.164072	-2.94957	0.00318221	0.101855	ENSG00000238103
SOHLH2	71.9604	-1.10039	0.373141	-2.94898	0.00318819	0.101855	ENSG00000120669
NBL1	1583.98	-0.546346	0.18539	-2.947	0.00320869	0.102204	ENSG00000158747
BTBD6	1319.34	-0.379817	0.12905	-2.94318	0.00324855	0.103002	ENSG00000184887
GALNT16	2882.32	-0.331801	0.112728	-2.94339	0.00324643	0.103002	ENSG00000100626
LINC01201	71.1758	1.2241	0.415939	2.94297	0.00325078	0.103002	ENSG00000228659
IL16	22.4339	2.17371	0.73954	2.93927	0.00328982	0.103695	ENSG00000172349
LOXL3	162.895	-1.01246	0.344426	-2.93956	0.00328677	0.103695	ENSG00000115318
LRRC61	962.955	1.54616	0.52585	2.94031	0.00327879	0.103695	ENSG00000127399
CXorf56	708.133	0.551589	0.187805	2.93704	0.00331366	0.104084	ENSG00000018610
EDIL3	8140.48	-0.581199	0.197865	-2.93736	0.00331021	0.104084	ENSG00000164176
SMIM10L2B	1748.52	0.702763	0.239474	2.93461	0.00333965	0.10472	ENSG00000196972
NTRK2	7715.9	-0.453756	0.154717	-2.93282	0.00335899	0.105144	ENSG00000148053
RASSF6	44.1281	2.41037	0.822378	2.93098	0.00337899	0.105588	ENSG00000169435
ECHDC2	44.7036	1.23456	0.421308	2.9303	0.00338632	0.105635	ENSG00000121310
NAPRT	192.61	-0.757566	0.258661	-2.9288	0.00340275	0.105965	ENSG00000147813
PACSIN1	165.989	1.03021	0.351877	2.92775	0.0034142	0.106139	ENSG00000124507
AL591846.1	51.7852	-1.39672	0.477265	-2.9265	0.00342796	0.106384	ENSG00000224114
ACTR1A	7188.51	-0.301679	0.103114	-2.92568	0.00343708	0.106455	ENSG00000138107
CNTN1	17032.5	-0.347541	0.11883	-2.9247	0.00344788	0.106455	ENSG00000018236
GALNT17	1900.65	-0.545617	0.18653	-2.92509	0.00344353	0.106455	ENSG00000185274
AC092718.8	48.9115	-1.32941	0.454854	-2.92273	0.00346983	0.106731	ENSG00000284512
AL662884.1	83.4071	-7.98843	2.7341	-2.92178	0.00348035	0.106731	ENSG00000273333
HELZ2	654.019	-0.423966	0.14509	-2.92208	0.003477	0.106731	ENSG00000130589
TRPM7	911.891	0.441432	0.151078	2.92188	0.00347925	0.106731	ENSG00000092439
ZNF641	1008.43	0.39509	0.135267	2.9208	0.00349129	0.106885	ENSG00000167528
AC009630.1	16.968	-2.90807	0.996836	-2.9173	0.00353078	0.107835	ENSG00000253133
RHPN1	439.173	0.586882	0.201194	2.91699	0.00353422	0.107835	ENSG00000158106
RAB33A	1132.16	0.497961	0.170802	2.91543	0.00355202	0.108196	ENSG00000134594
RAI2	971.666	0.715266	0.245386	2.91486	0.00355848	0.108211	ENSG00000131831
A4GALT	752.992	-0.505971	0.173688	-2.9131	0.00357861	0.108595	ENSG00000128274
LYST	2366.38	0.336062	0.115378	2.91271	0.00358309	0.108595	ENSG00000143669
AC026954.2	74.519	-3.84189	1.31976	-2.91105	0.00360211	0.108989	ENSG00000261915
LINC00304	87.1501	0.900079	0.309528	2.90791	0.00363851	0.109907	ENSG00000180422
GPR50	30.9212	1.73375	0.596676	2.90569	0.00366449	0.110508	ENSG00000102195
DNAH1	242.038	0.846235	0.291966	2.8984	0.00375072	0.11292	ENSG00000114841
AL158055.1	166.274	1.17196	0.404727	2.89568	0.00378333	0.113713	ENSG00000226530
DMRT2	23.4204	2.23923	0.773826	2.89372	0.00380712	0.114239	ENSG00000173253
CLUL1	112.966	0.84935	0.293573	2.89315	0.00381405	0.114258	ENSG00000079101
FTL	10561.4	-0.374285	0.129442	-2.89153	0.00383376	0.11447	ENSG00000087086
SNHG29	5267.41	-0.500997	0.173234	-2.89202	0.00382779	0.11447	ENSG00000175061
SDSL	92.0968	1.4294	0.494458	2.89084	0.00384214	0.114531	ENSG00000139410
DPF2	2175.77	-0.328282	0.113655	-2.88842	0.00387186	0.115228	ENSG00000133884
CBLN1	1143.26	0.443034	0.153441	2.88732	0.00388535	0.115439	ENSG00000102924
KANTR	1187.95	0.788263	0.273144	2.88589	0.00390315	0.115778	ENSG00000232593
AL133352.1	113.68	7.57808	2.62813	2.88345	0.00393342	0.116486	ENSG00000255339
METRNL	512.774	-0.552388	0.191649	-2.88229	0.00394802	0.116727	ENSG00000176845
GNG3	5012.37	-0.47653	0.165394	-2.88118	0.00396194	0.116919	ENSG00000162188
NPR2	1049.49	-0.411271	0.142766	-2.88074	0.00396739	0.116919	ENSG00000159899
NUTM2F	14.2513	2.2464	0.780726	2.87732	0.0040107	0.117924	ENSG00000130950
TCEAL5	724.5	0.910085	0.316329	2.87702	0.00401452	0.117924	ENSG00000204065
COMT	775.361	0.593311	0.206587	2.87196	0.00407931	0.118483	ENSG00000093010
FGFR4	71.5613	1.20945	0.421016	2.87269	0.00406998	0.118483	ENSG00000160867
MAP1LC3B	9238.27	-0.404542	0.140832	-2.87251	0.00407219	0.118483	ENSG00000140941
NME2	1796.41	-0.405778	0.14119	-2.87398	0.00405336	0.118483	ENSG00000243678
OBI1-AS1	135.767	-1.23547	0.43007	-2.87272	0.0040695	0.118483	ENSG00000234377
STARD4-AS1	1350.22	0.569725	0.198201	2.87449	0.00404686	0.118483	ENSG00000246859
TPI1	5524.98	-0.268712	0.0935502	-2.87238	0.00407394	0.118483	ENSG00000111669
ANKRD36B	350.743	0.614464	0.214059	2.87053	0.00409786	0.118831	ENSG00000196912
C1RL	135.178	-0.893255	0.311677	-2.86596	0.00415743	0.120174	ENSG00000139178
C22orf42	189.259	0.938126	0.327322	2.86606	0.00415611	0.120174	ENSG00000205856
XKR7	4283.29	-0.586312	0.204661	-2.8648	0.00417278	0.120426	ENSG00000260903
RBMS1	3490.6	-0.487476	0.170221	-2.86378	0.00418621	0.120621	ENSG00000153250
GP1BB	845.614	-1.64834	0.575778	-2.86281	0.00419901	0.120798	ENSG00000203618
PTRHD1	246.316	-0.751659	0.262706	-2.86122	0.0042202	0.121215	ENSG00000184924
NTNG1	237.08	-0.617157	0.21575	-2.86051	0.00422957	0.121292	ENSG00000162631
ACACB	52.3311	1.12738	0.395029	2.85392	0.00431828	0.123446	ENSG00000076555
TSPEAR-AS1	106.751	1.73531	0.607976	2.85424	0.00431398	0.123446	ENSG00000235890
KAT2B	472.087	0.496987	0.174297	2.85138	0.00435304	0.124048	ENSG00000114166
TMEFF2	4905.95	-0.624635	0.219029	-2.85183	0.0043468	0.124048	ENSG00000144339
COL16A1	12.2789	3.16327	1.1096	2.85081	0.00436079	0.124074	ENSG00000084636
SPTLC1P1	12.342	2.90206	1.01846	2.84947	0.00437919	0.124402	ENSG00000230397
ZNF75D	547.392	0.665012	0.233452	2.8486	0.00439121	0.124548	ENSG00000186376
KLHL13	3017.72	0.536229	0.188419	2.84593	0.00442819	0.124804	ENSG00000003096
PAPPA2	3002.04	-2.25267	0.791507	-2.84605	0.00442653	0.124804	ENSG00000116183
PLB1	94.5086	0.931427	0.327203	2.84664	0.00441839	0.124804	ENSG00000163803
PRSS12	658.848	-0.738226	0.25944	-2.84546	0.00443468	0.124804	ENSG00000164099
SSX2IP	606.178	0.54529	0.19157	2.84643	0.0044212	0.124804	ENSG00000117155
AC078881.1	34.9358	2.16362	0.760814	2.84383	0.00445755	0.125254	ENSG00000250131
GUCY1A1	273.69	0.661557	0.23269	2.84308	0.00446793	0.125351	ENSG00000164116
TTYH1	103.834	1.23634	0.435444	2.83927	0.00452163	0.126662	ENSG00000167614
PERP	992.794	-0.462474	0.163069	-2.83605	0.00456747	0.127355	ENSG00000112378
SCARA3	107.275	0.942433	0.332217	2.8368	0.00455681	0.127355	ENSG00000168077
ZNF280C	395.659	0.764669	0.269623	2.83606	0.00456733	0.127355	ENSG00000056277
AL359736.1	56.9883	7.05788	2.49036	2.83408	0.00459585	0.127943	ENSG00000273167
DOK6	3823.34	0.33024	0.116544	2.8336	0.00460268	0.127943	ENSG00000206052
ACSBG1	94.9933	-1.39259	0.4916	-2.83277	0.0046146	0.128078	ENSG00000103740
HAPLN2	60.5909	1.3926	0.491871	2.83122	0.00463706	0.128505	ENSG00000132702
ELK1	902.848	0.567888	0.200736	2.82903	0.00466899	0.129192	ENSG00000126767
PLEKHD1	195.908	-0.744593	0.263262	-2.82833	0.0046791	0.129274	ENSG00000175985
RPL15	21297.7	-0.437194	0.154668	-2.82666	0.00470368	0.129756	ENSG00000174748
FAAP20	1176.87	-0.346628	0.122723	-2.82448	0.00473572	0.130441	ENSG00000162585
USH2A	51.202	1.16736	0.413541	2.82284	0.00476006	0.130913	ENSG00000042781
ATF5	1007.46	-0.589362	0.208971	-2.82031	0.00479773	0.131642	ENSG00000169136
BCL2L1	3664.16	-0.572516	0.203014	-2.82008	0.00480111	0.131642	ENSG00000171552
CAMKV	4725.95	0.580256	0.205826	2.81916	0.00481497	0.131726	ENSG00000164076
MORC4	78.5009	1.01972	0.361741	2.81891	0.00481872	0.131726	ENSG00000133131
CCNB3	76.6835	1.21997	0.432971	2.81768	0.00483722	0.132033	ENSG00000147082
PRPH	9737.79	-1.55707	0.55328	-2.81425	0.00488908	0.133248	ENSG00000135406
AC023509.1	56.0667	1.33743	0.475677	2.81162	0.00492921	0.134103	ENSG00000257379
SORBS3	47.2232	-1.80464	0.641939	-2.81123	0.00493527	0.134103	ENSG00000120896
DMD	615.874	0.682943	0.242982	2.81067	0.00494387	0.134136	ENSG00000198947
PELI1	1539.62	-0.587863	0.209212	-2.80989	0.00495582	0.134259	ENSG00000197329
DNAH7	85.5403	1.04064	0.370419	2.80935	0.00496419	0.134285	ENSG00000118997
LDB2	199.867	0.848373	0.302418	2.8053	0.00502699	0.135781	ENSG00000169744
BRINP3	969.042	0.67715	0.24154	2.80347	0.00505565	0.136352	ENSG00000162670
SMC1A	4778.53	0.520761	0.185908	2.80118	0.00509161	0.137118	ENSG00000072501
P2RX3	8655.19	-1.33468	0.476802	-2.79923	0.00512241	0.137673	ENSG00000109991
SEZ6	1122.46	0.491775	0.175702	2.79892	0.0051274	0.137673	ENSG00000063015
AC004057.1	199.855	-0.61976	0.221752	-2.79484	0.00519262	0.139066	ENSG00000196656
PPIA	15436.4	-0.285929	0.102311	-2.79471	0.00519464	0.139066	ENSG00000196262
DPY19L1	260.788	0.59441	0.212947	2.79136	0.00524876	0.140308	ENSG00000173852
KSR2	1211.79	0.399029	0.143129	2.7879	0.00530505	0.141604	ENSG00000171435
CCKBR	57.2645	1.18781	0.426345	2.78604	0.0053357	0.14216	ENSG00000110148
DACH1	4178.78	-0.534617	0.191949	-2.7852	0.00534943	0.14216	ENSG00000276644
DAPK1	4408.61	-0.384813	0.13816	-2.78526	0.00534841	0.14216	ENSG00000196730
FABP7	39.5683	1.86255	0.669026	2.78397	0.00536986	0.142494	ENSG00000164434
EIF4A1	9542.08	-0.346613	0.124608	-2.78162	0.00540879	0.142504	ENSG00000161960
FAM50B	167.554	-1.13935	0.409607	-2.78158	0.00540954	0.142504	ENSG00000145945
IQCA1	76.662	0.882105	0.317036	2.78235	0.00539669	0.142504	ENSG00000132321
RACK1	9050.85	-0.36092	0.129754	-2.78158	0.00540955	0.142504	ENSG00000204628
TUT4	1832.63	0.338633	0.121727	2.7819	0.00540421	0.142504	ENSG00000134744
LOXL1-AS1	84.4279	-0.882359	0.317301	-2.78082	0.0054221	0.142627	ENSG00000261801
LMX1A	14.5356	9.40256	3.38287	2.77947	0.00544484	0.143018	ENSG00000162761
FIBP	2398.92	-0.412758	0.148611	-2.77745	0.00547873	0.143147	ENSG00000172500
IKBKGP1	172.653	0.664855	0.239329	2.778	0.00546946	0.143147	ENSG00000275882
LRRC75B	780.567	-0.427163	0.153806	-2.77729	0.00548137	0.143147	ENSG00000178026
ZNF528	600.96	-1.61826	0.58266	-2.77736	0.00548027	0.143147	ENSG00000167555
GPR137C	1757.7	0.558293	0.201287	2.77362	0.00554371	0.144567	ENSG00000180998
NTNG2	1879.72	-0.607298	0.219057	-2.77232	0.00556577	0.144934	ENSG00000196358
PDGFRB	51.3518	1.23501	0.445772	2.7705	0.00559701	0.145538	ENSG00000113721
LRRC3B	1155.63	0.852981	0.308365	2.76614	0.0056724	0.147287	ENSG00000179796
SPOCK1	11762	-0.376359	0.136088	-2.76555	0.00568269	0.147343	ENSG00000152377
RPL13AP5	793.582	-0.551505	0.199704	-2.76161	0.00575173	0.14863	ENSG00000236552
RPL26	5475.66	-0.459227	0.166307	-2.76131	0.00575691	0.14863	ENSG00000161970
ZMAT2	1835.06	-0.355217	0.128602	-2.76215	0.00574222	0.14863	ENSG00000146007
ASB16	31.0293	1.53493	0.556274	2.7593	0.00579252	0.149199	ENSG00000161664
SLC22A23	2207.12	0.386195	0.139969	2.75914	0.00579542	0.149199	ENSG00000137266
LINC01139	129.394	3.6508	1.32384	2.75774	0.00582018	0.149624	ENSG00000215808
HSFX1	126.732	1.14559	0.415587	2.75655	0.00584149	0.149959	ENSG00000171116
BCAR3	306.742	-0.780751	0.28345	-2.75446	0.00587888	0.150281	ENSG00000137936
PIEZO2	4637.43	-2.27989	0.827512	-2.75512	0.00586712	0.150281	ENSG00000154864
PTPN1	4204.32	-0.363415	0.131929	-2.75463	0.00587581	0.150281	ENSG00000196396
SLC2A6	2078.2	-0.423808	0.153953	-2.75284	0.00590808	0.150814	ENSG00000160326
AC005833.1	160.796	-1.01229	0.368564	-2.74658	0.00602209	0.152244	ENSG00000255639
AL139424.2	137.05	-0.681523	0.248234	-2.74548	0.00604223	0.152244	ENSG00000284642
ANXA2P2	312.56	-0.989079	0.359829	-2.74875	0.00598236	0.152244	ENSG00000231991
ATP5ME	681.513	-0.408382	0.148782	-2.74483	0.00605417	0.152244	ENSG00000169020
CLMP	205.627	-0.716698	0.26112	-2.74471	0.00605649	0.152244	ENSG00000166250
CPLX1	1954.77	-0.451366	0.164349	-2.74638	0.00602564	0.152244	ENSG00000168993
EEF2	45123.5	-0.330809	0.120461	-2.74619	0.00602919	0.152244	ENSG00000167658
FRMPD2	16.5987	2.03741	0.7413	2.74843	0.00598813	0.152244	ENSG00000170324
PDZRN4	360.567	0.714712	0.26033	2.74541	0.00604353	0.152244	ENSG00000165966
RRNAD1	307.381	0.666646	0.242725	2.74651	0.00602331	0.152244	ENSG00000143303
ST3GAL5	1697.61	-0.341341	0.124314	-2.7458	0.00603634	0.152244	ENSG00000115525
ANKRD24	275.555	-0.786465	0.286601	-2.74411	0.00606752	0.15231	ENSG00000089847
RPL37AP1	40.4615	-1.22568	0.446895	-2.74267	0.00609426	0.152559	ENSG00000226243
SH3BGRL2	4303.23	-0.426824	0.155607	-2.74296	0.00608875	0.152559	ENSG00000198478
PGD	7347.99	-0.279878	0.102076	-2.74185	0.00610947	0.152728	ENSG00000142657
MMP1	38.6303	1.85438	0.676591	2.74077	0.00612956	0.153019	ENSG00000196611
C14orf132	16360	-0.430975	0.157284	-2.74011	0.00614185	0.153115	ENSG00000227051
GNAI1	4314.28	0.362945	0.132495	2.73931	0.00615683	0.153278	ENSG00000127955
FUT9	555.925	0.636386	0.232534	2.73674	0.00620508	0.154139	ENSG00000172461
TCEAL4	2242.02	0.575239	0.210205	2.73656	0.00620844	0.154139	ENSG00000133142
EHBP1L1	250.624	0.615425	0.225088	2.73416	0.00625396	0.155057	ENSG00000173442
AC078845.1	205.176	-0.950275	0.347637	-2.73353	0.006266	0.155143	ENSG00000232053
CXorf40A	539.946	0.710938	0.260235	2.73191	0.0062968	0.155693	ENSG00000197620
DYSF	614.211	-0.79488	0.291122	-2.7304	0.00632578	0.155884	ENSG00000135636
PHF6	2184.75	0.448775	0.164377	2.73016	0.00633033	0.155884	ENSG00000156531
RPE	549.442	-0.46587	0.170602	-2.73074	0.00631917	0.155884	ENSG00000197713
GRIPAP1	3753.72	0.597361	0.21922	2.72494	0.00643127	0.157739	ENSG00000068400
IRS1	1591.36	0.607799	0.223082	2.72456	0.00643873	0.157739	ENSG00000169047
MGAT5B	3015.54	-0.467588	0.171653	-2.72402	0.00644917	0.157739	ENSG00000167889
PRPS2	70.5149	1.23965	0.454966	2.72471	0.00643584	0.157739	ENSG00000101911
WWC3	890.825	0.692187	0.254085	2.72424	0.00644503	0.157739	ENSG00000047644
PTPRT	1590.71	-6.59601	2.42255	-2.72276	0.00647395	0.158132	ENSG00000196090
IFT57	1006.48	0.5071	0.186671	2.71654	0.00659678	0.160915	ENSG00000114446
FAM114A1	64.4958	1.66502	0.613044	2.71599	0.00660782	0.160968	ENSG00000197712
TMSB4X	40157.7	-0.321037	0.118252	-2.71486	0.00663032	0.161299	ENSG00000205542
ELAVL2	8802.77	-0.424701	0.156567	-2.71258	0.00667624	0.162199	ENSG00000107105
SCUBE3	1440.44	0.433064	0.159723	2.71135	0.0067009	0.16258	ENSG00000146197
WFDC1	17.3412	1.7861	0.658895	2.71075	0.00671307	0.162657	ENSG00000103175
KCNC2	1514.15	0.587428	0.216937	2.70783	0.00677249	0.163659	ENSG00000166006
2022-03-03	109.209	0.931768	0.344069	2.70809	0.00676725	0.163659	ENSG00000173926
COX10-AS1	550.934	0.455214	0.168157	2.70708	0.00678786	0.163812	ENSG00000236088
LINC00894	81.5803	1.15976	0.428617	2.70582	0.00681364	0.164216	ENSG00000235703
NR3C1	115.35	1.06247	0.392745	2.70523	0.00682562	0.164249	ENSG00000113580
USP27X-AS1	29.7278	1.49923	0.554271	2.70487	0.00683313	0.164249	ENSG00000234390
DLG2	560.075	0.458505	0.169623	2.70308	0.00687004	0.164807	ENSG00000150672
URAHP	41.0177	1.35509	0.501352	2.70286	0.00687452	0.164807	ENSG00000222019
PCDHA6	832.861	-4.80048	1.77716	-2.70122	0.00690866	0.165406	ENSG00000081842
LINC02588	14.8663	2.06397	0.765379	2.69667	0.00700374	0.167462	ENSG00000257842
FLRT1	396.669	0.470604	0.174602	2.6953	0.00703247	0.167753	ENSG00000126500
MCM7	955.438	-0.501631	0.186119	-2.69521	0.00703444	0.167753	ENSG00000166508
TMSB15B-AS1	69.0645	1.04616	0.388254	2.69453	0.00704888	0.167876	ENSG00000231728
INSIG2	931.032	0.556693	0.206649	2.6939	0.00706206	0.16797	ENSG00000125629
KCND3	1182.04	0.687734	0.255485	2.69188	0.00710503	0.16877	ENSG00000171385
MAGIX	81.8754	1.00298	0.372703	2.6911	0.00712164	0.168943	ENSG00000269313
VIM	11147.8	-0.637944	0.237109	-2.69051	0.00713426	0.169021	ENSG00000026025
ANO7	39.634	1.29872	0.482891	2.68948	0.0071564	0.169325	ENSG00000146205
ACLY	19960.3	-0.270702	0.100761	-2.68657	0.0072189	0.170581	ENSG00000131473
PABPC5	475.36	0.817324	0.304312	2.68581	0.00723544	0.170749	ENSG00000174740
GADD45G	344.288	-0.52621	0.196118	-2.68312	0.00729382	0.171486	ENSG00000130222
SPATS2L	1140.57	0.459064	0.171089	2.68319	0.00729238	0.171486	ENSG00000196141
STMN3	13591.4	-0.26996	0.100616	-2.68307	0.00729508	0.171486	ENSG00000197457
PKP1	30.844	1.94587	0.726364	2.67892	0.00738603	0.173175	ENSG00000081277
PROX1-AS1	163.126	0.986269	0.368123	2.67918	0.00738017	0.173175	ENSG00000230461
SKOR2	459.99	-2.6263	0.980814	-2.67768	0.00741348	0.173594	ENSG00000215474
EEF1A1	95500	-0.401891	0.150162	-2.67638	0.00744215	0.17378	ENSG00000156508
PPIL6	139.875	0.661563	0.247181	2.67643	0.00744102	0.17378	ENSG00000185250
SRBD1	535.698	-0.434388	0.162326	-2.67602	0.00745017	0.17378	ENSG00000068784
AC124303.1	148.201	0.680006	0.254191	2.67518	0.00746902	0.173866	ENSG00000280234
PLXNB3	78.2007	1.11152	0.415588	2.67456	0.00748265	0.173866	ENSG00000198753
WNT9A	325.253	-0.623972	0.233295	-2.6746	0.00748185	0.173866	ENSG00000143816
MYT1	3198.29	-0.292575	0.109478	-2.67245	0.00752989	0.17474	ENSG00000196132
B4GALT5	6189.16	-0.396911	0.14863	-2.67046	0.00757482	0.175354	ENSG00000158470
TMEM47	1214.44	1.30529	0.488795	2.67042	0.00757572	0.175354	ENSG00000147027
RPLP0	13621.8	-0.39022	0.146211	-2.66889	0.00761025	0.175481	ENSG00000089157
ST8SIA1	2967.72	-0.446494	0.16728	-2.66914	0.00760465	0.175481	ENSG00000111728
TRHDE-AS1	105.083	0.870142	0.32598	2.66931	0.00760081	0.175481	ENSG00000236333
MAST4	761.688	0.589951	0.221097	2.66829	0.00762375	0.175569	ENSG00000069020
CADM2	4288.75	0.369741	0.138734	2.66511	0.00769623	0.177013	ENSG00000175161
RAB27B	948.828	0.485814	0.182539	2.66143	0.00778096	0.178735	ENSG00000041353
ENOX2	466.616	0.700922	0.263477	2.66027	0.00780772	0.179123	ENSG00000165675
SLC35F5	1563.96	0.319605	0.120203	2.65887	0.00784022	0.179641	ENSG00000115084
AC138696.1	50.5603	7.19224	2.70613	2.65776	0.00786616	0.180008	ENSG00000264668
ARHGEF38	11.4527	2.79186	1.05098	2.65642	0.00789753	0.180383	ENSG00000236699
TRIM36	3117.93	-0.457683	0.172307	-2.65621	0.00790246	0.180383	ENSG00000152503
PDLIM1	804.61	-2.23582	0.842124	-2.65497	0.00793153	0.180819	ENSG00000107438
SDK1	3533.46	-0.498021	0.187665	-2.65378	0.00795956	0.18123	ENSG00000146555
MT1F	53.9649	-2.55791	0.964095	-2.65317	0.00797402	0.181331	ENSG00000198417
RAB28	329.76	0.5176	0.195134	2.65254	0.00798877	0.181439	ENSG00000157869
C5orf63	144.995	0.834407	0.314689	2.65153	0.00801285	0.181626	ENSG00000164241
PIGZ	743.875	-0.388229	0.146427	-2.65135	0.00801702	0.181626	ENSG00000119227
POTEI	15.384	2.85326	1.07647	2.65056	0.00803583	0.181825	ENSG00000196834
BCAT1	4644.78	-0.536356	0.202558	-2.64791	0.00809906	0.182697	ENSG00000060982
H2AFY2	3201.11	-0.331908	0.125358	-2.64768	0.00810463	0.182697	ENSG00000099284
WDR19	871.579	0.426692	0.161136	2.64802	0.00809641	0.182697	ENSG00000157796
ANKRD40	1706.89	-0.382755	0.144622	-2.64659	0.00813084	0.182833	ENSG00000154945
IGSF22	106.331	0.851513	0.32171	2.64684	0.00812483	0.182833	ENSG00000179057
ZMAT1	329.833	0.559025	0.211302	2.64562	0.00815406	0.183128	ENSG00000166432
SCN8A	2188.27	0.345993	0.130883	2.64353	0.00820456	0.183811	ENSG00000196876
SH3D21	311.644	-0.642102	0.242896	-2.64353	0.00820476	0.183811	ENSG00000214193
AC010980.1	319.234	-0.808018	0.305789	-2.6424	0.00823199	0.183966	ENSG00000267034
PROX2	118.887	-0.960212	0.363383	-2.64243	0.00823139	0.183966	ENSG00000119608
AC092720.1	15.8875	2.22923	0.844123	2.64088	0.00826903	0.184196	ENSG00000260750
AP001453.3	151.877	1.20756	0.457224	2.64107	0.00826442	0.184196	ENSG00000286264
ERO1B	237.931	0.684646	0.259264	2.64073	0.00827275	0.184196	ENSG00000086619
CCDC74B	148.182	0.804643	0.304976	2.63838	0.00833027	0.185197	ENSG00000152076
SH3BGRL3	3198.22	-0.308867	0.117081	-2.63806	0.00833817	0.185197	ENSG00000142669
FRAS1	1380.39	0.347996	0.132039	2.63555	0.00840014	0.18589	ENSG00000138759
RASD1	286.917	-0.742963	0.281817	-2.63633	0.00838074	0.18589	ENSG00000108551
WAS	39.7179	1.6514	0.62652	2.63583	0.00839328	0.18589	ENSG00000015285
LINC02495	241.478	0.763524	0.289748	2.63513	0.00841057	0.185894	ENSG00000249896
LIMK2	2174.18	-0.352731	0.133913	-2.63404	0.00843762	0.186265	ENSG00000182541
MTHFD2	2684.86	-0.433523	0.164613	-2.63359	0.00844879	0.186285	ENSG00000065911
CALB1	708.077	-0.490931	0.186541	-2.63177	0.00849424	0.186891	ENSG00000104327
PIGF	428.541	0.449887	0.170952	2.63166	0.00849692	0.186891	ENSG00000151665
SERPINB9	2290.51	-0.398221	0.151383	-2.63055	0.00852473	0.187275	ENSG00000170542
EIF4EBP1	398.832	-0.471049	0.179108	-2.62997	0.00853918	0.187366	ENSG00000187840
ADGRL2	4209.69	0.348862	0.132679	2.62937	0.00855445	0.187474	ENSG00000117114
CRAMP1	1799.52	-0.313846	0.119439	-2.62767	0.00859711	0.187784	ENSG00000007545
DZIP1L	63.2744	1.10777	0.421615	2.62746	0.00860256	0.187784	ENSG00000158163
SLC33A1	522.792	0.524851	0.199726	2.62786	0.0085924	0.187784	ENSG00000169359
TNC	64.5659	0.963316	0.366676	2.62716	0.00861005	0.187784	ENSG00000041982
PCK2	156.193	-0.624497	0.237962	-2.62436	0.00868126	0.18911	ENSG00000100889
AGRN	11512.8	-0.457092	0.174251	-2.62318	0.0087113	0.189179	ENSG00000188157
FREM3	114.498	0.800552	0.305204	2.62301	0.00871578	0.189179	ENSG00000183090
ZNF23	467.741	-0.746448	0.28449	-2.62381	0.00869512	0.189179	ENSG00000167377
JPT1	10761.4	-0.284938	0.108704	-2.62123	0.00876127	0.189939	ENSG00000189159
AC074194.1	35.1689	1.32786	0.506804	2.62006	0.00879145	0.190139	ENSG00000248206
MEIS2	288.695	-2.86393	1.09306	-2.62011	0.00879012	0.190139	ENSG00000134138
UBL4A	1476.51	0.434768	0.166074	2.61792	0.0088467	0.191106	ENSG00000102178
JSRP1	81.3488	1.79699	0.686574	2.61733	0.00886216	0.191212	ENSG00000167476
FAM89B	3236.5	-0.363248	0.13886	-2.61593	0.00889853	0.191768	ENSG00000176973
POLE	1107.43	0.337205	0.128962	2.61477	0.00892886	0.192193	ENSG00000177084
SHROOM2	2010.65	0.461351	0.176521	2.61357	0.00896021	0.192639	ENSG00000146950
TPT1	12435.4	0.377206	0.144432	2.61164	0.00901082	0.193498	ENSG00000133112
ADAM12	1291.33	-0.534902	0.204894	-2.61062	0.00903777	0.193607	ENSG00000148848
ANKRD36	658.314	0.421701	0.161599	2.60955	0.00906618	0.193607	ENSG00000135976
EPHA5	2762.6	0.386367	0.148033	2.61001	0.00905391	0.193607	ENSG00000145242
EYS	74.3321	-1.1147	0.427248	-2.60903	0.00908	0.193607	ENSG00000188107
FRMD6	115.064	1.12141	0.429762	2.60938	0.00907056	0.193607	ENSG00000139926
RSPO3	182.871	0.809853	0.310356	2.60943	0.00906932	0.193607	ENSG00000146374
NEUROD2	83.6359	-1.12596	0.431702	-2.60819	0.00910211	0.193623	ENSG00000171532
PRSS3	40.8481	1.79166	0.686925	2.60823	0.00910127	0.193623	ENSG00000010438
FBXO22	1325.34	-0.321825	0.123458	-2.60675	0.00914049	0.194211	ENSG00000167196
FAU	3434.67	-0.295587	0.113465	-2.60508	0.00918517	0.194932	ENSG00000149806
MAPK11	985.227	-0.490045	0.188156	-2.60446	0.00920205	0.195062	ENSG00000185386
CCDC120	1053.51	0.587264	0.225613	2.60297	0.00924188	0.195677	ENSG00000147144
F11R	120.846	-0.845488	0.324919	-2.60215	0.00926406	0.19569	ENSG00000158769
SMTNL2	201.558	-1.01956	0.391802	-2.60222	0.0092622	0.19569	ENSG00000188176
CT75	308.176	-1.00978	0.388688	-2.59793	0.00937883	0.197883	ENSG00000237732
CCT6B	31.5495	1.50431	0.579245	2.59703	0.00940344	0.198172	ENSG00000132141
CDKN1B	1537.2	-0.361886	0.139461	-2.59488	0.00946239	0.199183	ENSG00000111276
MYCN	1046.52	-0.579993	0.223749	-2.59216	0.00953746	0.199604	ENSG00000134323
OCEL1	139.896	-0.672283	0.259336	-2.59232	0.00953307	0.199604	ENSG00000099330
PTPRN	8272.19	0.396115	0.152752	2.59319	0.00950907	0.199604	ENSG00000054356
TTC12	87.7341	0.894774	0.345083	2.59292	0.00951646	0.199604	ENSG00000149292
TUBB	73283.6	-0.250202	0.0965076	-2.59256	0.00952633	0.199604	ENSG00000196230
AC012313.3	157.693	-0.778389	0.300462	-2.59064	0.00957983	0.200259	ENSG00000268230
PCDHB15	1523.27	-0.688219	0.265713	-2.59008	0.00959532	0.200352	ENSG00000113248
MAMLD1	477.069	0.696195	0.268906	2.58899	0.00962569	0.200755	ENSG00000013619
CECR2	771.967	-0.466188	0.180217	-2.58681	0.00968693	0.200765	ENSG00000099954
CYP27C1	378.412	-0.805431	0.31148	-2.58582	0.00971481	0.200765	ENSG00000186684
EGFL7	294.833	0.883493	0.341444	2.58751	0.0096671	0.200765	ENSG00000172889
KLHL5	871.765	0.513545	0.198514	2.58694	0.00968311	0.200765	ENSG00000109790
RIBC1	16.1962	2.04768	0.791345	2.58759	0.00966503	0.200765	ENSG00000158423
RNF128	166.959	1.27535	0.49297	2.58707	0.00967963	0.200765	ENSG00000133135
SNED1	127.575	-0.770453	0.297951	-2.58584	0.0097143	0.200765	ENSG00000162804
TMEM51-AS1	37.7923	1.55981	0.603117	2.58626	0.00970251	0.200765	ENSG00000175147
SERTAD4	588.721	0.482361	0.186613	2.58481	0.00974313	0.201121	ENSG00000082497
SERPINB1	103.438	-0.991761	0.384215	-2.58127	0.00984379	0.202968	ENSG00000021355
DACH2	2741.24	0.381557	0.147913	2.5796	0.00989138	0.203718	ENSG00000126733
CBR4	523.279	0.509826	0.197763	2.57797	0.00993829	0.204451	ENSG00000145439
BCL2L2-PABPN1	23.2734	1.79861	0.698514	2.57491	0.0100267	0.206036	ENSG00000258643
GCNT2	471.973	-0.656618	0.255088	-2.57408	0.0100506	0.206294	ENSG00000111846
ADCY9	2065.73	-0.307294	0.119399	-2.57368	0.0100623	0.206301	ENSG00000162104
NDUFC2-KCTD14	323.301	-0.808411	0.314259	-2.57243	0.0100986	0.20681	ENSG00000259112
EEF1G	13773.2	-0.276616	0.107555	-2.57185	0.0101157	0.206926	ENSG00000254772
GSTP1	2841.33	-0.30873	0.120106	-2.57047	0.010156	0.207152	ENSG00000084207
MTM1	235.493	0.768092	0.298833	2.5703	0.010161	0.207152	ENSG00000171100
NEK4	957.857	0.479599	0.186548	2.57092	0.0101429	0.207152	ENSG00000114904
LINC00963	472.398	0.573364	0.223169	2.56919	0.0101937	0.207584	ENSG00000204054
WASF2	983.749	-0.336392	0.131042	-2.56705	0.0102567	0.208633	ENSG00000158195
FTO	4253.63	-0.488974	0.190563	-2.56594	0.0102895	0.209067	ENSG00000140718
RPS13	3478.7	-0.419854	0.16373	-2.5643	0.0103385	0.209825	ENSG00000110700
CATSPER2	91.2925	1.0331	0.402977	2.56368	0.0103568	0.209962	ENSG00000166762
DMAC2	934.66	-0.411549	0.160566	-2.56312	0.0103736	0.210068	ENSG00000105341
AL121900.2	72.928	-7.33781	2.86775	-2.55873	0.0105055	0.211662	ENSG00000284776
CHTF18	273.87	0.539887	0.211013	2.55855	0.0105109	0.211662	ENSG00000127586
FAR2P2	658.673	-0.527486	0.206126	-2.55904	0.0104961	0.211662	ENSG00000178162
LINC00294	1022.81	-0.332063	0.129805	-2.55817	0.0105224	0.211662	ENSG00000280798
MRPL20-AS1	602.798	-0.816759	0.319042	-2.56004	0.010466	0.211662	ENSG00000224870
MUC20	67.2994	0.945292	0.369386	2.55909	0.0104947	0.211662	ENSG00000176945
CFAP47	27.4103	1.80216	0.704833	2.55687	0.010562	0.212223	ENSG00000165164
RABL2A	558.838	0.429	0.16782	2.55631	0.010579	0.212329	ENSG00000144134
MED12L	432.042	0.496184	0.194147	2.55571	0.0105972	0.212461	ENSG00000144893
SLC13A4	45.4464	-1.06378	0.416316	-2.55522	0.010612	0.212522	ENSG00000164707
OPCML	1195.11	0.567819	0.222262	2.55472	0.0106272	0.21259	ENSG00000183715
PCDHB2	3381.36	-0.435362	0.170464	-2.55397	0.0106502	0.212816	ENSG00000112852
FUT1	220.766	-0.702395	0.275091	-2.55332	0.0106702	0.212982	ENSG00000174951
RASSF10	25.1653	2.10563	0.824902	2.55258	0.0106928	0.213197	ENSG00000189431
ATP2B3	2191.4	0.428373	0.167919	2.55107	0.0107394	0.213882	ENSG00000067842
PTOV1-AS1	40.4459	1.41767	0.555797	2.5507	0.0107508	0.213882	ENSG00000268006
AC022148.1	27.1273	-2.32405	0.911292	-2.55028	0.0107637	0.213905	ENSG00000180458
ACP6	143.224	0.706747	0.277272	2.54893	0.0108055	0.214265	ENSG00000162836
TMSB15B	873.913	0.439195	0.172281	2.5493	0.0107941	0.214265	ENSG00000158427
TMSB15B	873.913	0.439195	0.172281	2.5493	0.0107941	0.214265	ENSG00000269226
AL357093.2	26.6262	1.57805	0.619374	2.54781	0.0108401	0.214716	ENSG00000258752
TRIOBP	3426.58	-0.321557	0.126232	-2.54734	0.0108546	0.21477	ENSG00000100106
PELI2	3442.59	-0.370132	0.145332	-2.5468	0.0108716	0.214872	ENSG00000139946
ADM2	124.556	-0.815005	0.320154	-2.54566	0.010907	0.215231	ENSG00000128165
LPCAT1	6710.94	-0.289603	0.113788	-2.54511	0.0109244	0.215231	ENSG00000153395
OIP5-AS1	3059.38	-0.3636	0.142864	-2.54507	0.0109254	0.215231	ENSG00000247556
IKZF3	13.1319	-3.41281	1.34203	-2.54302	0.0109899	0.216266	ENSG00000161405
ZNF625-ZNF20	29.4174	2.1855	0.859633	2.54237	0.0110104	0.216435	ENSG00000213297
AC138649.1	423.299	-0.412813	0.162465	-2.54094	0.0110556	0.216851	ENSG00000274253
CNNM2	2672.39	-0.299698	0.117962	-2.54063	0.0110654	0.216851	ENSG00000148842
DCC	2698.3	0.597278	0.235105	2.54048	0.0110701	0.216851	ENSG00000187323
TBCC	713.296	-0.364385	0.143449	-2.54018	0.0110794	0.216851	ENSG00000124659
C3orf33	140.349	-0.67253	0.265017	-2.53769	0.0111588	0.218169	ENSG00000174928
CCDC191	139.084	0.717783	0.283318	2.53349	0.0112932	0.220558	ENSG00000163617
AC005225.4	47.3876	-1.22309	0.48313	-2.5316	0.0113543	0.221036	ENSG00000279026
APH1B	550.78	-0.51057	0.201664	-2.53178	0.0113484	0.221036	ENSG00000138613
DCAF12L2	341.842	0.697745	0.275545	2.53224	0.0113338	0.221036	ENSG00000198354
CCM2	1172.85	-0.321895	0.127194	-2.53074	0.0113821	0.221264	ENSG00000136280
CES4A	303.791	0.792666	0.313463	2.52874	0.0114474	0.221264	ENSG00000172824
CHRNB3	281.18	-1.00507	0.397427	-2.52895	0.0114404	0.221264	ENSG00000147432
CYP46A1	1121.92	0.366825	0.144979	2.5302	0.0113996	0.221264	ENSG00000036530
EEF1AKMT4-ECE2	27.7626	-2.59235	1.02496	-2.52922	0.0114318	0.221264	ENSG00000284917
GPR6	45.2606	1.20672	0.477369	2.52786	0.0114759	0.221264	ENSG00000146360
LZTFL1	352.809	0.663372	0.262255	2.5295	0.0114226	0.221264	ENSG00000163818
MANSC1	285.58	-0.755817	0.298935	-2.52837	0.0114593	0.221264	ENSG00000111261
TMOD1	1618.13	-0.488192	0.193122	-2.52789	0.0114751	0.221264	ENSG00000136842
DYRK1B	1266.74	-0.313319	0.123975	-2.52727	0.0114952	0.221402	ENSG00000105204
CD47	6886.72	0.484133	0.191789	2.5243	0.011593	0.222812	ENSG00000196776
SDC2	641.605	0.607961	0.240832	2.52442	0.0115889	0.222812	ENSG00000169439
DCTN1	17519.1	-0.249746	0.0989653	-2.52357	0.0116169	0.22282	ENSG00000204843
KCTD13	1201.97	0.336395	0.133306	2.52348	0.0116199	0.22282	ENSG00000174943
MTHFD2L	498.674	0.488762	0.19371	2.52317	0.0116303	0.22282	ENSG00000163738
ABCD1	623.092	0.473101	0.187636	2.52137	0.0116898	0.223724	ENSG00000101986
GFER	590	-0.456886	0.181243	-2.52085	0.0117073	0.223823	ENSG00000127554
INTS6L	534.207	0.426749	0.169452	2.5184	0.0117889	0.224907	ENSG00000165359
TENM1	3857.43	1.44172	0.572446	2.51852	0.011785	0.224907	ENSG00000009694
SLC10A3	328.733	0.685962	0.272664	2.51577	0.0118772	0.226354	ENSG00000126903
CISD2	2070.6	0.352376	0.140265	2.51222	0.0119973	0.228403	ENSG00000145354
PBX3	1427.06	-0.532473	0.212003	-2.51163	0.0120175	0.228437	ENSG00000167081
SBNO1-AS1	12.8164	1.96962	0.784264	2.51143	0.0120243	0.228437	ENSG00000256092
SMPD4	2636.93	-0.323789	0.128949	-2.51099	0.0120394	0.228484	ENSG00000136699
SEMA4F	2931.95	-0.345401	0.13762	-2.50982	0.0120791	0.228898	ENSG00000135622
ZFHX3	1758.65	-0.643822	0.256543	-2.50961	0.0120865	0.228898	ENSG00000140836
SYT4	21983.4	0.351288	0.140002	2.50917	0.0121014	0.228941	ENSG00000132872
RTL8C	5026.03	-0.323139	0.128811	-2.50863	0.0121201	0.229055	ENSG00000134590
AC024560.5	122.534	4.89697	1.95413	2.50596	0.012212	0.229835	ENSG00000287286
DOCK10	120.112	-1.56794	0.625674	-2.506	0.0122105	0.229835	ENSG00000135905
ESYT1	2400.97	-0.2866	0.114349	-2.50637	0.0121978	0.229835	ENSG00000139641
ZNF674	269.005	0.766306	0.305663	2.50703	0.012175	0.229835	ENSG00000251192
TLE1	4954.37	-0.340044	0.135716	-2.50556	0.0122256	0.229851	ENSG00000196781
AP003068.4	85.9535	-0.74569	0.297692	-2.5049	0.0122485	0.229925	ENSG00000278952
RHOB	8559.72	-0.346539	0.138354	-2.50472	0.0122549	0.229925	ENSG00000143878
CPB1	42.5669	1.5901	0.635283	2.50298	0.0123153	0.230344	ENSG00000153002
CRMP1	44111.8	-0.229101	0.0915255	-2.50313	0.0123099	0.230344	ENSG00000072832
LDLRAD3	2727.06	-0.318845	0.127359	-2.5035	0.012297	0.230344	ENSG00000179241
AC025165.6	125.389	0.897132	0.35856	2.50204	0.0123478	0.230713	ENSG00000287908
MYH7	17.9208	1.98749	0.79469	2.50097	0.0123854	0.231176	ENSG00000092054
RPL7A	9280.17	-0.358511	0.14337	-2.50061	0.0123981	0.231176	ENSG00000148303
BX324167.2	16.1596	1.76699	0.706781	2.50006	0.0124173	0.231297	ENSG00000279954
ZNF616	369.127	-0.583349	0.233603	-2.49718	0.0125186	0.232944	ENSG00000204611
VSTM2L	2997.59	-0.479547	0.192096	-2.49639	0.0125464	0.233222	ENSG00000132821
MGMT	160.837	-0.608402	0.243761	-2.4959	0.0125639	0.233308	ENSG00000170430
ADAM33	16.5904	1.83956	0.737281	2.49506	0.0125934	0.233616	ENSG00000149451
DPP6	2805.45	-0.392426	0.157451	-2.49237	0.0126895	0.235086	ENSG00000130226
LRRC75A	651.108	0.780677	0.313259	2.49211	0.0126986	0.235086	ENSG00000181350
ABCA9	81.6745	0.85584	0.343617	2.49068	0.01275	0.235796	ENSG00000154258
AC074286.1	109.517	0.751109	0.301828	2.48854	0.012827	0.236738	ENSG00000236501
STAG3L5P	367.214	0.50205	0.201728	2.48875	0.0128191	0.236738	ENSG00000242294
TPCN1	173.596	0.792233	0.318453	2.48775	0.0128553	0.236946	ENSG00000186815
UTP14A	429.713	0.567052	0.227961	2.4875	0.0128644	0.236946	ENSG00000156697
FKTN	701.469	0.653516	0.262814	2.48661	0.0128966	0.237297	ENSG00000106692
FTH1	29003.2	-0.28161	0.11329	-2.48574	0.0129282	0.237548	ENSG00000167996
RPL30	3244.38	-0.283471	0.114066	-2.48515	0.0129495	0.237548	ENSG00000156482
RTRAF	1771	-0.380342	0.153044	-2.48519	0.0129484	0.237548	ENSG00000087302
BCORL1	1263.67	0.420872	0.169437	2.48395	0.0129936	0.237874	ENSG00000085185
ISL2	1528.48	-1.17536	0.473154	-2.48409	0.0129883	0.237874	ENSG00000159556
PRKCB	3902.93	0.353039	0.142165	2.4833	0.0130171	0.238065	ENSG00000166501
ZSWIM4	1470.11	-0.365237	0.147146	-2.48215	0.0130594	0.238597	ENSG00000132003
NTRK3	689.984	0.556359	0.224232	2.48117	0.0130951	0.238827	ENSG00000140538
RPL19	5651.4	-0.307272	0.123846	-2.48108	0.0130983	0.238827	ENSG00000108298
GLRA3	650.304	0.631167	0.254581	2.47924	0.0131664	0.239107	ENSG00000145451
GRIP1	1244.09	-0.462706	0.186592	-2.47977	0.0131469	0.239107	ENSG00000155974
RPL22P1	166.838	-0.555607	0.224077	-2.47954	0.0131554	0.239107	ENSG00000213178
SUN2	3705.22	-0.307162	0.123881	-2.47949	0.0131572	0.239107	ENSG00000100242
SRPK3	25.2204	1.54079	0.62197	2.47727	0.013239	0.240185	ENSG00000184343
MAP7D2	2847.78	0.528697	0.213487	2.47649	0.0132682	0.240233	ENSG00000184368
SEC31B	340.071	0.727863	0.29388	2.47673	0.0132592	0.240233	ENSG00000075826
ATP6V0E2	9757.25	-0.302659	0.122288	-2.47498	0.0133245	0.240531	ENSG00000171130
KCNJ12	644.992	-0.749659	0.302853	-2.47532	0.0133116	0.240531	ENSG00000184185
PTTG1	33.5053	1.33226	0.538249	2.47517	0.0133174	0.240531	ENSG00000164611
CDC42BPA	3837.95	0.305975	0.1237	2.47352	0.0133788	0.241027	ENSG00000143776
FADS2	12455.6	-0.270484	0.109367	-2.47317	0.0133919	0.241027	ENSG00000134824
HIST2H3PS2	26.2487	2.3174	0.936929	2.4734	0.0133834	0.241027	ENSG00000273213
CCND2	1476.48	0.365575	0.147929	2.47128	0.0134631	0.241572	ENSG00000118971
PMFBP1	493.136	-0.504983	0.204363	-2.47101	0.0134733	0.241572	ENSG00000118557
SEPTIN9	5825.47	-0.299593	0.121246	-2.47095	0.0134755	0.241572	ENSG00000184640
UBE2K	4637.06	-0.2498	0.101059	-2.47183	0.0134425	0.241572	ENSG00000078140
PSENEN	497.821	-0.397759	0.161024	-2.47018	0.0135044	0.241851	ENSG00000205155
LINC00665	745.417	-0.455328	0.184375	-2.46958	0.0135272	0.241871	ENSG00000232677
RASSF8	616.49	0.419051	0.169694	2.46945	0.0135322	0.241871	ENSG00000123094
BAG1	2050.76	-0.355678	0.144155	-2.46733	0.0136127	0.24307	ENSG00000107262
EGFEM1P	93.052	0.810355	0.328576	2.46626	0.0136531	0.243312	ENSG00000206120
FOXP2	179.072	0.692874	0.280917	2.46647	0.0136451	0.243312	ENSG00000128573
MYL6	7389.13	-0.323213	0.131087	-2.46563	0.0136772	0.243502	ENSG00000092841
AMIGO2	400.259	0.479285	0.194522	2.46391	0.0137429	0.243763	ENSG00000139211
CLOCK	914.865	0.463235	0.188078	2.46299	0.0137784	0.243763	ENSG00000134852
PDE4DIP	11063.7	-0.390084	0.158361	-2.46326	0.013768	0.243763	ENSG00000178104
PRDX2	9780.2	-0.262247	0.106401	-2.4647	0.0137127	0.243763	ENSG00000167815
SKAP2	673.842	-0.331876	0.134718	-2.46349	0.0137591	0.243763	ENSG00000005020
Z73965.1	57.3857	1.06916	0.434126	2.46279	0.013786	0.243763	ENSG00000279894
ZNF560	30.3118	-2.14001	0.868858	-2.46301	0.0137775	0.243763	ENSG00000198028
XKR4	3302.77	0.334009	0.135691	2.46153	0.0138345	0.244382	ENSG00000206579
RHBDL3	560.957	0.557413	0.226596	2.45994	0.0138959	0.245209	ENSG00000141314
SLC10A4	556.327	-0.707015	0.287489	-2.45927	0.0139219	0.245209	ENSG00000145248
WASF3	3251.64	0.333436	0.135564	2.45961	0.0139087	0.245209	ENSG00000132970
LENG8	4345.36	0.593777	0.241605	2.45764	0.0139854	0.246045	ENSG00000167615
SNX21	328.197	0.571103	0.232412	2.45729	0.0139991	0.246045	ENSG00000124104
UQCRB	3605.14	-0.307317	0.125078	-2.45701	0.0140101	0.246045	ENSG00000156467
C12orf43	769.6	-0.365459	0.14884	-2.45539	0.0140732	0.246437	ENSG00000157895
HPCAL4	3196.71	0.552227	0.224877	2.45569	0.0140615	0.246437	ENSG00000116983
NRP1	4825.15	-0.511556	0.208284	-2.45606	0.0140471	0.246437	ENSG00000099250
PTMS	14117.8	-0.311727	0.127026	-2.45404	0.0141263	0.247128	ENSG00000159335
ARHGDIA	6633.16	-0.303638	0.123784	-2.45296	0.0141686	0.247391	ENSG00000141522
BEX1	6588.49	0.436696	0.17801	2.45321	0.0141588	0.247391	ENSG00000133169
NIBAN2	1344.71	-0.308061	0.125621	-2.4523	0.0141946	0.247607	ENSG00000136830
CNDP1	15.2546	1.8248	0.744469	2.45115	0.0142402	0.247741	ENSG00000150656
LHX9	4071.03	0.478146	0.195098	2.4508	0.0142539	0.247741	ENSG00000143355
LZTS1	3659.78	-0.302502	0.123401	-2.45137	0.0142312	0.247741	ENSG00000061337
SCHIP1	850.773	-0.342251	0.139653	-2.45072	0.014257	0.247741	ENSG00000151967
COX7B	1954.68	-0.351241	0.143376	-2.44979	0.014294	0.247908	ENSG00000131174
TRIM67	4792.23	-0.498386	0.203428	-2.44994	0.0142879	0.247908	ENSG00000119283
PCP4	304.122	-0.932196	0.380654	-2.44893	0.014328	0.24826	ENSG00000183036
PATZ1	2777.2	-0.308054	0.125885	-2.44712	0.0144005	0.249278	ENSG00000100105
DPY19L3	1231.86	0.349147	0.142737	2.44608	0.0144417	0.249753	ENSG00000178904
PTBP3	4535.93	-0.308074	0.126001	-2.44501	0.0144848	0.250259	ENSG00000119314
CDR2L	1574.26	-0.330411	0.135232	-2.44329	0.0145541	0.25074	ENSG00000109089
PIRT	312.75	-0.874333	0.357807	-2.44359	0.014542	0.25074	ENSG00000233670
SLITRK5	1305.26	0.323783	0.132515	2.44338	0.0145505	0.25074	ENSG00000165300
C3orf14	1474.68	-0.457617	0.187377	-2.44222	0.0145971	0.251242	ENSG00000114405
TSFM	410.475	0.505672	0.207149	2.4411	0.0146425	0.251784	ENSG00000123297
AL035411.1	18.6696	-1.74343	0.714524	-2.43998	0.0146879	0.252326	ENSG00000185839
AL732372.3	130.85	0.611046	0.250484	2.43946	0.014709	0.252397	ENSG00000250575
SH3RF1	900.744	0.596025	0.244374	2.43899	0.0147284	0.252397	ENSG00000154447
TGM1	68.4512	1.08579	0.445204	2.43886	0.0147339	0.252397	ENSG00000092295
TMEM249	48.1917	1.01448	0.4162	2.43748	0.0147901	0.253122	ENSG00000261587
GPR176	638.823	0.488947	0.200629	2.43708	0.0148066	0.253165	ENSG00000166073
MYD88	426.179	-0.593832	0.243846	-2.43527	0.0148805	0.25384	ENSG00000172936
PPP1R13L	11.1895	2.36464	0.97107	2.43509	0.0148881	0.25384	ENSG00000104881
TNFAIP8	18.3436	-2.41892	0.993311	-2.43521	0.0148832	0.25384	ENSG00000145779
RNF31	219.364	0.628848	0.258287	2.43468	0.0149049	0.253887	ENSG00000092098
SEPTIN6	6276.49	0.506173	0.20796	2.434	0.014933	0.254128	ENSG00000125354
RTN4RL1	1580	-0.447794	0.18402	-2.4334	0.0149577	0.254309	ENSG00000185924
RCOR2	2093.64	-0.52767	0.216916	-2.43259	0.0149911	0.254604	ENSG00000167771
SLC9A9	492.013	-0.637945	0.26228	-2.4323	0.0150031	0.254604	ENSG00000181804
CFAP221	108.811	0.985656	0.405307	2.43188	0.0150208	0.254666	ENSG00000163075
PLXNA2	4356.71	0.625841	0.25742	2.43121	0.0150484	0.254895	ENSG00000076356
ETNK2	2573.8	0.332885	0.137037	2.42917	0.0151335	0.256072	ENSG00000143845
RP2	396.122	0.731081	0.300997	2.42886	0.0151462	0.256072	ENSG00000102218
ADRA1D	124.473	0.887689	0.365599	2.42804	0.0151806	0.256415	ENSG00000171873
IGF1R	3612.04	-0.281011	0.11576	-2.42753	0.015202	0.256537	ENSG00000140443
PKD1	8015.93	0.2838	0.11704	2.42481	0.0153165	0.258229	ENSG00000008710
C1orf216	4126.6	-0.298511	0.12326	-2.4218	0.015444	0.260136	ENSG00000142686
AP001636.3	66.4854	-1.08461	0.448432	-2.41868	0.0155771	0.26057	ENSG00000255240
BCL2	603.719	-0.368766	0.152458	-2.4188	0.015572	0.26057	ENSG00000171791
HRH3	609.525	-0.562501	0.232405	-2.42035	0.0155055	0.26057	ENSG00000101180
KCTD8	393.56	0.52103	0.215295	2.42007	0.0155175	0.26057	ENSG00000183783
KLHL34	91.0181	0.922989	0.381473	2.41954	0.0155403	0.26057	ENSG00000185915
LSP1P4	128.972	0.747932	0.308985	2.42061	0.0154946	0.26057	ENSG00000143429
MARK2	2454.94	-0.303427	0.12545	-2.4187	0.0155759	0.26057	ENSG00000072518
RPL7AP6	231.589	-0.567155	0.234507	-2.4185	0.0155847	0.26057	ENSG00000242071
GALNT18	280.702	0.490175	0.202751	2.41762	0.0156225	0.260961	ENSG00000110328
AC006453.2	147.927	0.785255	0.325	2.41617	0.0156847	0.261758	ENSG00000283196
F2R	4228.47	-0.443807	0.183729	-2.41555	0.0157115	0.26195	ENSG00000181104
UCHL3	261.851	0.468483	0.19397	2.41523	0.0157251	0.26195	ENSG00000118939
LPCAT2	149.726	-0.899153	0.372387	-2.41457	0.0157538	0.262068	ENSG00000087253
WNT10B	121.949	-1.13557	0.47033	-2.4144	0.0157611	0.262068	ENSG00000169884
AC068279.2	63.39	1.0188	0.422253	2.41277	0.0158319	0.262763	ENSG00000287763
PTMA	13659.4	-0.263108	0.10904	-2.41296	0.0158236	0.262763	ENSG00000187514
EDEM1	599.032	0.483168	0.200347	2.41165	0.0158805	0.262848	ENSG00000134109
FKBP1A	4929.04	-0.276034	0.114433	-2.41219	0.0158572	0.262848	ENSG00000088832
NRXN3	1420.56	-0.29891	0.12394	-2.41174	0.0158767	0.262848	ENSG00000021645
ZNF532	4928.52	-0.293879	0.12189	-2.41102	0.0159082	0.263065	ENSG00000074657
GLRA1	31.3185	1.724	0.715288	2.41022	0.0159431	0.263402	ENSG00000145888
AC097382.3	67.1346	-0.918697	0.381291	-2.40943	0.0159772	0.263726	ENSG00000287104
COL25A1	40.0395	1.32001	0.548053	2.40855	0.016016	0.263941	ENSG00000188517
HEBP2	840.364	-0.573352	0.238056	-2.40847	0.0160194	0.263941	ENSG00000051620
CSTF2	383.432	0.531832	0.220996	2.40652	0.0161055	0.265119	ENSG00000101811
SP6	133.251	-0.969858	0.403399	-2.40421	0.0162073	0.266552	ENSG00000189120
LINC00599	975.849	0.530809	0.220821	2.4038	0.0162258	0.266596	ENSG00000253230
SALL2	4083.52	-0.270773	0.112658	-2.40349	0.0162393	0.266596	ENSG00000165821
CYTH2	4706	-0.317785	0.132301	-2.40198	0.0163066	0.267196	ENSG00000105443
EIF3L	5553.93	-0.366863	0.152742	-2.40185	0.0163123	0.267196	ENSG00000100129
SYTL5	139.379	1.00671	0.419168	2.40168	0.0163201	0.267196	ENSG00000147041
ADAMTSL1	87.9415	-1.69746	0.707288	-2.39995	0.0163972	0.268216	ENSG00000178031
ZMAT4	83.4621	0.910501	0.379705	2.39792	0.0164886	0.269467	ENSG00000165061
AC069277.1	15.2953	2.21119	0.922389	2.39724	0.0165191	0.269722	ENSG00000189229
PPFIA4	1105.77	0.634955	0.264927	2.39671	0.0165429	0.269773	ENSG00000143847
PYGB	9368.33	-0.25748	0.107439	-2.39651	0.016552	0.269773	ENSG00000100994
CADPS	8830.03	0.442734	0.18479	2.39587	0.0165808	0.270001	ENSG00000163618
LIMS3	16.2023	2.86757	1.19779	2.39405	0.0166634	0.270616	ENSG00000256977
LIX1	65.4872	-1.72014	0.718362	-2.39453	0.0166415	0.270616	ENSG00000145721
PMEPA1	232.374	0.519122	0.216831	2.39413	0.0166599	0.270616	ENSG00000124225
C8orf82	688.273	-0.402736	0.168291	-2.39309	0.0167071	0.271082	ENSG00000213563
SMARCA4	14404.5	-0.26012	0.108814	-2.39051	0.0168251	0.272692	ENSG00000127616
WDR17	891.215	0.33347	0.139512	2.39026	0.0168363	0.272692	ENSG00000150627
CCDC162P	20.9139	1.4656	0.613346	2.38952	0.0168704	0.272999	ENSG00000203799
MRPL15	948.589	-0.319701	0.133862	-2.38829	0.0169269	0.273499	ENSG00000137547
MXRA7	5737.72	-0.330348	0.138325	-2.38819	0.0169315	0.273499	ENSG00000182534
DPH6	56.2483	0.975805	0.408701	2.38758	0.0169598	0.273583	ENSG00000134146
VEGFB	867.62	-0.496543	0.207983	-2.38743	0.0169669	0.273583	ENSG00000173511
LDHB	10701.4	-0.295956	0.124065	-2.3855	0.017056	0.274191	ENSG00000111716
SHROOM3	202.66	1.01462	0.425218	2.38611	0.0170277	0.274191	ENSG00000138771
TMEM8B	2909.24	0.305818	0.128195	2.38557	0.0170526	0.274191	ENSG00000137103
TRAF3IP2	18.4968	1.56438	0.655843	2.3853	0.0170651	0.274191	ENSG00000056972
GRB2	7833.03	-0.227012	0.0951976	-2.38464	0.0170959	0.274211	ENSG00000177885
PNPLA3	991.12	-0.373236	0.156538	-2.38432	0.0171108	0.274211	ENSG00000100344
RAB2B	1926.02	-0.295101	0.123768	-2.3843	0.0171117	0.274211	ENSG00000129472
JAG1	114.244	0.693413	0.290865	2.38397	0.0171272	0.274217	ENSG00000101384
BAMBI	31.061	1.40211	0.588369	2.38305	0.01717	0.274568	ENSG00000095739
GAD1	26.1459	1.97674	0.829572	2.38285	0.0171794	0.274568	ENSG00000128683
ARAP1	223.334	0.627106	0.263253	2.38214	0.0172123	0.274852	ENSG00000186635
BMP2	153.9	0.72041	0.302522	2.38135	0.0172492	0.275198	ENSG00000125845
AC011603.2	3549.31	-0.389119	0.163532	-2.37947	0.0173375	0.275728	ENSG00000258017
GRN	1037.49	-0.323619	0.135987	-2.37978	0.0173229	0.275728	ENSG00000030582
RPL12	4689.52	-0.331195	0.139196	-2.37935	0.0173433	0.275728	ENSG00000197958
TLX1	315.67	-1.87771	0.789083	-2.37961	0.0173309	0.275728	ENSG00000107807
TNFRSF10B	1406.05	-0.461817	0.194134	-2.37886	0.0173663	0.275851	ENSG00000120889
PROM2	108.237	0.681743	0.286685	2.37802	0.0174059	0.276239	ENSG00000155066
GATB	501.302	-0.453467	0.190771	-2.37703	0.0174527	0.276729	ENSG00000059691
TCEAL3	574.496	0.561097	0.23608	2.37672	0.0174673	0.276729	ENSG00000196507
IMPDH1	2182.6	-0.368282	0.155003	-2.37597	0.0175031	0.277053	ENSG00000106348
CYP2D7	152.674	0.655257	0.275899	2.37499	0.0175496	0.277116	ENSG00000205702
GABRE	50.1258	1.48596	0.625647	2.37507	0.0175454	0.277116	ENSG00000102287
RPS6	3800	-0.3618	0.152342	-2.37492	0.017553	0.277116	ENSG00000137154
TUBA3FP	285.872	0.45627	0.192346	2.37213	0.0176858	0.278971	ENSG00000161149
USP32P3	289.277	0.525739	0.2217	2.3714	0.0177211	0.279041	ENSG00000189423
ZNF37A	872.947	-0.572219	0.241289	-2.37151	0.0177155	0.279041	ENSG00000075407
MRPL35	1656.14	-0.372759	0.157359	-2.36884	0.0178441	0.280734	ENSG00000132313
AC027644.4	121.356	-5.06743	2.14001	-2.36794	0.0178872	0.281169	ENSG00000284461
AC000093.1	2323.33	1.69598	0.716455	2.36718	0.0179243	0.281238	ENSG00000284874
GLB1L3	267.051	-0.935764	0.395289	-2.36729	0.0179189	0.281238	ENSG00000166105
RNF113A	499.695	0.538789	0.227635	2.36689	0.0179382	0.281238	ENSG00000125352
AC020928.1	97.6809	-0.959511	0.405665	-2.36528	0.0180163	0.282219	ENSG00000267260
CASK	12617.8	0.328316	0.139033	2.36143	0.0182046	0.284922	ENSG00000147044
MEGF6	197.86	0.728351	0.308532	2.3607	0.0182403	0.284989	ENSG00000162591
PDE8A	232.849	0.65419	0.277102	2.36083	0.0182343	0.284989	ENSG00000073417
FAT1	2751.25	0.592694	0.251131	2.3601	0.01827	0.285207	ENSG00000083857
JHY	165.323	-0.683205	0.289642	-2.35879	0.0183345	0.285722	ENSG00000109944
TLE3	2278.51	-0.397985	0.168721	-2.35884	0.018332	0.285722	ENSG00000140332
FZD7	982.592	-0.458119	0.194311	-2.35766	0.0183906	0.285859	ENSG00000155760
MED16	1892.69	-0.265909	0.112784	-2.35768	0.0183894	0.285859	ENSG00000175221
ZNF664	5305.07	-0.259496	0.110055	-2.35786	0.0183805	0.285859	ENSG00000179195
LGI2	5243.44	-0.446574	0.189583	-2.35556	0.018495	0.286989	ENSG00000153012
ZNF829	118.666	-0.693949	0.294585	-2.35568	0.0184887	0.286989	ENSG00000185869
LINC00342	1126.55	0.34423	0.146341	2.35224	0.0186605	0.289309	ENSG00000232931
AC023424.3	52.7752	-1.06138	0.451426	-2.35117	0.0187145	0.289349	ENSG00000287555
KIF27	197.057	0.690932	0.293867	2.35118	0.0187142	0.289349	ENSG00000165115
NDUFA1	799.883	0.691488	0.294135	2.35092	0.0187269	0.289349	ENSG00000125356
ZNF544	618.291	-0.376358	0.160047	-2.35155	0.0186954	0.289349	ENSG00000198131
NEO1	6234.82	0.331112	0.140899	2.34999	0.0187738	0.289826	ENSG00000067141
ACTB	106464	-0.23985	0.102081	-2.3496	0.0187935	0.289884	ENSG00000075624
GPR146	11.7201	-2.33181	0.992653	-2.34907	0.0188206	0.290055	ENSG00000164849
SPRY4-AS1	31.6512	1.17373	0.499869	2.34808	0.0188702	0.290573	ENSG00000231185
ESRRB	380.995	0.671558	0.286166	2.34674	0.0189385	0.290882	ENSG00000119715
SUV39H1	245.295	0.647583	0.275922	2.34698	0.0189262	0.290882	ENSG00000101945
TEN1	53.1076	-1.22908	0.523702	-2.34691	0.0189301	0.290882	ENSG00000257949
RABGAP1L-DT	16.9888	1.7462	0.744377	2.34586	0.0189833	0.291324	ENSG00000227373
NPM2	690.818	-0.503794	0.21488	-2.34453	0.019051	0.292115	ENSG00000158806
WDR83OS	582.166	-0.429972	0.183474	-2.3435	0.0191038	0.292678	ENSG00000105583
GXYLT1	328.455	0.419569	0.179157	2.34191	0.0191855	0.293682	ENSG00000151233
HNRNPA1	13046.3	-0.316858	0.135333	-2.34132	0.0192158	0.293896	ENSG00000135486
AC099521.3	43.7237	1.69249	0.723622	2.33891	0.01934	0.294553	ENSG00000287760
PDIA6	2555.05	0.26801	0.114586	2.33895	0.019338	0.294553	ENSG00000143870
RPL21	3043.72	-0.285755	0.122158	-2.33923	0.0193238	0.294553	ENSG00000122026
SSTR1	197.088	0.79492	0.339756	2.33968	0.0193001	0.294553	ENSG00000139874
WIPI1	519.621	-0.508069	0.217206	-2.33911	0.0193299	0.294553	ENSG00000070540
RAB12	1147.65	0.377204	0.161377	2.33741	0.0194176	0.295487	ENSG00000206418
PIR	116.295	0.684705	0.292984	2.337	0.019439	0.295564	ENSG00000087842
SCRT2	1350.04	-0.547505	0.23441	-2.33568	0.0195081	0.296367	ENSG00000215397
ADAP2	45.7973	1.33972	0.573758	2.33498	0.0195442	0.296666	ENSG00000184060
TNR	4147.21	0.62137	0.266353	2.33288	0.0196543	0.298087	ENSG00000116147
FRAT2	331.154	-0.522426	0.224076	-2.33147	0.0197286	0.298466	ENSG00000181274
FRMD4A	5019.47	-0.445398	0.191036	-2.33149	0.0197275	0.298466	ENSG00000151474
LINC00672	369.747	0.64484	0.276566	2.33159	0.0197221	0.298466	ENSG00000263874
AL139396.1	12.7569	1.91504	0.821988	2.32977	0.0198183	0.299572	ENSG00000227329
BTBD3	2441.44	0.36844	0.158242	2.32833	0.0198947	0.300477	ENSG00000132640
AL031658.1	43.1614	-1.06262	0.456704	-2.32671	0.0199808	0.301525	ENSG00000226239
ARHGAP6	24.2379	1.37159	0.589582	2.32638	0.0199983	0.301538	ENSG00000047648
GRM3	466.792	0.674961	0.290182	2.32599	0.020019	0.301599	ENSG00000198822
DDHD1	1765.52	0.310213	0.133497	2.32374	0.0201394	0.303162	ENSG00000100523
AC236972.4	13.1609	2.19844	0.946292	2.32322	0.0201676	0.303334	ENSG00000278803
PTPRZ1	418.745	0.601514	0.259105	2.32151	0.0202595	0.304463	ENSG00000106278
EIF5A2	188.84	0.676554	0.291584	2.32027	0.020326	0.304958	ENSG00000163577
RPP25	206.037	-0.815935	0.351649	-2.32031	0.020324	0.304958	ENSG00000178718
TCIRG1	34.4844	1.17703	0.507471	2.3194	0.0203734	0.305416	ENSG00000110719
CTNNA1	2465.12	-0.460955	0.198936	-2.31709	0.0204986	0.306026	ENSG00000044115
FAM3C	3933.12	0.307018	0.132495	2.3172	0.0204926	0.306026	ENSG00000196937
INA	52254.2	-0.297044	0.128194	-2.31715	0.0204955	0.306026	ENSG00000148798
TMEM9B-AS1	100.833	0.866122	0.373716	2.31759	0.0204714	0.306026	ENSG00000254860
ZNF468	646.163	-0.805991	0.347845	-2.31709	0.0204986	0.306026	ENSG00000204604
CHD4	13762.2	-0.220745	0.0952937	-2.31647	0.0205326	0.30603	ENSG00000111642
KLHL29	1757.59	0.343956	0.148465	2.31675	0.0205173	0.30603	ENSG00000119771
AL589987.1	60.6068	0.849569	0.366869	2.31573	0.0205733	0.306286	ENSG00000230707
PLK2	1462.24	-0.625928	0.270317	-2.31554	0.0205835	0.306286	ENSG00000145632
ETV5	1815.77	-0.458469	0.198087	-2.31449	0.0206411	0.306658	ENSG00000244405
GNG8	26.148	-1.3905	0.600786	-2.31446	0.0206424	0.306658	ENSG00000167414
AHNAK2	2434.59	-0.590228	0.255331	-2.31162	0.0207986	0.307466	ENSG00000185567
ARMCX1	2031.49	-0.265153	0.114683	-2.31204	0.0207754	0.307466	ENSG00000126947
CYP2E1	12.8221	2.25601	0.975347	2.31303	0.0207208	0.307466	ENSG00000130649
TUBB3	67823.4	-0.25849	0.111789	-2.31231	0.0207608	0.307466	ENSG00000258947
U52112.1	11.6938	2.28479	0.988352	2.31172	0.0207931	0.307466	ENSG00000273769
UCP2	104.497	-0.950334	0.410991	-2.3123	0.0207612	0.307466	ENSG00000175567
SLC16A3	70.5653	-0.759965	0.328948	-2.31029	0.0208722	0.308303	ENSG00000141526
DDAH1	6402.58	-0.317596	0.137505	-2.3097	0.0209047	0.30831	ENSG00000153904
PHLDA2	262.584	-0.609685	0.264006	-2.30936	0.0209237	0.30831	ENSG00000181649
RMND1	555.774	-0.474264	0.205352	-2.30952	0.0209149	0.30831	ENSG00000155906
LINC02762	586.88	0.39585	0.171622	2.30653	0.0210812	0.310379	ENSG00000250303
APC	11823.9	-0.318776	0.138239	-2.30597	0.0211121	0.31058	ENSG00000134982
BID	697.357	-0.384326	0.166746	-2.30486	0.0211744	0.310701	ENSG00000015475
GK5	774.64	0.347344	0.150709	2.30474	0.0211814	0.310701	ENSG00000175066
RBM3	2294.07	-0.378237	0.164109	-2.3048	0.0211779	0.310701	ENSG00000102317
SIPA1	138.248	-0.629572	0.273237	-2.30412	0.0212157	0.310701	ENSG00000213445
SORD	761.372	-0.309418	0.134275	-2.30437	0.0212021	0.310701	ENSG00000140263
WNT4	283.748	0.541386	0.234977	2.30399	0.0212231	0.310701	ENSG00000162552
HAPLN4	11.5215	3.18602	1.38379	2.30239	0.0213134	0.311268	ENSG00000187664
HS6ST1P1	162.051	-0.632028	0.274446	-2.30292	0.0212831	0.311268	ENSG00000187952
WDR18	681.086	-0.349837	0.151934	-2.30256	0.0213037	0.311268	ENSG00000065268
IL17RC	76.0873	-0.827997	0.359796	-2.3013	0.0213747	0.311912	ENSG00000163702
CDH8	1324.67	0.375251	0.163317	2.29768	0.0215798	0.314291	ENSG00000150394
EPOR	148.069	-0.572946	0.249324	-2.298	0.0215617	0.314291	ENSG00000187266
SLC1A2	4651.67	0.290789	0.126567	2.29751	0.0215897	0.314291	ENSG00000110436
KAT7	1304.46	-0.339284	0.147771	-2.29601	0.021675	0.31504	ENSG00000136504
NOP53	1454.35	-0.403217	0.175617	-2.296	0.0216759	0.31504	ENSG00000105373
FP565260.2	138.104	8.00149	3.48751	2.29433	0.0217716	0.31504	ENSG00000276612
LENG9	51.5772	-1.21611	0.530007	-2.29452	0.0217604	0.31504	ENSG00000275183
PCYT1B	2308.73	-0.247603	0.10788	-2.29517	0.0217231	0.31504	ENSG00000102230
PSAP	18697.6	-0.212047	0.0924284	-2.29418	0.0217803	0.31504	ENSG00000197746
SLC25A11	1384.34	-0.315417	0.13745	-2.29478	0.0217455	0.31504	ENSG00000108528
UIMC1	443.632	-0.427454	0.186216	-2.29548	0.0217056	0.31504	ENSG00000087206
AC006511.5	24.3465	2.22402	0.969687	2.29355	0.0218165	0.315313	ENSG00000284697
CLHC1	241.353	0.496136	0.216417	2.29251	0.0218765	0.315928	ENSG00000162994
AC244636.3	21.7418	-1.37103	0.598228	-2.29181	0.0219164	0.316	ENSG00000287757
MIA-RAB4B	160.402	-0.947155	0.413249	-2.29197	0.0219072	0.316	ENSG00000268975
AC134043.3	52.6404	-0.8778	0.383615	-2.28823	0.0221239	0.317147	ENSG00000279204
IL4R	60.1056	0.909239	0.397388	2.28804	0.0221354	0.317147	ENSG00000077238
KLF7	7173.37	-0.299433	0.130856	-2.28826	0.0221225	0.317147	ENSG00000118263
RBMS3	2516.64	-0.34827	0.152214	-2.28803	0.0221359	0.317147	ENSG00000144642
RCC2	1986.44	-0.381574	0.166697	-2.28902	0.0220781	0.317147	ENSG00000179051
TRANK1	309.264	0.516142	0.225381	2.29008	0.0220165	0.317147	ENSG00000168016
TTC21B	747.614	0.339351	0.148215	2.28959	0.0220451	0.317147	ENSG00000123607
Z84488.2	20.5499	8.05803	3.52137	2.28833	0.0221186	0.317147	ENSG00000285446
SCN1A-AS1	20.4228	1.53303	0.670205	2.2874	0.0221726	0.317422	ENSG00000236107
PLXDC1	97.5928	0.728895	0.318808	2.28631	0.0222361	0.31808	ENSG00000161381
GABARAPL1	4186.74	-0.258379	0.113055	-2.28542	0.0222884	0.318577	ENSG00000139112
LHX5-AS1	22.2185	1.886	0.825355	2.28508	0.0223083	0.31861	ENSG00000257935
ATP8A2	9922.15	-0.356596	0.156158	-2.28356	0.0223973	0.319153	ENSG00000132932
HNRNPKP4	153.938	0.746613	0.326956	2.28353	0.0223992	0.319153	ENSG00000243547
LINC02397	12.5723	2.16555	0.948292	2.28363	0.0223932	0.319153	ENSG00000205056
LINC01993	61.4722	1.25701	0.550588	2.28303	0.0224284	0.319318	ENSG00000204277
DLST	3063.76	-0.275967	0.120907	-2.28248	0.0224612	0.319374	ENSG00000119689
HTR7P1	77.4104	0.959357	0.42035	2.28228	0.0224728	0.319374	ENSG00000183935
KBTBD3	100.387	0.669425	0.293341	2.28207	0.0224851	0.319374	ENSG00000182359
SLC12A7	731.013	-0.513935	0.225253	-2.28158	0.0225139	0.319532	ENSG00000113504
LINC01014	18.6336	-2.11314	0.926322	-2.28122	0.0225356	0.31959	ENSG00000223941
LINC00327	34.5383	1.16151	0.509413	2.28009	0.0226023	0.320284	ENSG00000232977
SNN	8084.54	-0.257482	0.11297	-2.27921	0.0226548	0.320778	ENSG00000184602
AL109811.3	89.9649	-6.84614	3.005	-2.27825	0.0227114	0.321329	ENSG00000277726
CCDC92	2824.54	-0.259487	0.113951	-2.27718	0.0227755	0.321984	ENSG00000119242
ALDOA	10865.1	-0.295045	0.129659	-2.27554	0.0228738	0.322471	ENSG00000149925
CKB	9637.26	-0.331861	0.145843	-2.27546	0.0228782	0.322471	ENSG00000166165
CPTP	832.933	-0.317369	0.13955	-2.27423	0.0229523	0.322471	ENSG00000224051
DPY19L2	379.485	0.49914	0.219442	2.27459	0.0229307	0.322471	ENSG00000177990
FSCN1	17072.7	-0.267109	0.117425	-2.27472	0.0229227	0.322471	ENSG00000075618
HBQ1	56.5053	-1.0221	0.449403	-2.27435	0.0229452	0.322471	ENSG00000086506
IGSF21	547.743	0.510219	0.224331	2.2744	0.0229419	0.322471	ENSG00000117154
ORC6	164.92	-0.602665	0.264814	-2.2758	0.0228577	0.322471	ENSG00000091651
RPL13	10986.3	-0.323071	0.142106	-2.27345	0.0229989	0.322875	ENSG00000167526
CCDC85A	874.426	-0.477609	0.210117	-2.27306	0.0230225	0.322956	ENSG00000055813
ARAP2	63.6298	1.55057	0.682558	2.27171	0.0231041	0.323211	ENSG00000047365
EPB41L4B	829.399	0.434763	0.191353	2.27204	0.0230839	0.323211	ENSG00000095203
SPRN	408.301	-0.579825	0.255189	-2.27214	0.0230782	0.323211	ENSG00000203772
TMEM163	2663.86	-0.271709	0.119612	-2.27158	0.023112	0.323211	ENSG00000152128
CSRP1	966.204	-0.452115	0.199204	-2.26961	0.0232313	0.32413	ENSG00000159176
ROMO1	579.954	0.466946	0.205725	2.26975	0.0232225	0.32413	ENSG00000125995
VANGL1	645.407	0.453318	0.199726	2.2697	0.0232258	0.32413	ENSG00000173218
FAM43A	148.347	-0.717131	0.316055	-2.26901	0.0232678	0.324139	ENSG00000185112
ZNF283	222.36	-0.769322	0.339026	-2.26921	0.0232553	0.324139	ENSG00000167637
AC106820.4	244.443	-0.507742	0.224062	-2.26608	0.0234467	0.325897	ENSG00000260293
AKAP14	20.7024	2.21513	0.977324	2.26653	0.023419	0.325897	ENSG00000186471
LRRC37A6P	402.744	0.845298	0.373026	2.26606	0.0234479	0.325897	ENSG00000230445
IFI16	60.8047	1.18371	0.52245	2.26568	0.023471	0.325957	ENSG00000163565
TSPAN14	3053.42	-0.362042	0.159835	-2.26511	0.0235062	0.325957	ENSG00000108219
USP54	600.104	0.348267	0.153738	2.26532	0.0234928	0.325957	ENSG00000166348
CLIP3	7704.92	-0.210008	0.0927438	-2.26438	0.0235505	0.326322	ENSG00000105270
CCDC30	424.201	0.362127	0.159979	2.2636	0.0235989	0.326743	ENSG00000186409
B3GNT8	12.7047	-1.78076	0.786936	-2.2629	0.0236419	0.327089	ENSG00000177191
AL671762.1	87.2654	7.89404	3.48997	2.26192	0.0237022	0.327173	ENSG00000285565
PRICKLE1	428.504	-0.373558	0.165132	-2.26218	0.0236862	0.327173	ENSG00000139174
WDR31	129.58	0.625534	0.276527	2.26211	0.0236908	0.327173	ENSG00000148225
ALDOC	397.251	-0.421789	0.18666	-2.25966	0.0238421	0.32783	ENSG00000109107
ARHGAP27	319.804	0.536543	0.237436	2.25973	0.0238378	0.32783	ENSG00000159314
LINC01844	29.9256	1.27282	0.563369	2.25931	0.0238643	0.32783	ENSG00000236714
POMGNT2	1030.32	0.452909	0.200439	2.25959	0.0238469	0.32783	ENSG00000144647
TSPAN6	335.317	0.452295	0.200209	2.25912	0.023876	0.32783	ENSG00000000003
UNC13B	4125.14	-0.315332	0.139582	-2.25911	0.0238764	0.32783	ENSG00000198722
WARS2	204.749	-0.481317	0.212953	-2.2602	0.0238087	0.32783	ENSG00000116874
PDIA3	7142.54	-0.229853	0.101786	-2.25821	0.0239326	0.328002	ENSG00000167004
PRRG1	512.532	0.622447	0.275658	2.25804	0.0239432	0.328002	ENSG00000130962
TMEM184A	62.5077	1.24782	0.552544	2.25832	0.0239259	0.328002	ENSG00000164855
BOLA2B	233.319	-0.446553	0.197804	-2.25755	0.0239735	0.328169	ENSG00000169627
AL365203.2	264.111	-0.512008	0.227049	-2.25506	0.0241297	0.330059	ENSG00000273038
KANK3	153.011	-0.538721	0.238972	-2.25433	0.0241756	0.330437	ENSG00000186994
COX5A	2865.03	-0.342684	0.152077	-2.25335	0.024237	0.330777	ENSG00000178741
YWHAG	43117.1	-0.215453	0.0956051	-2.25357	0.0242232	0.330777	ENSG00000170027
NOL4L	6515.3	-0.337501	0.149803	-2.25296	0.0242616	0.330863	ENSG00000197183
OLFM1	8717.98	-0.233686	0.10375	-2.25239	0.0242978	0.331108	ENSG00000130558
ARHGAP22	1560.51	-0.33886	0.150491	-2.2517	0.024341	0.331447	ENSG00000128805
APC2	27142.7	-0.296482	0.131712	-2.25098	0.0243869	0.331822	ENSG00000115266
TACC1	1452.59	0.367883	0.163475	2.2504	0.0244236	0.332074	ENSG00000147526
ANP32A	1778.04	-0.310485	0.1381	-2.24826	0.0245595	0.333325	ENSG00000140350
FAM184B	122.724	1.0354	0.460555	2.24816	0.0245657	0.333325	ENSG00000047662
SPECC1L	3973.94	-0.341258	0.151799	-2.24808	0.0245709	0.333325	ENSG00000100014
ASIC4	2156.18	0.5215	0.232136	2.24653	0.0246703	0.333675	ENSG00000072182
HAUS7	277.682	0.576805	0.256751	2.24656	0.0246685	0.333675	ENSG00000213397
MICU1	1188.22	-0.288864	0.128535	-2.24736	0.0246173	0.333675	ENSG00000107745
OPRM1	410.067	0.859521	0.3826	2.24653	0.0246703	0.333675	ENSG00000112038
UBTD2	2503.69	-0.311352	0.138633	-2.24586	0.0247127	0.333999	ENSG00000168246
KCNC3	1550.31	0.378767	0.168806	2.2438	0.024845	0.335368	ENSG00000131398
ZSCAN31	83.888	-0.825149	0.367761	-2.24371	0.024851	0.335368	ENSG00000235109
ZNF862	663.938	0.389414	0.173587	2.24333	0.0248757	0.335452	ENSG00000106479
NKAIN3-IT1	1743.87	-0.382975	0.170761	-2.24275	0.0249127	0.335701	ENSG00000274956
IRAK3	87.6964	-0.738927	0.329562	-2.24215	0.0249516	0.335975	ENSG00000090376
AC026464.3	39.8093	-1.20158	0.536078	-2.24144	0.0249979	0.336004	ENSG00000260371
LANCL2	2710.83	-0.247552	0.110468	-2.24094	0.02503	0.336004	ENSG00000132434
PUS7L	938.576	0.333442	0.148813	2.24069	0.0250464	0.336004	ENSG00000129317
ZBTB37	1062.64	0.405849	0.181059	2.24153	0.0249916	0.336004	ENSG00000185278
ZSWIM5	3359.64	-0.250256	0.111685	-2.24074	0.0250431	0.336004	ENSG00000162415
LRRC7	943.346	0.452376	0.201926	2.2403	0.0250712	0.336088	ENSG00000033122
OSGIN1	59.0832	0.820235	0.366383	2.23874	0.0251731	0.337205	ENSG00000140961
TLE2	115.389	0.964808	0.431088	2.23807	0.0252162	0.337532	ENSG00000065717
AC244033.2	73.4183	0.813228	0.363424	2.23768	0.0252417	0.337624	ENSG00000285184
ZNF229	485.435	-0.692705	0.309728	-2.23649	0.0253195	0.338415	ENSG00000278318
BASP1	27526.6	-0.202563	0.0906345	-2.23494	0.025421	0.338916	ENSG00000176788
NAF1	184.405	0.543874	0.243368	2.23478	0.0254318	0.338916	ENSG00000145414
NFE2L2	628.55	0.353399	0.158118	2.23503	0.0254156	0.338916	ENSG00000116044
ZNF569	459.677	-0.397101	0.177666	-2.2351	0.025411	0.338916	ENSG00000196437
CHCHD2	2926.69	0.556494	0.249049	2.23447	0.0254519	0.338934	ENSG00000106153
FGF18	515.689	-0.344983	0.154443	-2.23372	0.0255017	0.339348	ENSG00000156427
CPNE9	240.545	-0.819193	0.366929	-2.23257	0.0255776	0.340108	ENSG00000144550
FGD6	338.584	-0.575327	0.25773	-2.23228	0.0255963	0.340108	ENSG00000180263
ABCA5	1271.76	0.446172	0.1999	2.23198	0.0256166	0.340128	ENSG00000154265
IGFBP5	295.403	-2.04921	0.918337	-2.23144	0.025652	0.34035	ENSG00000115461
PARVB	906.393	-0.410433	0.183962	-2.23108	0.0256758	0.340416	ENSG00000188677
GPRC5D-AS1	18.7138	2.09992	0.941475	2.23045	0.0257173	0.340717	ENSG00000247498
TM9SF4	2563.24	-0.36014	0.16149	-2.2301	0.0257407	0.340777	ENSG00000101337
SPATA18	35.1051	-1.09343	0.490391	-2.22971	0.0257664	0.340869	ENSG00000163071
SIX2	17.3417	-1.93026	0.865924	-2.22914	0.0258048	0.341128	ENSG00000170577
FCRLA	24.2434	1.82702	0.81987	2.22843	0.0258518	0.341252	ENSG00000132185
ZNF516	814.32	-0.411977	0.184856	-2.22864	0.0258377	0.341252	ENSG00000101493
AKAIN1	72.3621	-1.0967	0.492209	-2.22811	0.0258729	0.341281	ENSG00000231824
GPI	10900.5	-0.21402	0.0960984	-2.2271	0.0259409	0.341929	ENSG00000105220
ROBO1	7850.65	0.2718	0.12207	2.2266	0.0259741	0.342119	ENSG00000169855
TNFRSF19	198.358	0.494763	0.222283	2.22583	0.0260255	0.342547	ENSG00000127863
PCDHB18P	194.215	-2.86141	1.28613	-2.22482	0.0260936	0.342803	ENSG00000146001
TMEM131L	852.408	-0.536547	0.241178	-2.22469	0.0261018	0.342803	ENSG00000121210
TMSB4XP8	1882.45	1.00537	0.45189	2.22481	0.0260941	0.342803	ENSG00000187653
PLCB2	172.908	0.706137	0.317489	2.22413	0.0261398	0.342809	ENSG00000137841
SOX13	557.52	0.511163	0.229827	2.22412	0.0261401	0.342809	ENSG00000143842
ELOVL2	468.747	0.49948	0.224706	2.22281	0.0262285	0.343721	ENSG00000197977
CMTM3	322.863	-0.440602	0.198245	-2.22252	0.0262485	0.343734	ENSG00000140931
WEE1	260.185	0.632089	0.284491	2.22183	0.026295	0.344094	ENSG00000166483
B4GALNT3	152.219	0.593581	0.267301	2.22064	0.0263751	0.344646	ENSG00000139044
RHOBTB3	1511.97	-0.493546	0.222254	-2.22064	0.0263752	0.344646	ENSG00000164292
GCNT1	45.5441	1.2089	0.544958	2.21835	0.0265312	0.346435	ENSG00000187210
PVT1	134.17	-0.937298	0.422616	-2.21785	0.0265652	0.34663	ENSG00000249859
CENPV	1896.71	-0.274912	0.123976	-2.21746	0.0265918	0.346727	ENSG00000166582
AGBL3	70.9969	0.838761	0.378855	2.21394	0.026833	0.34787	ENSG00000146856
AL121845.3	337.301	0.566846	0.255903	2.21508	0.0267546	0.34787	ENSG00000273154
CCDC71L	863.604	0.330882	0.149384	2.21498	0.0267617	0.34787	ENSG00000253276
DCLK3	81.7619	1.02196	0.461345	2.21519	0.0267473	0.34787	ENSG00000163673
KRIT1	378.819	0.402994	0.182009	2.21414	0.026819	0.34787	ENSG00000001631
PTN	2177.45	-1.22688	0.554147	-2.214	0.026829	0.34787	ENSG00000105894
TMEM134	327.747	0.411741	0.185949	2.21427	0.0268104	0.34787	ENSG00000172663
WSCD1	1587.78	0.564024	0.254553	2.21574	0.0267092	0.34787	ENSG00000179314
RAB3D	2274.88	-0.264351	0.119445	-2.21316	0.0268864	0.348313	ENSG00000105514
RTL8A	1632.11	-0.262084	0.118436	-2.21288	0.026906	0.348318	ENSG00000203950
NDUFS1	4928.84	-0.254357	0.115005	-2.21171	0.0269864	0.349109	ENSG00000023228
BMP3	67.4886	1.19208	0.539201	2.21082	0.0270482	0.349659	ENSG00000152785
SNHG14	18228.6	0.286501	0.129612	2.21046	0.0270735	0.349736	ENSG00000224078
HES4	1004.44	-0.394803	0.178758	-2.20859	0.0272028	0.350995	ENSG00000188290
MFHAS1	2025.78	-0.246773	0.111752	-2.20822	0.027229	0.350995	ENSG00000147324
RNF175	220.547	-0.543343	0.246053	-2.20824	0.0272277	0.350995	ENSG00000145428
AL691442.1	19.2499	7.70831	3.49187	2.2075	0.0272789	0.351138	ENSG00000251246
INKA2	697.239	-0.390602	0.176937	-2.20757	0.027274	0.351138	ENSG00000197852
TMEM98	402.513	-0.479097	0.217061	-2.2072	0.0273002	0.351163	ENSG00000006042
DPYSL4	5532.61	-0.283274	0.128387	-2.2064	0.0273558	0.351469	ENSG00000151640
GPC5	51.3693	0.950282	0.430712	2.2063	0.0273627	0.351469	ENSG00000179399
CLU	1221.15	0.510911	0.231665	2.20539	0.0274266	0.351791	ENSG00000120885
SCLT1	299.503	0.53949	0.244597	2.20563	0.0274099	0.351791	ENSG00000151466
GSTO2	77.3011	-0.979878	0.444441	-2.20474	0.0274721	0.352125	ENSG00000065621
PPT1	1819.2	-0.248511	0.112747	-2.20415	0.027514	0.352412	ENSG00000131238
UBAP1L	412.481	0.401084	0.182029	2.20341	0.0275658	0.352826	ENSG00000246922
SCNN1D	194.131	0.500857	0.227388	2.20266	0.0276187	0.353254	ENSG00000162572
AL121906.2	23.2169	1.325	0.601688	2.20214	0.0276553	0.353323	ENSG00000275223
PASK	727.742	0.351638	0.159688	2.20203	0.027663	0.353323	ENSG00000115687
AL021546.1	20.7148	2.58244	1.17451	2.19874	0.0278967	0.353436	ENSG00000111780
ANXA2	4993.21	-0.99427	0.452148	-2.19899	0.0278783	0.353436	ENSG00000182718
CNKSR2	1098.48	0.495451	0.225401	2.19809	0.0279429	0.353436	ENSG00000149970
DKK2	54.7379	1.3704	0.622944	2.19988	0.0278152	0.353436	ENSG00000155011
EIF4HP1	77.4804	-0.712552	0.324132	-2.19834	0.0279248	0.353436	ENSG00000233830
KCNJ18	12.4527	-1.88009	0.854574	-2.20003	0.0278047	0.353436	ENSG00000260458
LANCL3	398.478	0.534546	0.242886	2.20081	0.0277494	0.353436	ENSG00000147036
MAD2L2	1001.39	-0.334768	0.152153	-2.20021	0.0277917	0.353436	ENSG00000116670
2022-03-01	814.464	0.430817	0.195999	2.19806	0.0279449	0.353436	ENSG00000145416
NUDCD2	634.75	-0.487624	0.22187	-2.19778	0.0279644	0.353436	ENSG00000170584
PNMA5	69.7374	1.25262	0.569915	2.19791	0.0279559	0.353436	ENSG00000198883
RPL41P1	94.1177	-0.73995	0.336103	-2.20156	0.0276964	0.353436	ENSG00000227063
TIMP3	19.5518	1.48318	0.674232	2.19981	0.0278205	0.353436	ENSG00000100234
TMEM121	343.564	0.824526	0.374979	2.19886	0.0278881	0.353436	ENSG00000184986
TTC21A	148.608	0.6185	0.281341	2.1984	0.0279204	0.353436	ENSG00000168026
RPP14	1036.93	-0.341109	0.15526	-2.19702	0.0280192	0.353774	ENSG00000163684
TGFB2	47.9505	1.29573	0.589811	2.19686	0.0280302	0.353774	ENSG00000092969
EIF3H	2363.21	-0.397196	0.180875	-2.19597	0.0280939	0.354085	ENSG00000147677
SLC22A7	17.5561	1.44878	0.659728	2.19602	0.0280904	0.354085	ENSG00000137204
PCDH15	63.4369	0.917127	0.417732	2.19549	0.0281282	0.354271	ENSG00000150275
ST6GAL1	3315.13	-0.40032	0.182392	-2.19483	0.0281755	0.35462	ENSG00000073849
RPL4P4	179.934	-0.525129	0.239331	-2.19415	0.0282246	0.354992	ENSG00000229638
HTR1E	30.5212	-1.65001	0.752755	-2.19196	0.0283823	0.356727	ENSG00000168830
SEMA4G	2004.5	-0.276028	0.125978	-2.19108	0.0284463	0.357284	ENSG00000095539
DCTN1-AS1	75.5448	-0.749354	0.342049	-2.19078	0.0284677	0.357305	ENSG00000237737
HSD17B10	935.071	0.389708	0.177931	2.19021	0.0285088	0.357573	ENSG00000072506
AC254562.1	20.1553	1.41573	0.646522	2.18976	0.0285414	0.357734	ENSG00000227370
KIF1B	26568.3	-0.27378	0.125048	-2.1894	0.0285677	0.357816	ENSG00000054523
PDE4C	190.354	-1.02881	0.469972	-2.18908	0.0285908	0.357859	ENSG00000105650
AC144831.1	222.692	-0.65412	0.298876	-2.1886	0.0286261	0.358053	ENSG00000261888
TUBGCP6	1945.47	0.323982	0.148216	2.18587	0.0288249	0.360292	ENSG00000128159
TDRG1	92.4606	-1.09515	0.501105	-2.18547	0.0288542	0.360409	ENSG00000204091
DYNC2H1	953.034	0.387975	0.17758	2.18479	0.0289045	0.360789	ENSG00000187240
SOX18	31.1919	-1.35345	0.619766	-2.18381	0.0289762	0.361186	ENSG00000203883
TMEM187	226.528	0.738535	0.338147	2.18407	0.0289574	0.361186	ENSG00000177854
RNF165	2403.65	0.287936	0.131923	2.18261	0.0290648	0.362041	ENSG00000141622
AC112484.5	29.4936	1.35805	0.622346	2.18214	0.0290991	0.362078	ENSG00000287110
COX6A1	4668.73	-0.244673	0.112131	-2.18203	0.0291077	0.362078	ENSG00000111775
AC010733.2	31.6628	-1.52414	0.698953	-2.18061	0.0292125	0.362474	ENSG00000267520
C1orf115	42.28	-0.920212	0.421919	-2.18102	0.0291823	0.362474	ENSG00000162817
PLPPR4	888.064	0.588661	0.269987	2.18033	0.0292328	0.362474	ENSG00000117600
SYNM	1215.12	0.350371	0.160723	2.17997	0.0292595	0.362474	ENSG00000182253
TRPM4	610.445	-0.466185	0.213809	-2.18038	0.0292293	0.362474	ENSG00000130529
XYLT1	648.525	0.36558	0.167696	2.18001	0.0292565	0.362474	ENSG00000103489
LINC01630	165.282	-2.42115	1.11077	-2.17969	0.0292801	0.362482	ENSG00000227115
SCML2	765.206	0.435811	0.200024	2.1788	0.0293469	0.36306	ENSG00000102098
AC011511.1	228.679	0.5715	0.262407	2.17791	0.0294125	0.363297	ENSG00000167807
AL590560.2	23.1611	1.6317	0.749245	2.1778	0.029421	0.363297	ENSG00000256029
NEK8	102.514	-0.74409	0.341719	-2.17749	0.0294438	0.363297	ENSG00000160602
TEAD1	550.243	0.698422	0.320751	2.17746	0.0294462	0.363297	ENSG00000187079
FZD1	1032.72	0.457669	0.210283	2.17645	0.029522	0.363736	ENSG00000157240
HSPBAP1	113.975	-0.570499	0.262115	-2.17652	0.0295165	0.363736	ENSG00000169087
LRRTM1	884.543	0.47224	0.217005	2.17617	0.0295423	0.363739	ENSG00000162951
SYN3	1225.08	0.586886	0.269741	2.17574	0.0295748	0.363808	ENSG00000185666
UBXN11	239.785	0.470904	0.216452	2.17556	0.029588	0.363808	ENSG00000158062
HYDIN2	128.021	-0.862631	0.396725	-2.17438	0.0296765	0.364649	ENSG00000276975
AC245060.5	62.7169	0.969658	0.446067	2.1738	0.0297204	0.36494	ENSG00000274422
DZIP1	1986.82	0.325811	0.149903	2.17348	0.029744	0.364983	ENSG00000134874
VWA5A	866.98	0.450169	0.207197	2.17266	0.029806	0.365497	ENSG00000110002
MAP10	222.747	0.440219	0.202669	2.1721	0.0298478	0.365762	ENSG00000212916
FLOT2	4099.4	-0.235496	0.108449	-2.1715	0.0298935	0.366075	ENSG00000132589
YBX2	151.538	-0.588403	0.271172	-2.16985	0.0300179	0.367349	ENSG00000006047
PIAS2	910.599	0.329918	0.152149	2.16839	0.030129	0.36846	ENSG00000078043
BCL6	74.47	0.999087	0.460928	2.16755	0.0301927	0.368741	ENSG00000113916
INSYN1	1947.56	0.263225	0.121429	2.16772	0.03018	0.368741	ENSG00000205363
YTHDF2	2620.21	-0.257331	0.118743	-2.16713	0.0302249	0.368886	ENSG00000198492
AL591806.4	74.8924	0.958551	0.442438	2.16652	0.0302713	0.369204	ENSG00000270149
ZNF610	252.194	-0.529362	0.244394	-2.16602	0.0303094	0.36942	ENSG00000167554
AC000120.3	21.9953	-7.65465	3.5356	-2.16502	0.0303861	0.370106	ENSG00000285953
SIK2	2114.04	0.314213	0.145168	2.16448	0.0304273	0.370359	ENSG00000170145
AC021092.1	489.551	-0.679434	0.31399	-2.16387	0.030474	0.370678	ENSG00000186019
ACAT2	6422.08	-0.338403	0.156413	-2.16352	0.0305011	0.370759	ENSG00000120437
TSNAXIP1	116.233	0.569659	0.263447	2.16233	0.0305931	0.371628	ENSG00000102904
KCNN2	37.6319	-1.07113	0.495577	-2.16138	0.0306661	0.371767	ENSG00000080709
NPHP3-ACAD11	214.458	-0.732757	0.339003	-2.16151	0.0306562	0.371767	ENSG00000274810
PRTFDC1	178.295	-0.569115	0.263297	-2.16149	0.0306573	0.371767	ENSG00000099256
ACSF3	479.394	0.381478	0.176596	2.16017	0.0307592	0.371781	ENSG00000176715
AL035696.4	18.785	1.45493	0.673637	2.15982	0.0307868	0.371781	ENSG00000285578
ASAP2	1500.31	0.324202	0.150059	2.1605	0.0307339	0.371781	ENSG00000151693
ATP2B2	2295.8	0.508725	0.235465	2.16052	0.0307328	0.371781	ENSG00000157087
MCTS1	2275.07	0.300038	0.138921	2.15977	0.0307903	0.371781	ENSG00000232119
SAMD5	658.712	0.481884	0.223105	2.1599	0.0307804	0.371781	ENSG00000203727
PURPL	43.5766	-1.76419	0.816999	-2.15935	0.0308228	0.371926	ENSG00000250337
AC007731.1	27.7697	1.2627	0.585218	2.15766	0.0309546	0.372277	ENSG00000215493
AFMID	164.489	-0.538143	0.249343	-2.15824	0.030909	0.372277	ENSG00000183077
MAP3K9	3864.56	0.250479	0.116083	2.15776	0.0309468	0.372277	ENSG00000006432
NCKAP5	212.686	0.539991	0.250223	2.15803	0.0309251	0.372277	ENSG00000176771
ZWILCH	1074.05	-0.338158	0.156657	-2.15859	0.0308818	0.372277	ENSG00000174442
AC005041.1	163.563	-0.493963	0.228992	-2.15712	0.0309961	0.372329	ENSG00000159239
PCSK1N	19827.3	0.494098	0.229059	2.15707	0.031	0.372329	ENSG00000102109
ARHGAP32	1992.39	0.321612	0.14931	2.15399	0.0312409	0.374707	ENSG00000134909
LINC00630	172.784	0.633963	0.294354	2.15375	0.0312601	0.374707	ENSG00000223546
TLL1	147.26	-1.13436	0.526613	-2.15407	0.0312349	0.374707	ENSG00000038295
IRF9	39.8173	1.13785	0.528383	2.15347	0.031282	0.374723	ENSG00000213928
AL513128.2	35.3247	-1.1779	0.547084	-2.15305	0.0313147	0.374866	ENSG00000285254
NAPA	2996.8	-0.228224	0.10606	-2.15185	0.0314093	0.375009	ENSG00000105402
TNIP1	539.656	-0.317302	0.147453	-2.15188	0.031407	0.375009	ENSG00000145901
WDR60	512.873	0.316568	0.147076	2.15241	0.0313651	0.375009	ENSG00000126870
ZNF568	406.486	-0.344478	0.160077	-2.15195	0.0314016	0.375009	ENSG00000198453
NIPSNAP1	5543.57	-0.225413	0.104769	-2.15152	0.031435	0.375068	ENSG00000184117
RNF44	5017.08	-0.307097	0.142803	-2.15049	0.0315165	0.375793	ENSG00000146083
AC006254.1	167.548	0.642603	0.298924	2.14972	0.0315772	0.376021	ENSG00000243696
TMEM263	509.926	0.450766	0.209682	2.14976	0.031574	0.376021	ENSG00000151135
ADAMTS7	767.62	-0.651743	0.303317	-2.14872	0.0316564	0.376652	ENSG00000136378
LIMD2	1251.93	-0.493179	0.229542	-2.14853	0.0316717	0.376652	ENSG00000136490
CACNB3	5294.07	-0.234371	0.1091	-2.14822	0.0316962	0.376696	ENSG00000167535
ATP2A3	73.763	-0.901612	0.419804	-2.1477	0.0317376	0.376942	ENSG00000074370
AL138756.1	473.476	-0.393126	0.183225	-2.14559	0.0319054	0.377204	ENSG00000259953
ASAP1	3662.18	-0.290625	0.135433	-2.1459	0.0318809	0.377204	ENSG00000153317
BAIAP2L2	120.12	0.570364	0.265713	2.14654	0.0318298	0.377204	ENSG00000128298
BCRP2	20.6975	1.26963	0.591579	2.14617	0.0318593	0.377204	ENSG00000169668
DRGX	2926.56	-1.03008	0.480078	-2.14565	0.0319009	0.377204	ENSG00000165606
SLC7A1	6171.31	-0.287564	0.134008	-2.14587	0.0318835	0.377204	ENSG00000139514
SNORC	101.218	0.761667	0.354958	2.1458	0.0318892	0.377204	ENSG00000182600
MXD4	2743.05	-0.243529	0.113558	-2.14453	0.0319903	0.377962	ENSG00000123933
CR769775.2	71.7648	-1.12375	0.524166	-2.14388	0.0320424	0.378329	ENSG00000284471
LRRC8C	310.401	0.563413	0.262868	2.14333	0.0320865	0.378358	ENSG00000171488
TXNRD3	103.403	0.688881	0.321398	2.14339	0.0320818	0.378358	ENSG00000197763
ELOVL7	80.6107	0.922844	0.430911	2.14161	0.0322246	0.379012	ENSG00000164181
ISYNA1	2493.29	-0.362338	0.169147	-2.14214	0.0321819	0.379012	ENSG00000105655
PRC1	188.539	-0.736082	0.343655	-2.14193	0.0321995	0.379012	ENSG00000198901
PTK7	1571.51	-0.442641	0.206687	-2.1416	0.0322256	0.379012	ENSG00000112655
MTRR	420.381	0.401586	0.187565	2.14104	0.0322704	0.379047	ENSG00000124275
UBASH3B	2511.95	-0.357475	0.166959	-2.1411	0.0322663	0.379047	ENSG00000154127
BMPER	1489.27	-1.93262	0.902812	-2.14066	0.0323011	0.379126	ENSG00000164619
PCSK1	7033.55	0.535476	0.250171	2.14044	0.032319	0.379126	ENSG00000175426
KPNA2	3991.08	-0.236386	0.110554	-2.1382	0.0325005	0.380875	ENSG00000182481
SELENOTP1	12.0384	1.69481	0.792677	2.13808	0.0325102	0.380875	ENSG00000233846
ZNF354A	409.996	0.359443	0.168278	2.13601	0.0326786	0.382602	ENSG00000169131
RYR3	577.739	0.372053	0.174223	2.1355	0.0327204	0.382844	ENSG00000198838
NEK9	1210.37	0.263288	0.123372	2.1341	0.0328344	0.38393	ENSG00000119638
ARRDC1-AS1	416.679	0.417434	0.195703	2.133	0.0329247	0.384738	ENSG00000203993
ENKUR	28.6388	1.17056	0.548936	2.13241	0.0329731	0.384806	ENSG00000151023
LONRF2	8887.94	0.297883	0.139688	2.13249	0.0329662	0.384806	ENSG00000170500
ANO5	2318.04	-0.481191	0.225761	-2.13142	0.0330548	0.385511	ENSG00000171714
AC010931.2	528.397	-0.683322	0.320746	-2.13041	0.0331374	0.385978	ENSG00000248540
ZNF467	467.73	-0.40613	0.190621	-2.13056	0.0331253	0.385978	ENSG00000181444
TTC3P1	971.786	0.324279	0.152245	2.12997	0.033174	0.386156	ENSG00000215105
RPL31	5634.12	-0.250056	0.117434	-2.12934	0.033226	0.386513	ENSG00000071082
AC020663.4	69.092	0.794463	0.374081	2.12377	0.0336891	0.388664	ENSG00000285952
ACADSB	895.719	0.366351	0.172387	2.12516	0.0335733	0.388664	ENSG00000196177
BOK	423.657	-0.743641	0.349893	-2.12534	0.0335587	0.388664	ENSG00000176720
CEACAM19	204.921	0.525383	0.247336	2.12417	0.0336562	0.388664	ENSG00000186567
CPEB2	2170.61	0.293661	0.138238	2.12432	0.0336433	0.388664	ENSG00000137449
EMG1	308.133	0.458756	0.215809	2.12575	0.0335242	0.388664	ENSG00000126749
FDXACB1	112.092	-0.559186	0.263198	-2.12458	0.0336214	0.388664	ENSG00000255561
HSPA1L	237.722	0.608849	0.28643	2.12565	0.0335326	0.388664	ENSG00000204390
JPX	1370.75	-0.254208	0.119697	-2.12377	0.0336896	0.388664	ENSG00000225470
LRRC8D	1703.1	-0.240884	0.113362	-2.1249	0.0335947	0.388664	ENSG00000171492
SASH1	796.142	0.526018	0.247466	2.12562	0.0335349	0.388664	ENSG00000111961
SLC6A17	2113.42	0.354627	0.166764	2.12652	0.0334597	0.388664	ENSG00000197106
WNT5A	85.8277	-1.07276	0.504978	-2.12436	0.0336397	0.388664	ENSG00000114251
HAS3	675.85	-0.418106	0.196963	-2.12277	0.0337733	0.389362	ENSG00000103044
PM20D2	563.583	0.316115	0.148933	2.12253	0.0337931	0.389362	ENSG00000146281
CTHRC1	78.8219	-0.966548	0.455598	-2.12149	0.0338804	0.39012	ENSG00000164932
ZNF81	751.562	0.524936	0.247512	2.12085	0.0339344	0.390493	ENSG00000197779
AC093627.4	17.1755	-2.04158	0.963036	-2.11994	0.0340113	0.390675	ENSG00000240859
AL669831.1	293.488	0.406329	0.191697	2.11964	0.0340364	0.390675	ENSG00000228327
SAT1	922.02	-0.432588	0.204025	-2.12027	0.0339831	0.390675	ENSG00000130066
TXNL4A	3035.38	-0.265206	0.125107	-2.11984	0.0340195	0.390675	ENSG00000141759
SELENOW	3488.76	-0.246803	0.116516	-2.1182	0.0341585	0.390928	ENSG00000178980
STXBP5-AS1	206.443	0.708984	0.334726	2.1181	0.0341663	0.390928	ENSG00000233452
SYNPO	328.714	-0.481686	0.227379	-2.11843	0.034139	0.390928	ENSG00000171992
TPD52L1	43.8553	0.929757	0.438905	2.11836	0.0341448	0.390928	ENSG00000111907
TTC19	2375.18	-0.259185	0.122324	-2.11883	0.0341048	0.390928	ENSG00000011295
AD000671.2	24.7254	-1.49849	0.707648	-2.11756	0.0342123	0.391207	ENSG00000267120
BLOC1S2	1824.58	-0.231881	0.109544	-2.11678	0.0342783	0.391536	ENSG00000196072
RPL6	9724.33	-0.27982	0.132196	-2.11671	0.0342843	0.391536	ENSG00000089009
GGA2	1114.76	0.267436	0.126375	2.11621	0.034327	0.391778	ENSG00000103365
SLC25A53	419.429	0.58166	0.275085	2.11448	0.0344747	0.392968	ENSG00000269743
VPS25	931.967	-0.294687	0.139359	-2.11459	0.0344648	0.392968	ENSG00000131475
AC006963.1	51.9839	1.09835	0.520051	2.11201	0.0346859	0.393954	ENSG00000279587
BSDC1	2365.82	-0.2759	0.130596	-2.11263	0.0346327	0.393954	ENSG00000160058
FRG1CP	560.974	-0.525058	0.248614	-2.11194	0.0346916	0.393954	ENSG00000282826
LRTM2	44.6044	1.4017	0.66368	2.11201	0.0346858	0.393954	ENSG00000166159
NDUFB10	1411.68	-0.259318	0.122761	-2.11238	0.0346536	0.393954	ENSG00000140990
RAP2C	1782.51	0.426466	0.201837	2.11293	0.0346072	0.393954	ENSG00000123728
DYNLT3	865.879	-0.386423	0.183038	-2.11117	0.034758	0.394394	ENSG00000165169
LRP1B	1162.09	0.445092	0.210863	2.11081	0.0347883	0.394394	ENSG00000168702
SAXO2	131.363	0.5949	0.281877	2.1105	0.0348157	0.394394	ENSG00000188659
ZNF320	611.98	0.525903	0.249187	2.11048	0.0348174	0.394394	ENSG00000182986
KCNJ9	790.42	0.579808	0.274797	2.10995	0.0348626	0.394532	ENSG00000162728
TOGARAM2	12.8052	2.18988	1.03794	2.10983	0.0348731	0.394532	ENSG00000189350
COL7A1	734.397	0.52669	0.249679	2.10947	0.0349043	0.394607	ENSG00000114270
MRTFB	1085.14	0.373601	0.17713	2.10919	0.0349284	0.394607	ENSG00000186260
NSDHL	1284.4	-0.295793	0.140253	-2.10899	0.0349451	0.394607	ENSG00000147383
CORO2A	1770.6	-0.395075	0.187417	-2.108	0.0350313	0.395334	ENSG00000106789
AC135977.1	43.4901	-0.95006	0.451021	-2.10647	0.0351639	0.396584	ENSG00000226268
DGKH	1049.22	0.559573	0.26588	2.10461	0.0353256	0.397666	ENSG00000102780
FGF14	1844.89	0.566953	0.269361	2.10481	0.0353081	0.397666	ENSG00000102466
RBPMS	206.546	0.543405	0.258195	2.10463	0.0353233	0.397666	ENSG00000157110
PTPN20	45.9609	-1.28962	0.612869	-2.10424	0.0353572	0.397774	ENSG00000204179
GPR156	50.8587	-1.39948	0.665582	-2.10264	0.0354974	0.398115	ENSG00000175697
LTBP4	1213.98	0.453467	0.215639	2.1029	0.0354742	0.398115	ENSG00000090006
MCAM	890.949	-0.456723	0.2172	-2.10277	0.0354855	0.398115	ENSG00000076706
MFAP2	85.4894	-0.803096	0.38182	-2.10334	0.0354363	0.398115	ENSG00000117122
P2RX5	622.802	-0.452367	0.215051	-2.10353	0.0354192	0.398115	ENSG00000083454
ACACA	6360.59	-0.243736	0.115967	-2.10178	0.0355729	0.398492	ENSG00000278540
CMTM4	1096.24	0.29087	0.138394	2.10175	0.035575	0.398492	ENSG00000183723
PCDHGB2	92.9543	-1.08586	0.516906	-2.1007	0.0356676	0.399113	ENSG00000253910
SLC38A5	33.6838	1.09556	0.52154	2.10062	0.0356744	0.399113	ENSG00000017483
AL355032.1	14.0288	-2.17755	1.03678	-2.1003	0.0357027	0.399183	ENSG00000241494
TCP10L	102.252	0.842852	0.401499	2.09926	0.035794	0.399957	ENSG00000242220
DEPDC4	14.39	-1.65171	0.787076	-2.09854	0.0358576	0.400421	ENSG00000166153
AMZ2P1	334.622	0.385485	0.183788	2.09745	0.035954	0.400756	ENSG00000214174
GRM1	71.6381	0.93285	0.444717	2.09763	0.0359382	0.400756	ENSG00000152822
MT1X	32.5433	-1.38319	0.659324	-2.09789	0.0359146	0.400756	ENSG00000187193
AC066612.1	61.7143	1.04923	0.500342	2.09703	0.035991	0.400923	ENSG00000259235
MMD2	184.746	0.543493	0.259242	2.09647	0.0360405	0.401227	ENSG00000136297
TMEM147-AS1	236.849	0.442024	0.210919	2.09571	0.0361081	0.401486	ENSG00000236144
YIPF3	2788.18	-0.278519	0.132895	-2.09579	0.0361007	0.401486	ENSG00000137207
SULF1	468.559	0.6666	0.318133	2.09535	0.0361399	0.401593	ENSG00000137573
PRKCZ	1710.95	-0.309994	0.148029	-2.09415	0.0362469	0.402536	ENSG00000067606
MACO1	2319.9	-0.234464	0.112004	-2.09335	0.0363178	0.403076	ENSG00000204178
ARL4C	5054.72	0.365942	0.174997	2.09113	0.0365162	0.403555	ENSG00000188042
GPM6A	5077.26	0.419065	0.200328	2.09189	0.0364481	0.403555	ENSG00000150625
HSPA12A	8018.98	-0.304848	0.14571	-2.09216	0.0364244	0.403555	ENSG00000165868
SLC6A7	93.5468	0.904042	0.432209	2.09168	0.0364672	0.403555	ENSG00000011083
THOC5	1506.82	-0.298222	0.142604	-2.09126	0.0365047	0.403555	ENSG00000100296
TSPY26P	149.36	-0.74249	0.355067	-2.09113	0.0365168	0.403555	ENSG00000235217
ZNF488	96.7029	0.634883	0.303547	2.09155	0.036479	0.403555	ENSG00000265763
BAG5	1613.56	-0.294121	0.140672	-2.09082	0.036544	0.40361	ENSG00000166170
ADAMTS9	63.7666	1.31496	0.629309	2.08953	0.0366596	0.40464	ENSG00000163638
CCDC74A	346.592	0.481449	0.230479	2.0889	0.0367163	0.405004	ENSG00000163040
DIRAS3	11.1707	2.11193	1.01126	2.08842	0.0367596	0.405004	ENSG00000162595
ZNF677	1129.37	-0.320649	0.153519	-2.08866	0.0367383	0.405004	ENSG00000197928
COX4I1	5197.11	-0.291714	0.139743	-2.0875	0.0368426	0.405207	ENSG00000131143
GDF1	163.851	-0.918485	0.439998	-2.08748	0.0368452	0.405207	ENSG00000130283
RARRES2	19.2634	2.02524	0.970008	2.08786	0.0368103	0.405207	ENSG00000106538
LINC00847	273.498	-0.422071	0.202277	-2.0866	0.0369245	0.405833	ENSG00000245060
C2orf27A	178.527	0.620778	0.297736	2.08499	0.03707	0.407185	ENSG00000287151
C2orf27A	178.527	0.620778	0.297736	2.08499	0.03707	0.407185	ENSG00000197927
IQCH	71.3859	0.814772	0.39102	2.08371	0.0371864	0.408218	ENSG00000103599
PAXBP1-AS1	374.836	0.36179	0.173711	2.0827	0.0372782	0.408729	ENSG00000238197
SPRED2	2483.53	-0.251506	0.120751	-2.08285	0.0372647	0.408729	ENSG00000198369
DEPP1	157.698	-0.530777	0.254941	-2.08196	0.0373463	0.409006	ENSG00000165507
ZNF763	104.245	-0.759882	0.364988	-2.08193	0.0373485	0.409006	ENSG00000197054
AC007262.2	33.8187	1.08245	0.52015	2.08104	0.0374302	0.409158	ENSG00000284959
OR7C1	13.0669	-2.28475	1.09783	-2.08115	0.0374201	0.409158	ENSG00000127530
TMEM233	519.005	-0.750284	0.360464	-2.08144	0.0373939	0.409158	ENSG00000224982
STN1	989.987	-0.316686	0.152216	-2.0805	0.0374795	0.409451	ENSG00000107960
USP8	1145.24	0.287707	0.138306	2.08023	0.0375048	0.40948	ENSG00000138592
CAPRIN1	11158.7	-0.246524	0.118598	-2.07866	0.0376483	0.409687	ENSG00000135387
CCDC88B	115.678	0.745144	0.358494	2.07854	0.0376594	0.409687	ENSG00000168071
NBEA	5736.9	0.463389	0.222825	2.07962	0.0375608	0.409687	ENSG00000172915
PREX2	34.3817	1.2393	0.5962	2.07866	0.0376485	0.409687	ENSG00000046889
RHOQ	2798.07	-0.322078	0.154899	-2.07928	0.0375919	0.409687	ENSG00000119729
SYT15	231.603	-0.657046	0.315978	-2.0794	0.0375804	0.409687	ENSG00000204176
TAF8	229.495	-0.517427	0.249001	-2.07801	0.0377086	0.40993	ENSG00000137413
VAX2	160.984	-0.815885	0.392666	-2.07781	0.0377269	0.40993	ENSG00000116035
AC004943.2	75.809	-0.713138	0.343263	-2.07753	0.0377531	0.409943	ENSG00000259768
RPUSD4	575.73	-0.39731	0.191262	-2.07731	0.0377734	0.409943	ENSG00000165526
PTPA	3687.27	-0.262377	0.126339	-2.07677	0.0378226	0.410231	ENSG00000119383
GULP1	137.059	0.87543	0.421833	2.0753	0.0379587	0.411437	ENSG00000144366
NKAIN2	1623.08	-0.409602	0.197391	-2.07508	0.0379792	0.411437	ENSG00000188580
CNPY3	769.772	-0.283192	0.136587	-2.07334	0.0381405	0.411945	ENSG00000137161
DNAH5	51.7734	0.974504	0.47006	2.07315	0.0381582	0.411945	ENSG00000039139
EEF1A2	16815.9	-0.21279	0.102677	-2.07241	0.0382268	0.411945	ENSG00000101210
KLF8	415.944	-0.471625	0.227565	-2.07248	0.0382205	0.411945	ENSG00000102349
MICAL2	89.7856	0.775003	0.373964	2.0724	0.0382281	0.411945	ENSG00000133816
R3HDM1	4038.66	-0.348413	0.168009	-2.07377	0.0381007	0.411945	ENSG00000048991
RBKS	132.223	0.600464	0.289566	2.07367	0.0381104	0.411945	ENSG00000171174
RNMT	2840.46	-0.275828	0.133097	-2.07237	0.0382306	0.411945	ENSG00000101654
TIGAR	809.517	-0.337031	0.162527	-2.07369	0.038108	0.411945	ENSG00000078237
AL132639.2	14.1953	-1.62463	0.784258	-2.07156	0.0383069	0.412461	ENSG00000258940
KMT5A	648.18	-0.337051	0.162719	-2.07137	0.038324	0.412461	ENSG00000183955
ZBTB41	1962.19	0.339015	0.163715	2.07076	0.0383809	0.412829	ENSG00000177888
SHLD2P1	54.8778	-1.58899	0.76788	-2.06933	0.0385155	0.41403	ENSG00000165874
LATS2	650.347	-0.491993	0.237789	-2.06904	0.0385427	0.414077	ENSG00000150457
DERL2	1163.84	-0.267414	0.129291	-2.06831	0.0386108	0.414563	ENSG00000072849
S100A13	423.564	-0.345265	0.167001	-2.06744	0.0386926	0.415195	ENSG00000189171
AP1M1	5169.36	-0.86716	0.419705	-2.06612	0.0388174	0.415796	ENSG00000072958
CAMKK2	3371.24	-0.297109	0.143768	-2.06659	0.0387732	0.415796	ENSG00000110931
COL27A1	25.371	1.34739	0.652126	2.06614	0.0388148	0.415796	ENSG00000196739
CFC1	50.8142	1.21272	0.587105	2.06559	0.0388676	0.415842	ENSG00000136698
KDM4A	3028.99	-0.235784	0.11414	-2.06574	0.0388534	0.415842	ENSG00000066135
ZNF561	749.597	-0.319419	0.154705	-2.0647	0.0389512	0.416491	ENSG00000171469
ACADS	122.842	-0.550561	0.266747	-2.06398	0.0390195	0.416907	ENSG00000122971
SCRN1	15945.7	-0.200838	0.0973143	-2.06381	0.0390362	0.416907	ENSG00000136193
FGFR1OP	671.563	0.355322	0.172219	2.0632	0.0390937	0.417276	ENSG00000213066
DHCR7	4488.69	-0.260537	0.126312	-2.06265	0.0391456	0.417584	ENSG00000172893
UBXN1	1103.93	-0.261513	0.126826	-2.06198	0.0392101	0.418025	ENSG00000162191
UPK3BL1	85.1135	1.63326	0.79251	2.06088	0.0393148	0.418896	ENSG00000267368
ADAM11	4868.7	-0.52567	0.255297	-2.05905	0.0394891	0.420505	ENSG00000073670
OLFML2B	119.7	-0.559068	0.271606	-2.05838	0.0395537	0.420946	ENSG00000162745
COTL1	6230.58	-0.236634	0.114995	-2.05777	0.0396118	0.421317	ENSG00000103187
CHP1	2426	-0.266291	0.129454	-2.05704	0.0396828	0.421825	ENSG00000187446
AC244669.2	195.354	-0.574658	0.279528	-2.05582	0.0398	0.422575	ENSG00000274642
HIST2H2BC	408.865	0.516305	0.251133	2.0559	0.0397918	0.422575	ENSG00000261716
AUTS2	7076.4	0.268302	0.130606	2.05428	0.0399481	0.423403	ENSG00000158321
NKIRAS1	661.631	0.412336	0.200697	2.05451	0.0399259	0.423403	ENSG00000197885
SHOX2	1514.94	-1.58979	0.773815	-2.05449	0.0399287	0.423403	ENSG00000168779
SLX1B-SULT1A4	490.378	0.396954	0.193313	2.05343	0.0400311	0.424034	ENSG00000260280
AP003559.1	95.8262	0.675231	0.328975	2.05253	0.0401183	0.424215	ENSG00000256443
CAMK2A	1494.39	0.520787	0.253722	2.05259	0.0401128	0.424215	ENSG00000070808
PKDCC	754.88	0.444796	0.216695	2.05264	0.0401076	0.424215	ENSG00000162878
RPL34	3321.84	-0.248323	0.121017	-2.05196	0.0401736	0.424552	ENSG00000109475
MFAP3L	418.713	0.458046	0.223338	2.05091	0.040276	0.425386	ENSG00000198948
TMEM179	1575.9	-0.281402	0.137253	-2.05025	0.04034	0.425814	ENSG00000258986
RPS6KA6	1453.86	0.355636	0.173497	2.04981	0.0403834	0.426024	ENSG00000072133
INTS8	776.333	0.364143	0.177686	2.04936	0.0404268	0.426233	ENSG00000164941
TRIP6	17.9272	-1.29389	0.631774	-2.04803	0.040557	0.427358	ENSG00000087077
ATP6V1G1	3487.46	-0.28362	0.138518	-2.04753	0.0406057	0.427622	ENSG00000136888
GNB3	244.671	0.440369	0.215176	2.04655	0.0407023	0.427646	ENSG00000111664
KHNYN	931.936	-0.274092	0.133917	-2.04673	0.0406844	0.427646	ENSG00000100441
MOSPD1	412.245	0.409472	0.200068	2.04666	0.040691	0.427646	ENSG00000101928
RHOC	1800.79	-0.3882	0.18967	-2.04671	0.0406865	0.427646	ENSG00000155366
AC005224.3	252.503	-0.809133	0.395831	-2.04414	0.0409397	0.428861	ENSG00000266709
CDH3	173.452	-0.684749	0.33504	-2.04378	0.0409753	0.428861	ENSG00000062038
DIO3OS	14.5127	-1.69002	0.826698	-2.0443	0.0409241	0.428861	ENSG00000258498
EXD3	333.534	0.494536	0.241832	2.04496	0.0408589	0.428861	ENSG00000187609
KIF16B	142.861	0.601998	0.294481	2.04427	0.040927	0.428861	ENSG00000089177
MCM6	507.522	-0.311246	0.152299	-2.04365	0.040988	0.428861	ENSG00000076003
TSPEAR	43.4659	1.42158	0.695374	2.04434	0.0409201	0.428861	ENSG00000175894
ZNF30	354.44	-0.446187	0.218349	-2.04346	0.0410073	0.428861	ENSG00000168661
TFE3	2115.8	0.468951	0.229584	2.04261	0.041091	0.429488	ENSG00000068323
AC008969.1	1090.54	-0.30123	0.147689	-2.03962	0.0413883	0.429901	ENSG00000176593
AC092969.1	348.196	0.693146	0.339963	2.03889	0.0414611	0.429901	ENSG00000240086
AP005018.2	35.5092	-0.968622	0.474805	-2.04004	0.041346	0.429901	ENSG00000254851
CDK5RAP3	1195.92	0.419374	0.205669	2.03907	0.0414434	0.429901	ENSG00000108465
DNAH2	58.9187	0.842888	0.413003	2.04087	0.0412634	0.429901	ENSG00000183914
ISY1	226.084	-0.455397	0.223137	-2.04088	0.0412624	0.429901	ENSG00000240682
KCNQ3	2646.9	0.493209	0.241857	2.03926	0.0414244	0.429901	ENSG00000184156
LHFPL2	118.178	0.649282	0.318451	2.03887	0.0414626	0.429901	ENSG00000145685
MAP3K11	619.056	-0.39037	0.191253	-2.04112	0.0412393	0.429901	ENSG00000173327
REPIN1	3368.91	-0.273592	0.134145	-2.03953	0.0413975	0.429901	ENSG00000214022
RNF5	2994.06	-0.251343	0.123142	-2.04108	0.0412428	0.429901	ENSG00000204308
RPS19BP1	1110.41	-0.308577	0.151265	-2.03997	0.041353	0.429901	ENSG00000187051
SESN3	3206.15	0.360388	0.176599	2.04071	0.0412798	0.429901	ENSG00000149212
VWC2	497.676	0.415842	0.203876	2.03968	0.0413822	0.429901	ENSG00000188730
CTBS	64.7368	0.767068	0.376346	2.0382	0.04153	0.430108	ENSG00000117151
TACC3	191.452	-0.435813	0.21382	-2.03822	0.0415281	0.430108	ENSG00000013810
FKBP1B	1474.64	-0.273776	0.134412	-2.03685	0.0416653	0.431017	ENSG00000119782
SLC1A5	440.974	-0.627964	0.3083	-2.03686	0.041664	0.431017	ENSG00000105281
PXYLP1	1234	0.317233	0.155796	2.0362	0.0417298	0.431438	ENSG00000155893
NT5C3AP1	33.9809	1.43407	0.705227	2.03348	0.0420039	0.434024	ENSG00000213492
ATL3	234.727	-0.547169	0.269247	-2.03222	0.0421318	0.434823	ENSG00000184743
HPCAL1	3515.09	0.224269	0.110368	2.03201	0.0421531	0.434823	ENSG00000115756
Z84466.1	49.0937	0.877967	0.431973	2.03246	0.0421074	0.434823	ENSG00000283743
ABCA1	219.499	0.480235	0.236373	2.03168	0.042186	0.434915	ENSG00000165029
AC007390.2	27.3856	1.34581	0.662665	2.03091	0.0422646	0.435234	ENSG00000272054
TMEM38B	113.49	0.560684	0.276077	2.0309	0.042265	0.435234	ENSG00000095209
AC016026.1	27.8164	1.86692	0.919722	2.02988	0.0423689	0.436055	ENSG00000093100
TUBB2A	41008	-0.191474	0.0943505	-2.02939	0.0424188	0.436202	ENSG00000137267
ZFAS1	1018.53	-0.377565	0.18606	-2.02927	0.0424312	0.436202	ENSG00000177410
AC244517.6	15.3231	1.95498	0.963697	2.02863	0.0424962	0.436486	ENSG00000279068
CYP2D6	147.05	0.55656	0.274378	2.02844	0.0425153	0.436486	ENSG00000100197
PHF24	1258.34	-0.398973	0.196704	-2.02828	0.0425312	0.436486	ENSG00000122733
BHLHE40	99.8888	1.02477	0.505302	2.02803	0.0425567	0.436501	ENSG00000134107
FAM135B	393.572	-2.09325	1.03245	-2.02747	0.0426148	0.43685	ENSG00000147724
ARL2BP	2204.15	-0.234069	0.115545	-2.02578	0.0427869	0.438366	ENSG00000102931
SCG2	8975.11	0.424391	0.209558	2.02518	0.0428494	0.438758	ENSG00000171951
LAMA5	2226.12	0.293077	0.144853	2.02327	0.0430449	0.440511	ENSG00000130702
HTATIP2	136.316	-0.554163	0.274007	-2.02245	0.0431303	0.440514	ENSG00000109854
PDP2	685.111	0.345058	0.170642	2.02212	0.0431644	0.440514	ENSG00000172840
SSBP2	1745.35	0.256261	0.126702	2.02256	0.0431187	0.440514	ENSG00000145687
TMC6	32.5364	1.17962	0.58325	2.02248	0.0431263	0.440514	ENSG00000141524
TMEFF1	10412.5	-0.198078	0.0979569	-2.02209	0.0431666	0.440514	ENSG00000241697
EIF3CL	7061.4	-0.233271	0.115382	-2.02172	0.0432049	0.440656	ENSG00000205609
NEU4	14.4939	1.78829	0.88472	2.02131	0.0432477	0.440845	ENSG00000204099
AC129492.3	486.006	-0.35562	0.176026	-2.02027	0.0433558	0.441264	ENSG00000263620
DHX8	1470.66	-0.313698	0.15528	-2.02021	0.0433619	0.441264	ENSG00000067596
NDUFS3	1353.83	-0.23361	0.115615	-2.02058	0.0433233	0.441264	ENSG00000213619
ENC1	9139.01	-0.420616	0.208332	-2.01897	0.0434907	0.442326	ENSG00000171617
PGAM1	7194.44	-0.203262	0.100754	-2.01741	0.0436528	0.443725	ENSG00000171314
CDK8	892.145	0.270209	0.133971	2.01692	0.0437039	0.443747	ENSG00000132964
MAPT-IT1	79.3638	-0.659916	0.327186	-2.01694	0.0437014	0.443747	ENSG00000279685
M6PR	898.723	0.253509	0.12573	2.0163	0.0437685	0.444155	ENSG00000003056
AC025048.6	267.954	-0.532604	0.264313	-2.01505	0.0438996	0.444472	ENSG00000280852
ASAH1	2531.64	0.231901	0.115077	2.01518	0.0438854	0.444472	ENSG00000104763
MAMDC4	288.194	0.608256	0.301754	2.01573	0.043828	0.444472	ENSG00000177943
SUSD1	615.739	-0.341854	0.169669	-2.01483	0.0439224	0.444472	ENSG00000106868
TYMP	51.3021	-0.760135	0.377245	-2.01497	0.0439081	0.444472	ENSG00000025708
GGT1	77.3871	0.65758	0.32655	2.01372	0.0440391	0.445404	ENSG00000286070
GGT1	77.3871	0.65758	0.32655	2.01372	0.0440391	0.445404	ENSG00000100031
AC245407.2	48.5187	0.871862	0.433307	2.01211	0.0442079	0.446002	ENSG00000287978
CCDC8	81.8143	-0.987325	0.490858	-2.01143	0.0442802	0.446002	ENSG00000169515
FBLN1	732.957	-0.413067	0.205315	-2.01186	0.0442342	0.446002	ENSG00000077942
HEXIM2	161.424	-0.475893	0.236614	-2.01126	0.0442979	0.446002	ENSG00000168517
KARS	2934.96	-0.313251	0.155712	-2.01173	0.0442487	0.446002	ENSG00000065427
NEK11	131.785	0.597958	0.297085	2.01275	0.0441409	0.446002	ENSG00000114670
NXPH2	263.506	-1.61312	0.801526	-2.01257	0.0441602	0.446002	ENSG00000144227
STX3	991.334	0.401401	0.199597	2.01106	0.0443196	0.446002	ENSG00000166900
TPD52L2	2314.67	-0.244008	0.121252	-2.0124	0.0441775	0.446002	ENSG00000101150
SERPINI1	3175.06	-0.406265	0.202146	-2.00976	0.0444567	0.447133	ENSG00000163536
SUPT4H1	1060.71	-0.279632	0.139281	-2.00769	0.0446767	0.449097	ENSG00000213246
RGS3	1456.73	0.418676	0.208573	2.00734	0.0447136	0.449218	ENSG00000138835
DLL1	360.875	-0.565875	0.282095	-2.00597	0.0448593	0.449436	ENSG00000198719
HBEGF	612.458	-0.326092	0.162494	-2.0068	0.0447715	0.449436	ENSG00000113070
KDM5C	6660.34	0.378735	0.188802	2.00599	0.0448573	0.449436	ENSG00000126012
TMEM97	2165.09	-0.423671	0.211133	-2.00666	0.0447859	0.449436	ENSG00000109084
WRNIP1	1925.18	0.218232	0.108768	2.0064	0.0448136	0.449436	ENSG00000124535
RBM20	115.536	-0.649213	0.323692	-2.00565	0.0448938	0.449534	ENSG00000203867
AP3S2	2376.47	-0.237901	0.118652	-2.00504	0.0449592	0.449691	ENSG00000157823
ITSN2	662.006	0.326053	0.162599	2.00525	0.0449359	0.449691	ENSG00000198399
AP001324.1	74.8938	-0.66355	0.331077	-2.00422	0.0450469	0.449991	ENSG00000227615
DTX1	2256.3	0.429404	0.214366	2.00313	0.0451629	0.449991	ENSG00000135144
FAF2	2014.19	-0.240097	0.11979	-2.00432	0.0450363	0.449991	ENSG00000113194
FAM133A	190.31	0.721933	0.360236	2.00406	0.045064	0.449991	ENSG00000179083
HMOX1	96.0618	-0.685295	0.342006	-2.00375	0.0450967	0.449991	ENSG00000100292
TMSB15A	1087.58	-0.32902	0.164222	-2.00351	0.0451225	0.449991	ENSG00000158164
ZNF354C	736.586	-0.385261	0.192311	-2.00332	0.045143	0.449991	ENSG00000177932
LINC01122	177.722	-0.522399	0.260849	-2.00269	0.0452107	0.450219	ENSG00000233723
ARHGEF33	81.1086	-0.739699	0.369437	-2.00223	0.0452597	0.45046	ENSG00000214694
AC068205.2	44.2677	0.867386	0.433357	2.00155	0.045333	0.450694	ENSG00000283341
SYMPK	2129.76	-0.317012	0.15838	-2.00159	0.0453293	0.450694	ENSG00000125755
AC006329.1	34.6719	1.08221	0.540988	2.00043	0.0454537	0.451399	ENSG00000232445
PPP1R15A	1880.95	-0.314211	0.157066	-2.0005	0.0454466	0.451399	ENSG00000087074
RASSF4	349.929	-0.501642	0.250876	-1.99956	0.0455478	0.451849	ENSG00000107551
VSIG1	30.2556	1.59363	0.796997	1.99955	0.0455489	0.451849	ENSG00000101842
AC087741.1	171.224	0.465507	0.232931	1.99848	0.0456646	0.452055	ENSG00000262580
DNAAF4-CCPG1	55.7987	6.91047	3.45737	1.99876	0.0456339	0.452055	ENSG00000261771
GPC2	9364.14	-0.317562	0.158882	-1.99873	0.0456371	0.452055	ENSG00000213420
ROR2	95.7532	1.06363	0.53223	1.99844	0.0456695	0.452055	ENSG00000169071
IMP3	971.466	-0.310268	0.155291	-1.99798	0.045719	0.452299	ENSG00000177971
BBIP1	564.659	0.314451	0.157537	1.99604	0.0459293	0.453883	ENSG00000214413
LINC00242	54.7147	-0.850653	0.426127	-1.99624	0.0459077	0.453883	ENSG00000229214
LINC02614	42.7021	0.864005	0.432926	1.99573	0.045963	0.453969	ENSG00000241288
AC008429.2	50.1666	0.836186	0.419164	1.99489	0.0460549	0.454629	ENSG00000253785
CLIP4	352.889	0.434945	0.218071	1.99452	0.0460957	0.454784	ENSG00000115295
NRG1	5975.35	-0.267833	0.134353	-1.99351	0.046206	0.455625	ENSG00000157168
CORO7	2555.59	-0.277589	0.1393	-1.99274	0.04629	0.456205	ENSG00000262246
CAPZB	4525.21	-0.251673	0.126371	-1.99153	0.0464223	0.45705	ENSG00000077549
VWA1	187.9	-0.649878	0.326326	-1.9915	0.0464262	0.45705	ENSG00000179403
C22orf39	1472.53	-0.262922	0.132104	-1.99026	0.0465618	0.458136	ENSG00000242259
SCN7A	1401.97	-0.32683	0.164298	-1.98925	0.0466732	0.458983	ENSG00000136546
ARRB1	5745.63	-0.270897	0.13622	-1.98867	0.0467373	0.459115	ENSG00000137486
PRKAA2	911.319	0.339066	0.170489	1.98879	0.0467245	0.459115	ENSG00000162409
TOR2A	792.001	-0.300669	0.151301	-1.98722	0.0468984	0.460448	ENSG00000160404
PCDHA12	3241.58	-0.326179	0.1642	-1.98647	0.0469811	0.46101	ENSG00000251664
DISP3	1356.25	-0.370247	0.186561	-1.98459	0.0471898	0.462607	ENSG00000204624
STK32B	865.612	0.338321	0.170478	1.98455	0.0471949	0.462607	ENSG00000152953
DISP1	277.067	0.422111	0.212724	1.98432	0.0472206	0.462608	ENSG00000154309
SHISAL2A	81.5074	0.757724	0.382175	1.98266	0.0474049	0.463799	ENSG00000182183
UBE2L6	2021	-0.228663	0.115323	-1.98281	0.0473883	0.463799	ENSG00000156587
ZNF333	531.47	0.39737	0.200435	1.98254	0.0474189	0.463799	ENSG00000160961
AC007566.1	288.731	0.504052	0.254298	1.98213	0.0474645	0.463827	ENSG00000244055
AC022893.2	547.46	-0.332746	0.167935	-1.9814	0.0475465	0.463827	ENSG00000260838
ASPH	983.3	0.271215	0.13684	1.98198	0.0474811	0.463827	ENSG00000198363
FAM117B	2142.74	-0.280857	0.14173	-1.98164	0.0475196	0.463827	ENSG00000138439
FANCM	153.082	-0.56519	0.285384	-1.98046	0.0476521	0.463827	ENSG00000187790
KMO	27.6091	1.79138	0.904125	1.98134	0.0475533	0.463827	ENSG00000117009
SLC19A2	511.821	0.414234	0.209103	1.981	0.0475907	0.463827	ENSG00000117479
TMEM50A	2646.82	-0.224189	0.113198	-1.9805	0.0476471	0.463827	ENSG00000183726
ZBTB45	1011.19	-0.308314	0.155659	-1.9807	0.0476244	0.463827	ENSG00000119574
CBWD6	332.047	0.395323	0.199681	1.97978	0.0477288	0.464109	ENSG00000215126
IQCH-AS1	103.363	0.671823	0.339387	1.97952	0.0477578	0.464109	ENSG00000259673
STOX2	3396.79	0.235047	0.118728	1.9797	0.0477371	0.464109	ENSG00000173320
AC009690.1	570.054	1.24196	0.627836	1.97816	0.0479102	0.464261	ENSG00000260729
CNEP1R1	325.28	0.382737	0.193429	1.97869	0.0478506	0.464261	ENSG00000205423
FAM181B	218.714	0.553865	0.27997	1.9783	0.0478952	0.464261	ENSG00000182103
LINC01351	27.7677	1.13603	0.574322	1.97803	0.0479248	0.464261	ENSG00000237457
PLPPR3	14950.7	-0.24407	0.123406	-1.97779	0.0479529	0.464261	ENSG00000129951
SLC48A1	647.839	0.380309	0.192252	1.97818	0.0479083	0.464261	ENSG00000211584
STX16	1154.44	0.250252	0.12653	1.9778	0.0479507	0.464261	ENSG00000124222
AGAP4	307.916	0.443074	0.224113	1.97701	0.0480403	0.464364	ENSG00000188234
FO681492.1	518.022	-0.603546	0.305241	-1.97728	0.0480106	0.464364	ENSG00000277758
TP53TG1	222.855	0.466575	0.235995	1.97705	0.0480356	0.464364	ENSG00000182165
ADAM9	477.739	0.32364	0.16373	1.97667	0.0480785	0.464486	ENSG00000168615
NUDT13	47.4181	0.814747	0.412333	1.97595	0.0481608	0.465033	ENSG00000166321
DSTNP2	65.5708	-0.804243	0.407363	-1.97427	0.0483514	0.466128	ENSG00000248593
PAN2	760.418	0.348643	0.176564	1.97459	0.0483144	0.466128	ENSG00000135473
RPL41P5	36.9609	-0.933992	0.473031	-1.97448	0.0483269	0.466128	ENSG00000256393
EXOSC6	2382.21	-0.229968	0.116509	-1.97381	0.0484032	0.46638	ENSG00000223496
DCAF4	449.576	-0.352877	0.178892	-1.97256	0.0485454	0.466642	ENSG00000119599
HMGB1	5671.8	-0.343873	0.174359	-1.97222	0.048585	0.466642	ENSG00000189403
HOXD1	62.6002	-2.74332	1.39045	-1.97298	0.0484979	0.466642	ENSG00000128645
KCNIP1	884.844	0.367754	0.18641	1.97282	0.0485157	0.466642	ENSG00000182132
SLC23A2	3341.38	0.21762	0.11034	1.97227	0.0485791	0.466642	ENSG00000089057
TSPO	52.1282	-0.845154	0.428508	-1.97232	0.0485732	0.466642	ENSG00000100300
AK5	779.777	0.370523	0.187896	1.97196	0.0486147	0.466681	ENSG00000154027
ZBTB46	2496.91	-0.260722	0.132252	-1.9714	0.0486781	0.467042	ENSG00000130584
AL358472.6	286.146	-0.568984	0.288654	-1.97116	0.0487051	0.467053	ENSG00000285641
AC132872.1	93.1562	0.600864	0.304895	1.97073	0.0487553	0.467288	ENSG00000260563
ALOXE3	37.7479	-1.12685	0.572192	-1.96935	0.0489131	0.468072	ENSG00000179148
NRGN	88.6376	0.863176	0.438289	1.96942	0.0489044	0.468072	ENSG00000154146
RPAP3	1289.75	0.330638	0.167893	1.96933	0.0489147	0.468072	ENSG00000005175
ELOCP2	37.85	-1.55354	0.789235	-1.96841	0.0490204	0.468475	ENSG00000259838
TLCD4	215.393	0.521563	0.264979	1.96831	0.0490318	0.468475	ENSG00000152078
ZBTB3	154.709	-0.546616	0.27771	-1.96829	0.0490342	0.468475	ENSG00000185670
LEF1	98.9885	-2.37816	1.20883	-1.96733	0.0491451	0.469159	ENSG00000138795
SHC3	6231.94	0.255797	0.130029	1.96722	0.0491576	0.469159	ENSG00000148082
MYRF	105.796	0.713534	0.362878	1.96632	0.0492616	0.469299	ENSG00000124920
PCBP3	1445.04	-0.485923	0.247139	-1.9662	0.0492759	0.469299	ENSG00000183570
PEBP1	12113.1	-0.188172	0.0956774	-1.96673	0.0492145	0.469299	ENSG00000089220
REEP3	310.373	-0.380774	0.193655	-1.96625	0.0492696	0.469299	ENSG00000165476
LMO3	1719.05	0.5602	0.284952	1.96595	0.0493048	0.469328	ENSG00000048540
AC016582.3	641.116	-0.393898	0.200488	-1.9647	0.0494492	0.469831	ENSG00000267640
AC108010.1	159.33	0.471455	0.239976	1.96459	0.0494614	0.469831	ENSG00000242588
RPL13A	13304.6	-0.287585	0.146355	-1.96499	0.0494158	0.469831	ENSG00000142541
SAMD3	122.999	-0.81125	0.412896	-1.96478	0.0494395	0.469831	ENSG00000164483
CXXC4-AS1	13.885	1.73006	0.880767	1.96426	0.0494999	0.469951	ENSG00000245384
CNPPD1	1961.82	-0.265193	0.135108	-1.96282	0.0496673	0.471293	ENSG00000115649
AL355987.2	12.4213	-2.13737	1.08922	-1.9623	0.0497278	0.471373	ENSG00000272679
NT5E	38.6352	1.25533	0.6397	1.96237	0.0497195	0.471373	ENSG00000135318
SMG1	5198.23	0.267151	0.136167	1.96194	0.0497698	0.471526	ENSG00000157106
RPL18A	7301.54	-0.297607	0.151758	-1.96106	0.0498724	0.472251	ENSG00000105640
GRIK1-AS1	15.0363	2.31038	1.17884	1.95988	0.05001	0.473307	ENSG00000174680
FASN	35796	-0.239003	0.122145	-1.95671	0.0503812	0.476571	ENSG00000169710
HIST1H3E	169.324	-0.711697	0.363783	-1.95638	0.0504205	0.476693	ENSG00000274750
AC027243.2	30.7254	-1.41332	0.723129	-1.95445	0.0506483	0.477861	ENSG00000270036
DDX19B	1084.97	-0.301909	0.154473	-1.95444	0.0506494	0.477861	ENSG00000157349
SHH	75.5968	-1.15285	0.589685	-1.95502	0.0505807	0.477861	ENSG00000164690
ZNF844	501.589	-0.364372	0.186405	-1.95473	0.0506145	0.477861	ENSG00000223547
CBR3-AS1	23.487	1.24805	0.638797	1.95375	0.0507308	0.477882	ENSG00000236830
GABRG2	907.934	0.479511	0.245406	1.95395	0.0507074	0.477882	ENSG00000113327
PHACTR2P1	24.1548	1.16331	0.595304	1.95415	0.0506833	0.477882	ENSG00000270300
ABL2	2201.83	0.301912	0.154638	1.95238	0.0508926	0.478096	ENSG00000143322
ADCYAP1R1	2799.97	0.239252	0.122554	1.95222	0.0509118	0.478096	ENSG00000078549
CAMK1G	211.393	0.693933	0.355356	1.95278	0.0508455	0.478096	ENSG00000008118
MST1P2	28.911	0.97618	0.499954	1.95254	0.0508745	0.478096	ENSG00000186301
RPL22	4414.49	-0.234438	0.120041	-1.95299	0.0508212	0.478096	ENSG00000116251
SLC35C1	1196.85	-0.232707	0.119153	-1.95302	0.0508174	0.478096	ENSG00000181830
LRPAP1	3119.79	0.288127	0.147637	1.95159	0.050987	0.478401	ENSG00000163956
TSPAN2	2448.19	-0.281434	0.144214	-1.9515	0.050997	0.478401	ENSG00000134198
RPS15	5734.06	-0.28894	0.148119	-1.95074	0.0510885	0.479011	ENSG00000115268
GRM7	525.317	0.53222	0.273254	1.94771	0.0514491	0.482142	ENSG00000196277
HLA-A	301.868	-0.396043	0.203573	-1.94546	0.0517195	0.484426	ENSG00000206503
NKILA	19.5563	1.40807	0.723864	1.94521	0.0517498	0.484459	ENSG00000278709
OSBPL10	695.856	-0.573342	0.294862	-1.94444	0.0518421	0.485073	ENSG00000144645
AL139011.2	12.766	-2.94866	1.5168	-1.94401	0.0518946	0.485313	ENSG00000258465
ST6GALNAC3	445.685	0.380847	0.195932	1.94377	0.0519227	0.485326	ENSG00000184005
DOCK11	1545.73	0.389784	0.200699	1.94213	0.0521213	0.486921	ENSG00000147251
LHFPL6	3298.18	-0.268359	0.138193	-1.94192	0.0521471	0.486921	ENSG00000183722
PXK	897.036	0.315697	0.162653	1.94092	0.0522681	0.487541	ENSG00000168297
TRMT9B	770.864	0.55824	0.287648	1.9407	0.0522941	0.487541	ENSG00000250305
ZNF702P	381.085	-0.48411	0.249418	-1.94096	0.0522631	0.487541	ENSG00000242779
CENPB	2108.27	-0.248937	0.128334	-1.93976	0.0524086	0.48762	ENSG00000125817
FABP3	838.521	-0.427094	0.22018	-1.93975	0.0524103	0.48762	ENSG00000121769
POLR1E	549.059	-0.327212	0.168652	-1.94016	0.0523603	0.48762	ENSG00000137054
RPL17-C18orf32	594.794	-1.55107	0.799359	-1.94039	0.0523328	0.48762	ENSG00000215472
SLC45A3	500.015	-0.485063	0.250212	-1.93861	0.0525486	0.488656	ENSG00000158715
ELP1	4115.69	0.193591	0.0998777	1.93828	0.0525892	0.488689	ENSG00000070061
HGFAC	183.333	0.594705	0.306843	1.93814	0.052606	0.488689	ENSG00000109758
C1QTNF1	121.578	-0.570272	0.294311	-1.93765	0.0526661	0.488819	ENSG00000173918
CCDC103	72.1812	0.760218	0.392581	1.93646	0.0528114	0.488819	ENSG00000167131
CPSF4	771.488	0.319189	0.164774	1.93713	0.0527289	0.488819	ENSG00000160917
GOLT1A	82.8804	0.857839	0.44304	1.93626	0.0528363	0.488819	ENSG00000174567
PDE4A	384.182	-0.39529	0.204174	-1.93604	0.0528628	0.488819	ENSG00000065989
RGS10	1035.13	-0.939362	0.485075	-1.93653	0.0528028	0.488819	ENSG00000148908
RNF39	248.091	-0.436955	0.225525	-1.93751	0.0526835	0.488819	ENSG00000204618
SH3D19	640.014	-0.410359	0.211954	-1.93608	0.0528583	0.488819	ENSG00000109686
USP35	1197.8	-0.270615	0.139704	-1.93705	0.0527386	0.488819	ENSG00000118369
ANKRD36BP2	75.6891	-0.915179	0.472918	-1.93517	0.0529692	0.489312	ENSG00000230006
RBM10	2506.72	0.309303	0.159833	1.93516	0.0529701	0.489312	ENSG00000182872
TRIM8	3051.84	-0.237882	0.122964	-1.93456	0.0530438	0.489743	ENSG00000171206
LMBRD1	1433.07	0.32653	0.168818	1.93422	0.0530862	0.489885	ENSG00000168216
AC010615.2	233.101	-0.458206	0.237049	-1.93296	0.0532413	0.490567	ENSG00000268119
AC243562.1	32.4081	6.83726	3.53701	1.93306	0.0532288	0.490567	ENSG00000259570
CTNND2	11919.2	-0.208464	0.107826	-1.93334	0.0531937	0.490567	ENSG00000169862
GRAMD1B	1439.75	0.474562	0.245557	1.9326	0.0532859	0.490729	ENSG00000023171
SLFN13	13.4286	1.58021	0.818197	1.93134	0.0534415	0.491911	ENSG00000154760
CSNK1A1	7335.76	-0.320457	0.165971	-1.9308	0.0535074	0.492018	ENSG00000113712
ERMP1	516.905	0.296847	0.153728	1.93099	0.053484	0.492018	ENSG00000099219
AC091564.5	44.7022	0.822628	0.426472	1.92891	0.0537416	0.492278	ENSG00000255410
CENPVL3	161.876	0.711792	0.368817	1.92993	0.0536152	0.492278	ENSG00000224109
ITGB1	6164.1	-0.27054	0.140243	-1.92907	0.0537217	0.492278	ENSG00000150093
MPDU1	924.691	-0.369689	0.191665	-1.92882	0.0537529	0.492278	ENSG00000129255
NAA60	1418.68	-0.247052	0.128065	-1.92912	0.0537161	0.492278	ENSG00000122390
RPL11	3816.13	-0.218126	0.113036	-1.9297	0.0536437	0.492278	ENSG00000142676
RPS18	6594.93	-0.262154	0.135859	-1.9296	0.0536568	0.492278	ENSG00000231500
TMEM132C	36.6186	-0.902983	0.467857	-1.93004	0.0536015	0.492278	ENSG00000181234
AF274853.1	47.2719	0.944335	0.489797	1.92801	0.0538534	0.492451	ENSG00000287918
LINC00662	2546.62	-0.268929	0.139476	-1.92814	0.0538378	0.492451	ENSG00000261824
TIMM10B	894.04	-0.256492	0.133016	-1.92827	0.0538213	0.492451	ENSG00000132286
AC004997.1	19.4007	6.08077	3.16015	1.9242	0.0543291	0.492633	ENSG00000248751
AC010323.1	28.0585	-1.66893	0.866101	-1.92695	0.0539857	0.492633	ENSG00000167774
AC100793.3	18.5916	2.14994	1.11721	1.92438	0.0543073	0.492633	ENSG00000267765
AL356599.1	272.398	0.413524	0.214581	1.92712	0.0539647	0.492633	ENSG00000235652
ANXA6	1095.06	-0.440867	0.229122	-1.92415	0.0543353	0.492633	ENSG00000197043
BBC3	392.769	-0.435756	0.226305	-1.92553	0.0541637	0.492633	ENSG00000105327
CFAP43	47.0167	0.813384	0.422658	1.92445	0.0542981	0.492633	ENSG00000197748
ELP2	2051.82	-0.313991	0.163132	-1.92477	0.0542584	0.492633	ENSG00000134759
MC1R	403.446	0.377074	0.195936	1.92447	0.0542951	0.492633	ENSG00000258839
PPP1R18	2578.08	-0.218342	0.113373	-1.92587	0.0541203	0.492633	ENSG00000146112
RBL2	847.759	0.303396	0.157619	1.92487	0.0542452	0.492633	ENSG00000103479
RSU1	1424.18	-0.235097	0.122031	-1.92654	0.0540374	0.492633	ENSG00000148484
SYT1	19466.7	-0.232411	0.120733	-1.925	0.0542296	0.492633	ENSG00000067715
TRH	173.023	-0.629949	0.327258	-1.92493	0.0542381	0.492633	ENSG00000170893
[truncated: 25,346 more rows]
